# Supplementary material for: Identification of the trail-following pheromone receptor in termites
Source: eLife. 2025 Aug 19;13:RP101814. doi: 10.7554/eLife.101814 (PMC12364489; doi:10.7554/eLife.101814)
Supplement: Figure 2—source data 1. [file elife-101814-fig2-data1.xlsx]

## Sheet: Sheet1
Replicate	Compound	Pre-stimulation spikes	Post-stimulation spikes	Generated spikes	Δ Spikes/s
1	hexane	8	5	-3
1	(3Z,6Z)-dodecadien-1-ol	6	9	3	6
1	(3Z)-dodecen-1-ol	11	10	-1	2
1	(3Z,6Z,8E)-dodecatrien-1-ol	5	12	7	10
1	n-eicosane	4	9	5	8
1	1-octadecanol	10	5	-5	-2
1	n-docosane	10	11	1	4
1	dodec-3-yn-1-ol	1	8	7	10
1	neocembrene	9	11	2	5
1	δ-cadinene	3	0	-3	0
1	(3R,6E)-nerolidol	0	0	0	3
2	hexane	6	3	-3
2	(3Z,6Z)-dodecadien-1-ol	9	7	-2	1
2	(3Z)-dodecen-1-ol	10	8	-2	1
2	(3Z,6Z,8E)-dodecatrien-1-ol	4	13	9	12
2	n-eicosane	12	2	-10	-7
2	1-octadecanol	8	6	-2	1
2	n-docosane	11	12	1	4
2	dodec-3-yn-1-ol	9	10	1	4
2	neocembrene	8	13	5	8
2	δ-cadinene	12	15	3	6
2	(3R,6E)-nerolidol	8	14	6	9
2	geranylgeraniol	12	10	-2	1
3	hexane	6	5	-1
3	(3Z,6Z)-dodecadien-1-ol	10	17	7	8
3	(3Z)-dodecen-1-ol	9	14	5	6
3	(3Z,6Z,8E)-dodecatrien-1-ol	6	19	13	14
3	n-eicosane	4	15	11	12
3	1-octadecanol	13	11	-2	-1
3	n-docosane	7	12	5	6
3	dodec-3-yn-1-ol	8	11	3	4
3	neocembrene	11	18	7	8
3	δ-cadinene	10	18	8	9
3	(3R,6E)-nerolidol	14	11	-3	-2
3	geranylgeraniol	7	12	5	6
4	hexane	11	10	-1
4	(3Z,6Z)-dodecadien-1-ol	12	17	5	6
4	(3Z)-dodecen-1-ol	4	15	11	12
4	(3Z,6Z,8E)-dodecatrien-1-ol	3	8	5	6
4	n-eicosane	3	3	0	1
4	1-octadecanol	2	2	0	1
4	n-docosane	5	10	5	6
4	dodec-3-yn-1-ol	4	12	8	9
4	neocembrene	2	9	7	8
4	δ-cadinene	6	5	-1	0
4	(3R,6E)-nerolidol	1	4	3	4
4	geranylgeraniol	3	5	2	3
5	hexane	10	8	-2
5	(3Z,6Z)-dodecadien-1-ol	7	8	1	3
5	(3Z)-dodecen-1-ol	9	9	0	2
5	(3Z,6Z,8E)-dodecatrien-1-ol	5	15	10	12
5	n-eicosane	6	12	6	8
5	1-octadecanol	9	16	7	9
5	n-docosane	8	10	2	4
5	dodec-3-yn-1-ol	6	9	3	5
5	neocembrene	1	5	4	6
5	δ-cadinene	5	0	-5	-3
5	(3R,6E)-nerolidol	4	2	-2	0
5	geranylgeraniol	3	1	-2	0
