# Supplementary material for: Identification of the trail-following pheromone receptor in termites
Source: eLife. 2025 Aug 19;13:RP101814. doi: 10.7554/eLife.101814 (PMC12364489; doi:10.7554/eLife.101814)
Supplement: Figure 2—source data 2. [file elife-101814-fig2-data2.xlsx]

## Sheet: Sheet1
Replicate	Compound	Pre-stimulation spikes	Post-stimulation spikes	Generated spikes	Δ Spikes/s
1	hexane	7	3	-4
1	1-octadecanol	10	6	-4	0
1	(3Z,6Z)-dodecadien-1-ol	6	7	1	5
1	(3Z)-dodecen-1-ol	16	8	-8	-4
1	dodec-3-yn-1-ol	8	18	10	14
1	(3Z,6Z,8E)-dodecatrien-1-ol	13	12	-1	3
1	(3R,6E)-nerolidol	15	8	-7	-3
1	geranylgeraniol	4	22	18	22
1	n-docosane	13	10	-3	1
1	n-eicosane	10	8	-2	2
1	neocembrene	14	62	48	52
1	δ-cadinene	13	22	9	13
2	hexane	8	9	1
2	1-octadecanol	5	3	-2	-3
2	(3Z,6Z)-dodecadien-1-ol	7	3	-4	-5
2	(3Z)-dodecen-1-ol	13	3	-10	-11
2	dodec-3-yn-1-ol	9	3	-6	-7
2	(3Z,6Z,8E)-dodecatrien-1-ol	13	3	-10	-11
2	(3R,6E)-nerolidol	6	5	-1	-2
2	geranylgeraniol	4	38	34	33
2	n-docosane	8	2	-6	-7
2	n-eicosane	7	2	-5	-6
2	neocembrene	4	55	51	50
2	δ-cadinene	4	5	1	0
3	hexane	17	15	-2
3	1-octadecanol	11	6	-5	-3
3	(3Z,6Z)-dodecadien-1-ol	10	13	3	5
3	(3Z)-dodecen-1-ol	17	7	-10	-8
3	dodec-3-yn-1-ol	10	7	-3	-1
3	(3Z,6Z,8E)-dodecatrien-1-ol	18	5	-13	-11
3	(3R,6E)-nerolidol	17	14	-3	-1
3	geranylgeraniol	15	41	26	28
3	n-docosane	20	12	-8	-6
3	n-eicosane	13	4	-9	-7
3	neocembrene	18	90	72	74
3	δ-cadinene	12	6	-6	-4
4	hexane	6	7	1
4	1-octadecanol	15	3	-12	-13
4	(3Z,6Z)-dodecadien-1-ol	7	7	0	-1
4	(3Z)-dodecen-1-ol	14	5	-9	-10
4	dodec-3-yn-1-ol	16	9	-7	-8
4	(3Z,6Z,8E)-dodecatrien-1-ol	12	6	-6	-7
4	(3R,6E)-nerolidol	12	6	-6	-7
4	geranylgeraniol	2	28	26	25
4	n-docosane	16	4	-12	-13
4	n-eicosane	7	1	-6	-7
4	neocembrene	12	57	45	44
4	δ-cadinene	5	7	2	1
5	hexane	8	6	-2
5	1-octadecanol	8	3	-5	-3
5	(3Z,6Z)-dodecadien-1-ol	6	3	-3	-1
5	(3Z)-dodecen-1-ol	2	5	3	5
5	dodec-3-yn-1-ol	2	6	4	6
5	(3Z,6Z,8E)-dodecatrien-1-ol	8	4	-4	-2
5	(3R,6E)-nerolidol	10	8	-2	0
5	geranylgeraniol	6	20	14	16
5	n-docosane	6	7	1	3
5	n-eicosane	6	4	-2	0
5	neocembrene	5	49	44	46
5	δ-cadinene	10	7	-3	-1
