# Supplementary material for: Identification of the trail-following pheromone receptor in termites
Source: eLife. 2025 Aug 19;13:RP101814. doi: 10.7554/eLife.101814 (PMC12364489; doi:10.7554/eLife.101814)
Supplement: Figure 2—source data 3. [file elife-101814-fig2-data3.xlsx]

## Sheet: Sheet1
Replicate	Compound	Pre-stimulation spikes	Post-stimulation spikes	Generated spikes	Δ Spikes/s
1	hexane	1	0	-1
1	(3Z,6Z)-dodecadien-1-ol	1	5	4	5
1	(3Z)-dodecen-1-ol	7	3	-4	-3
1	(3Z,6Z,8E)-dodecatrien-1-ol	4	6	2	3
1	n-eicosane	4	8	4	5
1	1-octadecanol	5	6	1	2
1	n-docosane	5	6	1	2
1	dodec-3-yn-1-ol	4	2	-2	-1
1	neocembrene	5	3	-2	-1
1	δ-cadinene	5	3	-2	-1
1	(3R,6E)-nerolidol	2	3	1	2
1	geranylgeraniol	4	2	-2	-1
2	hexane	4	4	0
2	(3Z,6Z)-dodecadien-1-ol	5	6	1	1
2	(3Z)-dodecen-1-ol	5	8	3	3
2	(3Z,6Z,8E)-dodecatrien-1-ol	7	7	0	0
2	n-eicosane	7	7	0	0
2	1-octadecanol	9	6	-3	-3
2	n-docosane	5	11	6	6
2	dodec-3-yn-1-ol	9	7	-2	-2
2	neocembrene	9	11	2	2
2	δ-cadinene	5	7	2	2
2	(3R,6E)-nerolidol	11	8	-3	-3
2	geranylgeraniol	10	7	-3	-3
3	hexane	8	5	-3
3	(3Z,6Z)-dodecadien-1-ol	7	5	-2	1
3	(3Z)-dodecen-1-ol	6	5	-1	2
3	(3Z,6Z,8E)-dodecatrien-1-ol	9	5	-4	-1
3	n-eicosane	2	10	8	11
3	1-octadecanol	7	7	0	3
3	n-docosane	8	8	0	3
3	dodec-3-yn-1-ol	3	7	4	7
3	neocembrene	7	11	4	7
3	δ-cadinene	8	7	-1	2
3	(3R,6E)-nerolidol	7	3	-4	-1
3	geranylgeraniol	5	10	5	8
