# Supplementary material for: Identification of the trail-following pheromone receptor in termites
Source: eLife. 2025 Aug 19;13:RP101814. doi: 10.7554/eLife.101814 (PMC12364489; doi:10.7554/eLife.101814)
Supplement: Figure 2—source data 4. [file elife-101814-fig2-data4.xlsx]

## Sheet: Sheet1
Replicate	Compound	Pre-stimulation spikes	Post-stimulation spikes	Generated spikes	Δ Spikes/s
1	hexane	5	6	1
1	(3Z,6Z)-dodecadien-1-ol	5	24	19	18
1	(3Z)-dodecen-1-ol	5	25	20	19
1	(3Z,6Z,8E)-dodecatrien-1-ol	3	27	24	23
1	n-eicosane	3	25	22	21
1	1-octadecanol	5	25	20	19
1	n-docosane	6	27	21	20
1	dodec-3-yn-1-ol	4	28	24	23
1	neocembrene	6	19	13	12
1	δ-cadinene	3	19	16	15
1	(3R,6E)-nerolidol	5	16	11	10
1	geranylgeraniol	3	10	7	6
2	hexane	3	2	-1
2	(3Z,6Z)-dodecadien-1-ol	5	5	0	1
2	(3Z)-dodecen-1-ol	4	9	5	6
2	(3Z,6Z,8E)-dodecatrien-1-ol	2	7	5	6
2	n-eicosane	5	10	5	6
2	1-octadecanol	6	6	0	1
2	n-docosane	5	4	-1	0
2	dodec-3-yn-1-ol	7	6	-1	0
2	neocembrene	2	5	3	4
2	δ-cadinene	2	10	8	9
2	(3R,6E)-nerolidol	2	2	0	1
3	hexane	4	3	-1
3	(3Z,6Z)-dodecadien-1-ol	9	7	-2	-1
3	(3Z)-dodecen-1-ol	3	14	11	12
3	(3Z,6Z,8E)-dodecatrien-1-ol	8	14	6	7
3	n-eicosane	9	21	12	13
3	1-octadecanol	6	21	15	16
3	n-docosane	6	27	21	22
3	dodec-3-yn-1-ol	10	18	8	9
3	neocembrene	9	17	8	9
3	δ-cadinene	7	20	13	14
3	(3R,6E)-nerolidol	6	14	8	9
3	geranylgeraniol	10	21	11	12
4	hexane	13	15	2
4	(3Z,6Z)-dodecadien-1-ol	20	17	-3	-5
4	(3Z)-dodecen-1-ol	15	19	4	2
4	(3Z,6Z,8E)-dodecatrien-1-ol	14	21	7	5
4	n-eicosane	18	22	4	2
4	1-octadecanol	19	22	3	1
4	n-docosane	16	20	4	2
4	dodec-3-yn-1-ol	11	23	12	10
4	neocembrene	8	22	14	12
4	δ-cadinene	10	24	14	12
4	(3R,6E)-nerolidol	16	21	5	3
4	geranylgeraniol	12	21	9	7
5	hexane	11	10	-1
5	(3Z,6Z)-dodecadien-1-ol	17	18	1	2
5	(3Z)-dodecen-1-ol	5	16	11	12
5	(3Z,6Z,8E)-dodecatrien-1-ol	8	12	4	5
5	n-eicosane	17	14	-3	-2
5	1-octadecanol	7	13	6	7
5	n-docosane	11	16	5	6
5	dodec-3-yn-1-ol	10	15	5	6
5	neocembrene	0	15	15	16
6	hexane	24	25	1
6	(3Z,6Z)-dodecadien-1-ol	21	46	25	24
6	(3Z)-dodecen-1-ol	18	44	26	25
6	(3Z,6Z,8E)-dodecatrien-1-ol	14	44	30	29
6	n-eicosane	17	43	26	25
6	1-octadecanol	10	44	34	33
6	n-docosane	12	38	26	25
6	dodec-3-yn-1-ol	17	47	30	29
6	neocembrene	11	32	21	20
6	δ-cadinene	19	27	8	7
6	(3R,6E)-nerolidol	7	26	19	18
6	geranylgeraniol	9	19	10	9
