# Supplementary material for: Identification of the trail-following pheromone receptor in termites
Source: eLife. 2025 Aug 19;13:RP101814. doi: 10.7554/eLife.101814 (PMC12364489; doi:10.7554/eLife.101814)
Supplement: Figure 2—source data 5. [file elife-101814-fig2-data5.xlsx]

## Sheet: Sheet1
Fly line	Replicate	Compound	Pre-stimulation spikes	Post-stimulation spikes	Generated spikes	Δ Spikes/s		Fly line	Replicate	Compound	Pre-stimulation spikes	Post-stimulation spikes	Generated spikes	Δ Spikes/s
PsimOR14	1	hexane	7	3	-4			W1118	1	hexane	3	6	3
PsimOR14	1	(3Z,6Z)-dodecadien-1-ol	6	7	1	5		W1118	1	(3Z,6Z)-dodecadien-1-ol	1	3	2	-1
PsimOR14	1	(3Z)-dodecen-1-ol	16	8	-8	-4		W1118	1	(3Z)-dodecen-1-ol	2	4	2	-1
PsimOR14	1	(3Z,6Z,8E)-dodecatrien-1-ol	13	12	-1	3		W1118	1	(3Z,6Z,8E)-dodecatrien-1-ol	4	1	-3	-6
PsimOR14	1	n-eicosane	10	8	-2	2		W1118	1	n-eicosane	1	19	18	15
PsimOR14	1	1-octadecanol	10	6	-4	0		W1118	1	1-octadecanol	4	2	-2	-5
PsimOR14	1	n-docosane	13	10	-3	1		W1118	1	n-docosane	2	6	4	1
PsimOR14	1	dodec-3-yn-1-ol	8	18	10	14		W1118	1	dodec-3-yn-1-ol	2	5	3	0
PsimOR14	1	neocembrene	14	62	48	52		W1118	1	neocembrene	2	2	0	-3
PsimOR14	1	δ-cadinene	13	22	9	13		W1118	1	δ-cadinene	1	4	3	0
PsimOR14	1	(3R,6E)-nerolidol	15	8	-7	-3		W1118	1	(3R,6E)-nerolidol	3	1	-2	-5
PsimOR14	1	geranylgeraniol	4	22	18	22		W1118	1	geranylgeraniol	3	4	1	-2
PsimOR14	2	hexane	8	9	1			W1118	2	hexane	1	4	3
PsimOR14	2	(3Z,6Z)-dodecadien-1-ol	7	3	-4	-5		W1118	2	(3Z,6Z)-dodecadien-1-ol	2	4	2	-1
PsimOR14	2	(3Z)-dodecen-1-ol	13	3	-10	-11		W1118	2	(3Z)-dodecen-1-ol	5	4	-1	-4
PsimOR14	2	(3Z,6Z,8E)-dodecatrien-1-ol	13	3	-10	-11		W1118	2	(3Z,6Z,8E)-dodecatrien-1-ol	5	3	-2	-5
PsimOR14	2	n-eicosane	7	2	-5	-6		W1118	2	n-eicosane	3	3	0	-3
PsimOR14	2	1-octadecanol	5	3	-2	-3		W1118	2	1-octadecanol	3	2	-1	-4
PsimOR14	2	n-docosane	8	2	-6	-7		W1118	2	n-docosane	0	5	5	2
PsimOR14	2	dodec-3-yn-1-ol	9	3	-6	-7		W1118	2	dodec-3-yn-1-ol	3	3	0	-3
PsimOR14	2	neocembrene	4	55	51	50		W1118	2	neocembrene	4	4	0	-3
PsimOR14	2	δ-cadinene	4	5	1	0		W1118	2	δ-cadinene	6	0	-6	-9
PsimOR14	2	(3R,6E)-nerolidol	6	5	-1	-2		W1118	2	(3R,6E)-nerolidol	1	3	2	-1
PsimOR14	2	geranylgeraniol	4	38	34	33		W1118	2	geranylgeraniol	3	4	1	-2
PsimOR14	3	hexane	17	15	-2			W1118	3	hexane	5	1	-4
PsimOR14	3	(3Z,6Z)-dodecadien-1-ol	10	13	3	5		W1118	3	(3Z,6Z)-dodecadien-1-ol	5	5	0	4
PsimOR14	3	(3Z)-dodecen-1-ol	17	7	-10	-8		W1118	3	(3Z)-dodecen-1-ol	5	2	-3	1
PsimOR14	3	(3Z,6Z,8E)-dodecatrien-1-ol	18	5	-13	-11		W1118	3	(3Z,6Z,8E)-dodecatrien-1-ol	2	4	2	6
PsimOR14	3	n-eicosane	13	4	-9	-7		W1118	3	n-eicosane	3	5	2	6
PsimOR14	3	1-octadecanol	11	6	-5	-3		W1118	3	1-octadecanol	3	5	2	6
PsimOR14	3	n-docosane	20	12	-8	-6		W1118	3	n-docosane	4	5	1	5
PsimOR14	3	dodec-3-yn-1-ol	10	7	-3	-1		W1118	3	dodec-3-yn-1-ol	6	5	-1	3
PsimOR14	3	neocembrene	18	90	72	74		W1118	3	neocembrene	1	5	4	8
PsimOR14	3	δ-cadinene	12	6	-6	-4		W1118	3	δ-cadinene	4	4	0	4
PsimOR14	3	(3R,6E)-nerolidol	17	14	-3	-1		W1118	3	(3R,6E)-nerolidol	6	3	-3	1
PsimOR14	3	geranylgeraniol	15	41	26	28		W1118	3	geranylgeraniol	4	2	-2	2
PsimOR14	4	hexane	6	7	1			W1118	4	hexane	4	4	0
PsimOR14	4	neocembrene	12	57	45	44		W1118	4	(3Z,6Z)-dodecadien-1-ol	1	6	5	5
PsimOR14	4	geranylgeraniol	2	28	26	25		W1118	4	(3Z)-dodecen-1-ol	3	3	0	0
PsimOR14	4	(3Z,6Z)-dodecadien-1-ol	7	7	0	-1		W1118	4	(3Z,6Z,8E)-dodecatrien-1-ol	6	4	-2	-2
PsimOR14	4	(3Z)-dodecen-1-ol	14	5	-9	-10		W1118	4	n-eicosane	4	7	3	3
PsimOR14	4	(3Z,6Z,8E)-dodecatrien-1-ol	12	6	-6	-7		W1118	4	1-octadecanol	5	7	2	2
PsimOR14	4	n-eicosane	7	1	-6	-7		W1118	4	n-docosane	4	9	5	5
PsimOR14	4	1-octadecanol	15	3	-12	-13		W1118	4	dodec-3-yn-1-ol	0	4	4	4
PsimOR14	4	n-docosane	16	4	-12	-13		W1118	4	neocembrene	2	0	-2	-2
PsimOR14	4	dodec-3-yn-1-ol	16	9	-7	-8		W1118	4	δ-cadinene	5	2	-3	-3
PsimOR14	4	δ-cadinene	5	7	2	1		W1118	4	(3R,6E)-nerolidol	4	1	-3	-3
PsimOR14	4	(3R,6E)-nerolidol	12	6	-6	-7		W1118	4	geranylgeraniol	2	0	-2	-2
PsimOR14	5	hexane	8	6	-2			W1118	5	hexane	3	8	5
PsimOR14	5	neocembrene	5	49	44	46		W1118	5	(3Z,6Z)-dodecadien-1-ol	6	11	5	0
PsimOR14	5	geranylgeraniol	6	20	14	16		W1118	5	(3Z)-dodecen-1-ol	9	7	-2	-7
PsimOR14	5	(3Z,6Z)-dodecadien-1-ol	6	3	-3	-1		W1118	5	(3Z,6Z,8E)-dodecatrien-1-ol	6	9	3	-2
PsimOR14	5	(3Z)-dodecen-1-ol	2	5	3	5		W1118	5	n-eicosane	7	14	7	2
PsimOR14	5	(3Z,6Z,8E)-dodecatrien-1-ol	8	4	-4	-2		W1118	5	1-octadecanol	4	13	9	4
PsimOR14	5	n-eicosane	6	4	-2	0		W1118	5	n-docosane	8	7	-1	-6
PsimOR14	5	1-octadecanol	8	3	-5	-3		W1118	5	dodec-3-yn-1-ol	7	8	1	-4
PsimOR14	5	n-docosane	6	7	1	3		W1118	5	neocembrene	6	8	2	-3
PsimOR14	5	dodec-3-yn-1-ol	2	6	4	6		W1118	5	δ-cadinene	5	8	3	-2
PsimOR14	5	δ-cadinene	10	7	-3	-1		W1118	5	(3R,6E)-nerolidol	6	6	0	-5
PsimOR14	5	(3R,6E)-nerolidol	10	8	-2	0		W1118	5	geranylgeraniol	6	6	0	-5
