# Supplementary material for: Identification of the trail-following pheromone receptor in termites
Source: eLife. 2025 Aug 19;13:RP101814. doi: 10.7554/eLife.101814 (PMC12364489; doi:10.7554/eLife.101814)
Supplement: Figure 2—source data 6. [file elife-101814-fig2-data6.xlsx]

## Sheet: Sheet1
	Δ Spikes/s
	replicate	1	2	3	4	5	6	7	8	9
Dose	0.01 ng	22	10	10	6	-4	10	18	16	24
	0.1 ng	4	26	26	8	0	0	4	38	12
	1 ng	14	32	14	10	12	2	22	28	10
	10 ng	10	30	32	26	26	14	20	32	6
	100 ng	30		24	26	42	38	46	26	10
	500 ng	44		36	22	34
