# Supplementary material for: Identification of the trail-following pheromone receptor in termites
Source: eLife. 2025 Aug 19;13:RP101814. doi: 10.7554/eLife.101814 (PMC12364489; doi:10.7554/eLife.101814)
Supplement: Figure 3—source data 1. [file elife-101814-fig3-data1.xlsx]

## Sheet: Sheet1
Panel	Replicate	Compound	Pre-stimulation spikes	Post-stimulation spikes	Generated spikes	Δ Spikes/s
2	1	paraffin oil	6	2	-4
2	1	myrcene	10	15	5	9
2	1	eucalyptol	2	2	0	4
2	1	(+)-3-carene	2	5	3	7
2	1	ethanol	2	6	4	8
2	1	(2E)-hexenal	3	5	2	6
2	1	(+)-α-pinene	3	2	-1	3
2	1	p-cymene	3	2	-1	3
2	1	(+)-limonene	4	3	-1	3
2	1	(+)-longifolene	3	2	-1	3
2	1	(-)-β-caryophyllene	1	2	1	5
2	1	(2E)-hexen-1-ol	1	0	-1	3
2	1	isoamyl propionate	0	0	0	4
2	1	sabinene	2	1	-1	3
2	1	γ-terpinene	0	2	2	6
2	1	terpinolene	2	0	-2	2
2	1	toluene	1	5	4	8
2	1	pentyl acetate	1	3	2	6
2	1	ethyl acetate	2	1	-1	3
2	1	heptanal	0	0	0	4
2	1	γ-nonalactone	2	0	-2	2
2	2	paraffin oil	0	1	1
2	2	myrcene	6	11	5	4
2	2	eucalyptol	0	13	13	12
2	2	(+)-3-carene	6	10	4	3
2	2	ethanol	2	12	10	9
2	2	(2E)-hexenal	6	11	5	4
2	2	(+)-α-pinene	0	10	10	9
2	2	p-cymene	8	12	4	3
2	2	(+)-limonene	2	11	9	8
2	2	(+)-longifolene	1	10	9	8
2	2	(-)-β-caryophyllene	5	7	2	1
2	2	(2E)-hexen-1-ol	8	12	4	3
2	2	isoamyl propionate	8	8	0	-1
2	2	sabinene	6	16	10	9
2	2	γ-terpinene	9	7	-2	-3
2	2	terpinolene	5	10	5	4
2	2	toluene	8	8	0	-1
2	2	pentyl acetate	7	9	2	1
2	2	ethyl acetate	8	9	1	0
2	2	heptanal	10	9	-1	-2
2	2	γ-nonalactone	6	12	6	5
2	3	paraffin oil	5	6	1
2	3	myrcene	2	6	4	3
2	3	eucalyptol	2	10	8	7
2	3	(+)-3-carene	0	14	14	13
2	3	ethanol	2	6	4	3
2	3	(2E)-hexenal	2	12	10	9
2	3	(+)-α-pinene	2	9	7	6
2	3	p-cymene	3	4	1	0
2	3	(+)-limonene	1	1	0	-1
2	3	(+)-longifolene	0	10	10	9
2	3	(-)-β-caryophyllene	0	10	10	9
2	3	(2E)-hexen-1-ol	4	1	-3	-4
2	3	(2E)-hexen-1-ol	3	1	-2	-3
2	3	sabinene	1	2	1	0
2	3	γ-terpinene	9	5	-4	-5
2	3	terpinolene	1	9	8	7
2	3	toluene	2	0	-2	-3
2	3	pentyl acetate	1	9	8	7
2	3	ethyl acetate	4	0	-4	-5
2	3	heptanal	1	4	3	2
2	3	γ-nonalactone	2	2	0	-1
2	4	paraffin oil	4	5	1	0
2	4	myrcene	3	1	-2	-3
2	4	eucalyptol	0	7	7	6
2	4	(+)-3-carene	2	5	3	2
2	4	ethanol	1	4	3	2
2	4	(2E)-hexenal	0	3	3	2
2	4	(+)-α-pinene	3	12	9	8
2	4	p-cymene	1	11	10	9
2	4	(+)-limonene	0	3	3	2
2	4	(+)-longifolene	0	8	8	7
2	4	(-)-β-caryophyllene	0	2	2	1
2	4	(2E)-hexen-1-ol	0	5	5	4
2	4	isoamyl propionate	0	5	5	4
2	4	sabinene	2	2	0	-1
2	4	γ-terpinene	3	9	6	5
2	4	terpinolene	7	4	-3	-4
2	4	toluene	2	2	0	-1
2	4	pentyl acetate	3	2	-1	-2
2	4	ethyl acetate	1	1	0	-1
2	4	heptanal	3	1	-2	-3
2	4	paraffin oil	6	7	1	0
2	5	myrcene	11	11	0	-1
2	5	eucalyptol	7	13	6	5
2	5	(+)-3-carene	12	11	-1	-2
2	5	ethanol	11	9	-2	-3
2	5	(2E)-hexenal	11	13	2	1
2	5	(+)-α-pinene	12	11	-1	-2
2	5	p-cymene	11	16	5	4
2	5	(+)-limonene	9	9	0	-1
2	5	(+)-longifolene	17	9	-8	-9
2	5	(-)-β-caryophyllene	6	13	7	6
2	5	(2E)-hexen-1-ol	9	3	-6	-7
2	5	isoamyl propionate	0	0	0	-1
2	5	sabinene	6	19	13	12
2	5	γ-terpinene	3	13	10	9
2	5	terpinolene	9	15	6	5
2	5	toluene	10	13	3	2
2	5	pentyl acetate	6	11	5	4
2	5	ethyl acetate	8	19	11	10
2	5	heptanal	14	7	-7	-8
2	5	γ-nonalactone	10	14	4	3
