# Supplementary material for: Identification of the trail-following pheromone receptor in termites
Source: eLife. 2025 Aug 19;13:RP101814. doi: 10.7554/eLife.101814 (PMC12364489; doi:10.7554/eLife.101814)
Supplement: Figure 3—source data 2. [file elife-101814-fig3-data2.xlsx]

## Sheet: Sheet1
Panel	Replicate	Compound	Pre-stimulation spikes	Post-stimulation spikes	Generated spikes	Δ Spikes/s
3	1	paraffin oil	4	5	1
3	1	ethyl (2E,4Z)-decadienoate	4	6	2	1
3	1	p-cresol	2	9	7	6
3	1	β-bisabolene	7	2	-5	-6
3	1	(E)-myrcenol	1	6	5	4
3	1	nonan-1-ol	1	8	7	6
3	1	isoamyl acetate	5	11	6	5
3	1	2-phenylethyl acetate	3	9	6	5
3	1	octan-1-ol	6	12	6	5
3	1	benzyl alcohol	12	11	-1	-2
3	1	methyl jasmonate	8	13	5	4
3	1	(E)-β-ocimene	6	14	8	7
3	1	eucarvone	10	4	-6	-7
3	1	α-camphorene	2	14	12	11
3	1	(-)-trans-pinocarveol	6	4	-2	-3
3	1	cryptone	8	8	0	-1
3	1	(+)-cis-carveol	12	17	5	4
3	2	paraffin oil	9	5	-4
3	2	ethyl (2E,4Z)-decadienoate	19	11	-8	-4
3	2	p-cresol	15	15	0	4
3	2	β-bisabolene	8	14	6	10
3	2	(E)-myrcenol	17	16	-1	3
3	2	nonan-1-ol	17	14	-3	1
3	2	isoamyl acetate	20	16	-4	0
3	2	2-phenylethyl acetate	13	7	-6	-2
3	2	octan-1-ol	10	3	-7	-3
3	2	benzyl alcohol	3	2	-1	3
3	2	methyl jasmonate	0	1	1	5
3	2	(E)-β-ocimene	0	2	2	6
3	2	eucarvone	0	1	1	5
3	2	α-camphorene	0	1	1	5
3	2	(-)-trans-pinocarveol	0	1	1	5
3	2	cryptone	0	0	0	4
3	2	(+)-cis-carveol	0	0	0	4
3	3	paraffin oil	0	1	1
3	3	ethyl (2E,4Z)-decadienoate	4	8	4	3
3	3	p-cresol	2	6	4	3
3	3	β-bisabolene	12	3	-9	-10
3	3	(E)-myrcenol	6	10	4	3
3	3	nonan-1-ol	5	7	2	1
3	3	isoamyl acetate	4	9	5	4
3	3	2-phenylethyl acetate	6	9	3	2
3	3	octan-1-ol	0	14	14	13
3	3	benzyl alcohol	8	7	-1	-2
3	3	methyl jasmonate	9	11	2	1
3	3	(E)-β-ocimene	2	4	2	1
3	3	eucarvone	10	1	-9	-10
3	3	α-camphorene	7	7	0	-1
3	3	(-)-trans-pinocarveol	5	0	-5	-6
3	3	cryptone	5	8	3	2
3	3	(+)-cis-carveol	5	6	1	0
3	4	paraffin oil	2	7	5
3	4	ethyl (2E,4Z)-decadienoate	1	0	-1	-6
3	4	p-cresol	6	10	4	-1
3	4	β-bisabolene	3	9	6	1
3	4	(E)-myrcenol	2	9	7	2
3	4	nonan-1-ol	10	4	-6	-11
3	4	isoamyl acetate	1	6	5	0
3	4	2-phenylethyl acetate	0	0	0	-5
3	4	octan-1-ol	2	0	-2	-7
3	4	benzyl alcohol	1	5	4	-1
3	4	methyl jasmonate	10	3	-7	-12
3	4	(E)-β-ocimene	0	5	5	0
3	4	eucarvone	3	1	-2	-7
3	4	α-camphorene	1	0	-1	-6
3	4	(-)-trans-pinocarveol	9	5	-4	-9
3	4	cryptone	9	6	-3	-8
3	4	(+)-cis-carveol	1	0	-1	-6
3	5	paraffin oil	4	1	-3
3	5	ethyl (2E,4Z)-decadienoate	1	4	3	6
3	5	p-cresol	0	0	0	3
3	5	β-bisabolene	0	15	15	18
3	5	(E)-myrcenol	5	5	0	3
3	5	nonan-1-ol	0	1	1	4
3	5	isoamyl acetate	4	1	-3	0
3	5	2-phenylethyl acetate	3	3	0	3
3	5	octan-1-ol	9	6	-3	0
3	5	benzyl alcohol	5	0	-5	-2
3	5	methyl jasmonate	0	1	1	4
3	5	(E)-β-ocimene	2	0	-2	1
3	5	eucarvone	9	7	-2	1
3	5	α-camphorene	11	4	-7	-4
3	5	(-)-trans-pinocarveol	0	0	0	3
3	5	cryptone	3	2	-1	2
3	5	(+)-cis-carveol	4	1	-3	0
