# Supplementary material for: Identification of the trail-following pheromone receptor in termites
Source: eLife. 2025 Aug 19;13:RP101814. doi: 10.7554/eLife.101814 (PMC12364489; doi:10.7554/eLife.101814)
Supplement: Figure 3—source data 3. [file elife-101814-fig3-data3.xlsx]

## Sheet: Sheet1
Panel	Replicate	Compound	Pre-stimulation spikes	Post-stimulation spikes	Generated spikes	Δ Spikes/s
4	1	paraffin oil	6	1	-5
4	1	(-)-verbenone	14	4	-10	-5
4	1	oct-1-en-3-ol	4	2	-2	3
4	1	acetophenone	12	20	8	13
4	1	4-vinylanisole	12	14	2	7
4	1	4-ethylguaiacol	6	2	-4	1
4	1	(±)-camphor	10	6	-4	1
4	1	octan-1-ol	16	6	-10	-5
4	1	methyleugenol	18	2	-16	-11
4	1	styrene	16	14	-2	3
4	1	benzaldehyde	20	6	-14	-9
4	1	linalool	21	0	-21	-16
4	1	4-methylanisole	20	6	-14	-9
4	1	2-methylbutan-1-ol	4	0	-4	1
4	1	isoamyl alcohol	12	0	-12	-7
4	1	2-methylbutyl acetate	18	14	-4	1
4	1	(±)-myrtenol	7	2	-5	0
4	2	paraffin oil	7	4	-3
4	2	(-)-verbenone	2	12	10	13
4	2	oct-1-en-3-ol	7	8	1	4
4	2	acetophenone	4	10	6	9
4	2	4-vinylanisole	8	5	-3	0
4	2	4-ethylguaiacol	6	10	4	7
4	2	(±)-camphor	4	11	7	10
4	2	octan-1-ol	13	8	-5	-2
4	2	methyleugenol	5	14	9	12
4	2	styrene	10	6	-4	-1
4	2	benzaldehyde	7	11	4	7
4	2	linalool	5	5	0	3
4	2	4-methylanisole	10	4	-6	-3
4	2	2-methylbutan-1-ol	8	6	-2	1
4	2	isoamyl alcohol	11	12	1	4
4	2	2-methylbutyl acetate	10	10	0	3
4	2	(±)-myrtenol	7	9	2	5
4	2	2-phenylethanol	4	8	4	7
4	2	hexan-1-ol	9	4	-5	-2
4	2	2,3-dihydrobenzofuran	9	4	-5	-2
4	2	geranyl acetone	8	6	-2	1
4	3	paraffin oil	4	2	-2
4	3	(-)-verbenone	12	8	-4	-2
4	3	oct-1-en-3-ol	7	5	-2	0
4	3	acetophenone	2	10	8	10
4	3	4-vinylanisole	8	12	4	6
4	3	4-ethylguaiacol	1	11	10	12
4	3	(±)-camphor	1	10	9	11
4	3	octan-1-ol	9	6	-3	-1
4	3	methyleugenol	9	6	-3	-1
4	3	styrene	3	5	2	4
4	3	benzaldehyde	11	6	-5	-3
4	3	linalool	10	1	-9	-7
4	3	4-methylanisole	3	9	6	8
4	3	2-methylbutan-1-ol	7	2	-5	-3
4	3	isoamyl alcohol	10	9	-1	1
4	3	2-methylbutyl acetate	10	6	-4	-2
4	3	(±)-myrtenol	5	3	-2	0
4	3	2-phenylethanol	2	8	6	8
4	3	hexan-1-ol	7	4	-3	-1
4	3	2,3-dihydrobenzofuran	6	9	3	5
4	3	geranyl acetone	6	9	3	5
4	4	paraffin oil	10	6	-4
4	4	(-)-verbenone	11	5	-6	-2
4	4	oct-1-en-3-ol	7	8	1	5
4	4	acetophenone	13	3	-10	-6
4	4	4-vinylanisole	8	8	0	4
4	4	4-ethylguaiacol	7	6	-1	3
4	4	(±)-camphor	1	1	0	4
4	4	octan-1-ol	7	7	0	4
4	4	methyleugenol	14	7	-7	-3
4	4	styrene	11	6	-5	-1
4	4	benzaldehyde	5	14	9	13
4	4	linalool	8	0	-8	-4
4	4	4-methylanisole	7	5	-2	2
4	4	2-methylbutan-1-ol	5	0	-5	-1
4	4	isoamyl alcohol	9	3	-6	-2
4	4	2-methylbutyl acetate	6	9	3	7
4	4	(±)-myrtenol	3	6	3	7
4	4	2-phenylethanol	6	5	-1	3
4	4	hexan-1-ol	9	8	-1	3
4	4	2,3-dihydrobenzofuran	6	4	-2	2
4	4	geranyl acetone	10	7	-3	1
4	5	paraffin oil	8	7	-1
4	5	(-)-verbenone	6	3	-3	-2
4	5	oct-1-en-3-ol	3	1	-2	-1
4	5	acetophenone	6	2	-4	-3
4	5	4-vinylanisole	5	3	-2	-1
4	5	4-ethylguaiacol	9	5	-4	-3
4	5	(±)-camphor	8	5	-3	-2
4	5	octan-1-ol	6	4	-2	-1
4	5	methyleugenol	7	8	1	2
4	5	styrene	7	6	-1	0
4	5	benzaldehyde	10	5	-5	-4
4	5	linalool	9	2	-7	-6
4	5	4-methylanisole	10	9	-1	0
4	5	2-methylbutan-1-ol	10	4	-6	-5
4	5	isoamyl alcohol	10	7	-3	-2
4	5	2-methylbutyl acetate	10	8	-2	-1
4	5	(±)-myrtenol	6	5	-1	0
4	5	2-phenylethanol	8	7	-1	0
4	5	hexan-1-ol	9	5	-4	-3
4	5	2,3-dihydrobenzofuran	7	6	-1	0
4	5	geranyl acetone	9	6	-3	-2
4	6	paraffin oil	9	10	1
4	6	(-)-verbenone	7	4	-3	-4
4	6	oct-1-en-3-ol	6	8	2	1
4	6	acetophenone	12	6	-6	-7
4	6	4-vinylanisole	7	6	-1	-2
4	6	4-ethylguaiacol	8	5	-3	-4
4	6	(±)-camphor	11	14	3	2
4	6	octan-1-ol	13	5	-8	-9
4	6	methyleugenol	5	6	1	0
4	6	styrene	9	6	-3	-4
4	6	benzaldehyde	6	7	1	0
4	6	linalool	11	1	-10	-11
4	6	4-methylanisole	9	8	-1	-2
4	6	2-methylbutan-1-ol	10	4	-6	-7
4	6	isoamyl alcohol	7	7	0	-1
4	6	2-methylbutyl acetate	6	7	1	0
4	6	(±)-myrtenol	7	6	-1	-2
4	6	2-phenylethanol	10	8	-2	-3
4	6	hexan-1-ol	11	6	-5	-6
4	6	2,3-dihydrobenzofuran	12	9	-3	-4
4	6	geranyl acetone	12	9	-3	-4
