# Supplementary material for: Identification of the trail-following pheromone receptor in termites
Source: eLife. 2025 Aug 19;13:RP101814. doi: 10.7554/eLife.101814 (PMC12364489; doi:10.7554/eLife.101814)
Supplement: Figure 3—source data 4. [file elife-101814-fig3-data4.xlsx]

## Sheet: Sheet1
Panel	Compound	Provider	Purity
1	n-eicosane	Merck	0.99
1	n-docosane	Merck	0.99
1	1-octadecanol	Merck	0.99
1	(3Z)-dodecen-1-ol	IOCB	in house synthesis, see Appendix 1, GC purity 95%
1	(3Z,6Z)-dodecadien-1-ol	IOCB	in house synthesis, see Appendix 1, GC purity 94%
1	(3Z,6Z,8E)-dodecatrien-1-ol	IOCB	in house synthesis, see Appendix 1, GC purity 96%
1	dodec-3-yn-1-ol	IOCB	in house synthesis, see Appendix 1,GC purity 93%
1	δ-cadinene	Chemenu	0.95
1	(3R,6E)-nerolidol	IOCB	in house synthesis (Havlíčková et al. 2019), 96%
1	neocembrene	IOCB	purified from natural resource (Sillam-Dussès et al., 2005), GC purity 96%
1	geranylgeraniol	Merck	0.98
2	myrcene	Sigma Aldrich	≥90%
2	eucalyptol	Sigma Aldrich	0.99
2	(+)-3-carene	Sigma Aldrich	0.9
2	(+)-limonene	Thermo-Fisher	0.97
2	(+)-α-pinene	Sigma Aldrich	0.98
2	p-cymene	Sigma Aldrich	0.99
2	γ-terpinene	Sigma Aldrich	0.97
2	(-)-β-caryophyllene	Sigma Aldrich	0.98
2	(+)-longifolene	Phyto Lab	≥90%
2	terpinolene	Sigma Aldrich	≥85%
2	toluene	VWR Chemicals	0.99
2	(2E)-hexenal	Thermo-Fisher	0.98
2	sabinene	Chemenu	≥95%
2	pentyl acetate	Sigma Aldrich	≥99%
2	ethyl acetate	VWR Chemicals	0.99
2	γ-nonalactone	Sigma Aldrich	0.98
2	heptanal	Thermo-Fisher	0.98
2	isoamyl propionate	Sigma Aldrich	≥98%
2	ethanol	VWR Chemicals	≥99%
2	(2E)-hexen-1-ol	Sigma Aldrich	0.96
3	β-bisabolene	Thermo-Fisher	0.96
3	(E)-myrcenol	FytoFarm	0.95
3	(-)-trans-pinocarveol	Sigma Aldrich	≥96%
3	isoamyl acetate	Sigma Aldrich	≥99%
3	2-phenylethyl acetate	J&K Scientific Ltd.	≥98%
3	α-camphorene	Synergy Ltd	≥90%
3	(E)-β-ocimene	TRC Canada	0.98
3	nonan-1-ol	Thermo-Fisher	0.95
3	octan-1-ol	Honeywell	0.99
3	benzyl alcohol	Thermo-Fisher	0.99
3	p-cresol	Sigma Aldrich	≥99%
3	cryptone	Chemenu	≥95%
3	(+)-cis-carveol	BOC Sciences	0.95
3	methyl jasmonate	Sigma Aldrich	≥98%
3	eucarvone	MuseChem	≥95%
3	ethyl (2E,4Z)-decadienoate	Sigma Aldrich	0.95
4	(-)-verbenone	Merck	0.94
4	acetophenone	Sigma Aldrich	0.99
4	2-phenylethanol	Acros organics	0.99
4	(±)-myrtenol	Sigma Aldrich	0.95
4	geranyl acetone	Sigma Aldrich	≥97%
4	oct-1-en-3-ol	Thermo-Fisher	0.98
4	4-vinylanisole	Sigma Aldrich	0.97
4	4-ethylguaiacol	Sigma Aldrich	≥98%
4	hexan-1-ol	Sigma Aldrich	0.99
4	oct-1-en-3-ol	Sigma Aldrich	≥97%
4	styrene	Thermo-Fisher	0.99
4	2,3-dihydrobenzofuran	Thermo-Fisher	0.99
4	2-methylbutan-1-ol	J&K Scientific Ltd.	0.98
4	2-methylbutyl acetate	Sigma Aldrich	0.99
4	4-methylanisole	Sigma Aldrich	0.97
4	linalool	Thermo-Fisher	0.97
4	methyleugenol	Sigma Aldrich	0.98
4	(±)-camphor	Sigma Aldrich	≥95%
4	benzaldehyde	Sigma Aldrich	≥99%
4	isoamyl alcohol	VWR Life Science	≥98%
