# Supplementary material for: Identification of the trail-following pheromone receptor in termites
Source: eLife. 2025 Aug 19;13:RP101814. doi: 10.7554/eLife.101814 (PMC12364489; doi:10.7554/eLife.101814)
Supplement: Figure 5—source data 1. [file elife-101814-fig5-data1.xlsx]

## Sheet: Sheet1
Replicate	Compound	Pre-stimulation spikes	Post-stimulation spikes	Generated spikes	Δ Spikes/s		Replicate	Compound	Pre-stimulation spikes	Post-stimulation spikes	Generated spikes	Δ Spikes/s
1	hexane	8	8	0			10	hexane	17	22	5
1	(3Z,6Z)-dodecadien-1-ol	5	8	3	6		10	neocembrene	20	39	19	28
1	(3Z)-dodecen-1-ol	12	21	9	18		10	geranylgeraniol	17	41	24	38
1	(3Z,6Z,8E)-dodecatrien-1-ol	10	13	3	6		11	hexane	6	11	5
1	n-eicosane	6	8	2	4		11	neocembrene	19	46	27	44
1	1-octadecanol	5	8	3	6		11	geranylgeraniol	24	34	10	10
1	n-docosane	3	5	2	4		12	hexane	28	26	-2
1	(3R,6E)-nerolidol	4	16	12	24		12	neocembrene	31	56	25	54
1	neocembrene	11	34	23	46		13	hexane	41	37	-4
1	δ-cadinene	9	12	3	6		13	neocembrene	17	38	21	50
1	dodec-3-yn-1-ol	5	6	1	2		13	geranylgeraniol	8	28	20	48
1	geranylgeraniol	4	12	8	16		13	(3Z,6Z)-dodecadien-1-ol	15	13	-2	4
2	hexane	18	18	0			13	(3Z)-dodecen-1-ol	18	20	2	12
2	(3Z,6Z)-dodecadien-1-ol	9	11	2	4		13	(3Z,6Z,8E)-dodecatrien-1-ol	12	13	1	10
2	(3Z)-dodecen-1-ol	2	5	3	6		13	n-eicosane	15	18	3	14
2	(3Z,6Z,8E)-dodecatrien-1-ol	8	6	-2	-4		13	1-octadecanol	7	11	4	16
2	neocembrene	3	41	38	76		13	n-docosane	7	11	4	16
2	geranylgeraniol	2	11	9	18		13	(3R,6E)-nerolidol	27	19	-8	-8
3	hexane	6	6	0			13	δ-cadinene	27	23	-4	0
3	(3Z,6Z)-dodecadien-1-ol	10	12	2	4		13	dodec-3-yn-1-ol	18	30	12	32
3	(3Z)-dodecen-1-ol	15	9	-6	-12		14	hexane	25	21	-4
3	(3Z,6Z,8E)-dodecatrien-1-ol	9	11	2	4		14	neocembrene	18	68	50	108
3	neocembrene	10	46	36	72		14	geranylgeraniol	15	22	7	22
3	geranylgeraniol	6	16	10	20		14	(3Z,6Z)-dodecadien-1-ol	28	15	-13	-18
3	δ-cadinene	12	13	1	2		14	(3Z)-dodecen-1-ol	32	26	-6	-4
4	hexane	5	6	1			14	(3Z,6Z,8E)-dodecatrien-1-ol	20	24	4	16
4	(3Z,6Z)-dodecadien-1-ol	10	12	2	2		14	n-eicosane	21	17	-4	0
4	(3Z)-dodecen-1-ol	10	2	-8	-18		14	1-octadecanol	30	23	-7	-6
4	(3Z,6Z,8E)-dodecatrien-1-ol	9	9	0	-2		14	n-docosane	27	24	-3	2
4	neocembrene	7	45	38	74		14	(3R,6E)-nerolidol	7	9	2	12
4	geranylgeraniol	3	9	6	10		14	δ-cadinene	13	11	-2	4
5	hexane	6	10	4			14	dodec-3-yn-1-ol	8	8	0	8
5	(3Z,6Z)-dodecadien-1-ol	7	13	6	4		15	hexane	9	8	-1
5	(3Z)-dodecen-1-ol	6	15	9	10		15	(3Z,6Z)-dodecadien-1-ol	24	21	-3	-4
5	(3Z,6Z,8E)-dodecatrien-1-ol	9	11	2	-4		15	(3Z)-dodecen-1-ol	24	29	5	12
5	neocembrene	5	51	46	84		15	(3Z,6Z,8E)-dodecatrien-1-ol	13	14	1	4
6	hexane	12	4	-8			15	n-eicosane	8	19	11	24
6	(3Z,6Z)-dodecadien-1-ol	7	14	7	30		15	1-octadecanol	23	19	-4	-6
6	(3Z)-dodecen-1-ol	11	7	-4	8		15	n-docosane	30	26	-4	-6
6	(3Z,6Z,8E)-dodecatrien-1-ol	10	18	8	32		15	(3R,6E)-nerolidol	9	16	7	16
6	neocembrene	3	48	45	106		15	neocembrene	12	40	28	58
6	geranylgeraniol	9	14	5	26		15	δ-cadinene	9	9	0	2
7	hexane	36	33	-3			15	dodec-3-yn-1-ol	16	8	-8	-14
7	(3Z,6Z)-dodecadien-1-ol	40	53	13	32		15	geranylgeraniol	10	24	14	30
7	(3Z)-dodecen-1-ol	47	49	2	10		16	hexane	13	7	-6
7	(3Z,6Z,8E)-dodecatrien-1-ol	55	64	9	24		16	neocembrene	18	38	20	52
7	n-eicosane	54	54	0	6		16	geranylgeraniol	9	26	17	46
7	1-octadecanol	54	49	-5	-4		16	(3Z,6Z)-dodecadien-1-ol	15	12	-3	6
7	n-docosane	56	49	-7	-8		16	(3Z)-dodecen-1-ol	12	25	13	38
7	(3R,6E)-nerolidol	57	50	-7	-8		16	(3Z,6Z,8E)-dodecatrien-1-ol	11	13	2	16
7	δ-cadinene	52	46	-6	-6		16	n-eicosane	15	18	3	18
7	dodec-3-yn-1-ol	48	54	6	18		16	1-octadecanol	7	13	6	24
7	neocembrene	40	74	34	74		16	n-docosane	9	10	1	14
7	geranylgeraniol	17	40	23	52		16	(3R,6E)-nerolidol	7	13	6	24
8	hexane	34	32	-2			16	δ-cadinene	12	13	1	14
8	neocembrene	18	46	28	60		16	dodec-3-yn-1-ol	8	18	10	32
8	geranylgeraniol	20	39	19	42		17	hexane	16	14	-2
9	hexane	65	70	5			17	neocembrene	7	32	25	54
9	(3Z,6Z)-dodecadien-1-ol	28	33	5	0		17	geranylgeraniol	8	14	6	16
9	(3Z)-dodecen-1-ol	37	36	-1	-12		17	(3Z,6Z)-dodecadien-1-ol	10	7	-3	-2
9	(3Z,6Z,8E)-dodecatrien-1-ol	29	27	-2	-14		17	(3Z)-dodecen-1-ol	18	8	-10	-16
9	n-eicosane	36	42	6	2		17	(3Z,6Z,8E)-dodecatrien-1-ol	17	9	-8	-12
9	1-octadecanol	35	34	-1	-12		17	n-eicosane	7	8	1	6
9	n-docosane	34	35	1	-8		17	1-octadecanol	17	9	-8	-12
9	(3R,6E)-nerolidol	19	30	11	12		17	n-docosane	14	10	-4	-4
9	neocembrene	22	54	32	54		17	(3R,6E)-nerolidol	8	8	0	4
9	δ-cadinene	19	15	-4	-18		17	δ-cadinene	9	14	5	14
9	dodec-3-yn-1-ol	35	31	-4	-18		17	dodec-3-yn-1-ol	9	10	1	6
9	geranylgeraniol	20	44	24	38
