# Supplementary material for: Identification of the trail-following pheromone receptor in termites
Source: eLife. 2025 Aug 19;13:RP101814. doi: 10.7554/eLife.101814 (PMC12364489; doi:10.7554/eLife.101814)
Supplement: Figure 5—source data 2. [file elife-101814-fig5-data2.xlsx]

## Sheet: Sheet1
	Δ Spikes/s
	replicate	1	2	3	4	5	6	7	8	9	10	11
Dose	0.01 ng	62	44		18		14	8	30	10	4	18
	0.1 ng	76	24	20	64	90	22	42	36	12	10	42
	1 ng	90	46	54	86	106	14	30	38	20	12	36
	10 ng	84	44	50	88	120	22	14		16	28	46
	100 ng	104	54	34	112	124	36	8		36	38	40
