# Supplementary material for: Identification of the trail-following pheromone receptor in termites
Source: eLife. 2025 Aug 19;13:RP101814. doi: 10.7554/eLife.101814 (PMC12364489; doi:10.7554/eLife.101814)
Supplement: Figure 6—source data 2. [file elife-101814-fig6-data2.xlsx]

## Sheet: Sheet1
Interaction energy (kcal/mol)	neocembrene	geranylgeraniol	(+)-limonene
	mean ± SD
Cys154	-0.90 ± 0.58	-0.71 ± 0.35	-0.17 ± 0.27
Ala157	-0.68 ± 0.46	-1.02 ± 0.38	-0.45 ± 0.38
Val158	-1.16 ± 0.77	-1.72 ± 0.56	-0.23 ± 0.44
Gly161	×	-0.82 ± 0.38	×
Phe162	×	-1.08 ± 0.67	×
Ile165	×	-0.66 ± 0.49	×
Ile217	×	-1.03 ± 0.47	×
Val220	×	-0.72 ± 0.31	×
Thr221	-1.00 ± 0.53	-1.19 ± 0.47	-0.17 ± 0.35
Leu224	-1.09 ± 0.58	-1.41 ± 0.39	-0.78 ± 0.46
Ala225	-0.93 ± 0.6	-0.97 ± 0.45	-0.17 ± 0.29
Tyr228	-1.10 ± 0.72	-1.06 ± 0.49	-0.47 ± 0.4
