# Supplementary material for: Identification of the trail-following pheromone receptor in termites
Source: eLife. 2025 Aug 19;13:RP101814. doi: 10.7554/eLife.101814 (PMC12364489; doi:10.7554/eLife.101814)
Supplement: Figure 6—source data 3. [file elife-101814-fig6-data3.xlsx]

## Sheet: Sheet1
	Explored volume per atom (nm3 ×10-3)
Atom position	V(apoform)/step	V(neo)/step	V(ger)/step	V(lim)/step
0	0.0077018	0.00265769	0.00327542	0.00442455
1	0.00824617	0.00287845	0.0035187	0.00475093
2	0.00818059	0.00287997	0.00351147	0.0047886
3	0.00822304	0.00290672	0.00351015	0.00478967
4	0.00675607	0.00226464	0.00281486	0.00381587
5	0.007318	0.00249418	0.00304093	0.00411142
6	0.00682303	0.00237017	0.00285087	0.00386778
7	0.00716262	0.00255829	0.00300932	0.00414886
8	0.00739464	0.00258754	0.00313147	0.00424929
9	0.00705184	0.00260095	0.00298252	0.00401643
10	0.00739593	0.00279037	0.00314445	0.00416075
11	0.00760917	0.00284997	0.00323569	0.00441643
12	0.00765141	0.00297693	0.00332031	0.00437165
13	0.00860944	0.00349743	0.00376046	0.00507681
14	0.00915603	0.00376873	0.00400378	0.0054294
15	0.00917706	0.00379006	0.00402983	0.00549202
16	0.00925624	0.00375694	0.00402784	0.00546191
17	0.00602694	0.00189962	0.00240218	0.00324427
18	0.00610558	0.00192404	0.00241156	0.00324371
19	0.00577962	0.00177816	0.0022588	0.00305676
20	0.00614577	0.00195591	0.00245508	0.00334474
21	0.00550657	0.00159739	0.00205206	0.00272355
22	0.00584991	0.0016815	0.00213018	0.00280704
23	0.00646872	0.00189555	0.00238988	0.00307236
24	0.00687891	0.00206574	0.00252721	0.0032747
25	0.00693917	0.00208178	0.00258902	0.003317
26	0.00737904	0.00232961	0.0027911	0.00359194
27	0.00735246	0.00227047	0.00278421	0.00357652
28	0.00754554	0.00229608	0.00281618	0.00363183
29	0.00779013	0.00227657	0.00280991	0.00360828
30	0.00827532	0.00250854	0.00301706	0.00385953
31	0.00833917	0.0024721	0.00298006	0.00384673
32	0.00897584	0.00264539	0.00322564	0.00411724
33	0.00959093	0.00291049	0.00348316	0.00445125
34	0.00961075	0.00288189	0.00349395	0.00450044
35	0.00973982	0.00293359	0.0034646	0.004512
36	0.00448381	0.00125799	0.00166242	0.00222934
37	0.00431522	0.00126015	0.00162509	0.00226618
38	0.00420688	0.00112453	0.00152858	0.00199091
39	0.00470115	0.00125986	0.00169457	0.00216437
40	0.00358133	0.000938558	0.00130792	0.00167284
41	0.00327085	0.000883286	0.00122131	0.0016378
42	0.00346865	0.000917963	0.00133357	0.00160637
43	0.00324641	0.000870448	0.00128743	0.00144919
44	0.00397175	0.00107435	0.00152542	0.00176713
45	0.00357462	0.000956258	0.0014168	0.00175502
46	0.00383288	0.00106635	0.00160488	0.00191209
47	0.00398812	0.0010719	0.00155687	0.00196082
48	0.00352056	0.000955663	0.00142058	0.00172607
49	0.0037003	0.00103463	0.00149573	0.0018001
50	0.00354981	0.00102099	0.00147304	0.00167659
51	0.00393175	0.00104466	0.00160025	0.0020188
52	0.00423551	0.00112258	0.00173286	0.00222473
53	0.00430759	0.00119547	0.00177756	0.00219181
54	0.00449457	0.00130398	0.00184605	0.00258956
55	0.00429429	0.001273	0.00176919	0.0027549
56	0.00510014	0.00152046	0.00209037	0.00282299
57	0.00497538	0.00141046	0.00207786	0.00222091
58	0.00519886	0.00146201	0.00218404	0.00206476
59	0.00550967	0.00161045	0.00230241	0.00249552
60	0.00397289	0.00102589	0.00139311	0.00166793
61	0.0046552	0.00121023	0.00162646	0.00181157
62	0.00398097	0.00102761	0.00135879	0.00164361
63	0.0045083	0.00116892	0.00151877	0.00174748
64	0.00364944	0.00096338	0.00127912	0.00161628
65	0.00407423	0.00107045	0.00141395	0.00170034
66	0.00401552	0.00112158	0.00144845	0.00188816
67	0.00397139	0.00113913	0.00147622	0.00194829
68	0.00457783	0.00129241	0.00161716	0.00210565
69	0.00453306	0.00131377	0.00166733	0.0021159
70	0.00502005	0.00144942	0.00182577	0.00232642
71	0.00301835	0.00078738	0.0010888	0.00139459
72	0.00278116	0.000755022	0.0010579	0.00131874
73	0.00308737	0.000780414	0.00111447	0.00142737
74	0.00355135	0.00089552	0.00126953	0.0016025
75	0.00289254	0.000715628	0.00107085	0.00135177
76	0.0027452	0.000681434	0.0010396	0.00123514
77	0.00357156	0.000868196	0.00129841	0.00162832
78	0.00364547	0.000930778	0.00137632	0.00173961
79	0.00401329	0.000990194	0.00142624	0.00181667
80	0.00417009	0.00102314	0.00151462	0.0017803
81	0.0046524	0.00116779	0.00167506	0.00198943
82	0.00442792	0.00112167	0.00164101	0.00186783
83	0.00478433	0.00120175	0.00173381	0.00194168
84	0.0050632	0.00132257	0.00186126	0.00207781
85	0.00503892	0.00130005	0.00185165	0.00205822
86	0.00569878	0.00148277	0.00204529	0.00225777
87	0.00610613	0.0016493	0.00223284	0.0024403
88	0.00614486	0.00163406	0.00221182	0.00251906
89	0.00642005	0.00173479	0.00232338	0.00252873
90	0.00686619	0.00191245	0.00251918	0.00269591
91	0.00688294	0.00190377	0.0025311	0.00272551
92	0.00691418	0.00191246	0.00250423	0.00279051
93	0.00274025	0.00069545	0.0010183	0.00132023
94	0.0030466	0.000789894	0.00111045	0.00149024
95	0.00260669	0.00067326	0.000986174	0.00121642
96	0.00276024	0.000727254	0.00103315	0.00127396
97	0.0025574	0.000673029	0.000984131	0.00111822
98	0.00277912	0.000734881	0.00105219	0.00120301
99	0.00293675	0.000788663	0.00113427	0.00120914
100	0.00320131	0.000893529	0.00123266	0.00123881
101	0.00304599	0.000854537	0.00126485	0.0012843
102	0.00343004	0.000898904	0.0012535	0.00137674
103	0.00359426	0.000981498	0.00135044	0.00149316
104	0.0037886	0.00100194	0.00137563	0.00151908
105	0.00402992	0.00106956	0.00145732	0.00155974
106	0.00432081	0.00118396	0.0015867	0.00173401
107	0.00429555	0.00118844	0.00157115	0.00166682
108	0.00468604	0.00123661	0.00168842	0.00176606
109	0.00487321	0.0013109	0.00178103	0.00186298
110	0.00552164	0.001475	0.00200801	0.00207866
111	0.00593115	0.00163181	0.00219069	0.00248416
112	0.00557713	0.00156656	0.00208302	0.00256795
113	0.00689997	0.00192836	0.0025599	0.00284646
114	0.00647216	0.00175407	0.00238106	0.00223618
115	0.00654432	0.00178804	0.00241887	0.0021427
116	0.0073995	0.00203067	0.00274308	0.00261023
117	0.00226874	0.000626197	0.000905274	0.000950608
118	0.00230205	0.000626726	0.000926396	0.000908492
119	0.00227528	0.000688833	0.000944499	0.000943876
120	0.00251841	0.000774668	0.00103782	0.00104962
121	0.00229531	0.000728549	0.000976024	0.000877227
122	0.00221409	0.000678205	0.000923434	0.000811386
123	0.00252678	0.000855057	0.00109851	0.000928948
124	0.00279605	0.000951453	0.00121839	0.000978463
125	0.00281267	0.000990211	0.00124366	0.00103844
126	0.00260482	0.000899567	0.00112022	0.000971365
127	0.0029566	0.00102026	0.00127055	0.0011005
128	0.0027504	0.000947696	0.00116931	0.0010381
129	0.00288592	0.00102821	0.00125501	0.00105812
130	0.00319179	0.00114134	0.00138877	0.00117705
131	0.00317238	0.00113794	0.00137614	0.00115126
132	0.00321611	0.00120736	0.00145219	0.00117126
133	0.00350805	0.00133414	0.00161806	0.00129001
134	0.00354833	0.00132867	0.00158524	0.00127602
135	0.00374589	0.0014146	0.00165876	0.00135621
136	0.00411813	0.00155612	0.0018221	0.00149404
137	0.00411735	0.00154131	0.00180523	0.00148816
138	0.0040233	0.00156076	0.00181068	0.00153092
139	0.00262535	0.000860954	0.00115673	0.000974541
140	0.00302337	0.000996559	0.00133319	0.00116229
141	0.00278391	0.000925559	0.00125635	0.00099163
142	0.00321358	0.00108778	0.00146839	0.00114774
143	0.00274606	0.000886638	0.00121557	0.000915474
144	0.00300304	0.000960739	0.00133164	0.00102538
145	0.00316463	0.00103642	0.00133891	0.000939793
146	0.00340198	0.00109998	0.00142494	0.000962718
147	0.00333756	0.00109238	0.00137687	0.00100331
148	0.00382881	0.00127321	0.00162061	0.00112569
149	0.00415967	0.00141654	0.001752	0.00126695
150	0.00414668	0.00140146	0.0018151	0.00126753
151	0.00448514	0.00151348	0.00186737	0.00129357
152	0.0051265	0.00173636	0.00215003	0.00153243
153	0.00506599	0.0017577	0.00211885	0.00149424
154	0.00250163	0.000796427	0.00111839	0.000846846
155	0.00260845	0.00083212	0.0011683	0.000848931
156	0.00256399	0.000819857	0.00114172	0.000899887
157	0.00281545	0.000919898	0.00124956	0.000996821
158	0.00263527	0.000851006	0.00117557	0.000942556
159	0.00277454	0.000886284	0.00121493	0.000988266
160	0.00322686	0.0010729	0.00142907	0.00120389
161	0.00350524	0.00119101	0.00156419	0.0013396
162	0.00358488	0.00119336	0.00157633	0.00133935
163	0.0038321	0.00126698	0.00167148	0.00143318
164	0.00417209	0.00138881	0.00181075	0.0015632
165	0.00245393	0.000827898	0.00114008	0.000858824
166	0.00263239	0.000941704	0.00125985	0.000920313
167	0.00251718	0.000837767	0.00114351	0.000881446
168	0.00270869	0.000887995	0.00121005	0.000970593
169	0.00271022	0.000926183	0.0012266	0.000916133
170	0.00288599	0.00100736	0.00132216	0.000973174
171	0.0031123	0.00110697	0.00141703	0.00104111
172	0.00351804	0.00128196	0.00159457	0.0011589
173	0.00337426	0.00117715	0.00150652	0.00112388
174	0.00347708	0.00126227	0.00160961	0.00115461
175	0.00404317	0.00147297	0.00185025	0.00135579
176	0.00365913	0.00135111	0.0017054	0.00121716
177	0.00385372	0.00138759	0.00177721	0.00129029
178	0.00424207	0.00157068	0.00197848	0.00150358
179	0.00447375	0.00160539	0.00204327	0.00152981
180	0.00472291	0.00174455	0.00215378	0.00161249
181	0.00507145	0.00178103	0.00229597	0.00179118
182	0.0028448	0.000987782	0.00128287	0.0010147
183	0.00322593	0.00113316	0.00138769	0.00118494
184	0.0030256	0.00107259	0.00141726	0.00110377
185	0.00320343	0.00112443	0.00149721	0.00112377
186	0.00345302	0.0012667	0.00162712	0.00135685
187	0.00376922	0.0014	0.00174247	0.00152072
188	0.00410893	0.00155792	0.00199335	0.00165853
189	0.00461536	0.00174439	0.00219411	0.00182567
190	0.00454044	0.00175368	0.00220118	0.00185088
191	0.00452937	0.00174508	0.00221328	0.00189748
192	0.00336022	0.00126322	0.00161872	0.00133863
193	0.00331474	0.00125934	0.00162166	0.00126666
194	0.00375194	0.00146595	0.00179742	0.0015618
195	0.00418773	0.00162965	0.00195303	0.00176613
196	0.00399932	0.00165189	0.00195634	0.00168658
197	0.00372271	0.0015693	0.00183805	0.00154347
198	0.00487637	0.00206455	0.00237301	0.00212599
199	0.00538606	0.00232283	0.00262157	0.0023842
200	0.00539503	0.00224567	0.00260078	0.0023605
201	0.00537086	0.00223233	0.00257126	0.00235235
202	0.00576049	0.00237324	0.00275569	0.00249354
203	0.00632638	0.00262693	0.00295335	0.00285071
204	0.00674722	0.00284766	0.0031764	0.00307737
205	0.00700973	0.00288758	0.00321827	0.00317584
206	0.00434276	0.00184039	0.00215074	0.00185254
207	0.00494673	0.00206485	0.00241312	0.00212554
208	0.00438758	0.00192761	0.00219777	0.001869
209	0.00495635	0.00218731	0.00244966	0.0021202
210	0.00403051	0.00183415	0.00206809	0.00169479
211	0.00404006	0.00187402	0.00211499	0.00175597
212	0.00487895	0.00226411	0.00245098	0.00202408
213	0.00515204	0.00235651	0.00251919	0.00205891
214	0.00530139	0.00246038	0.00266115	0.00218984
215	0.00585342	0.00271884	0.00290232	0.00255559
216	0.00629867	0.00290646	0.00314512	0.00286772
217	0.00613996	0.0028372	0.0030114	0.00271172
218	0.00692436	0.00323835	0.00338446	0.00301943
219	0.00772251	0.00362788	0.00379489	0.00339629
220	0.0078141	0.00361391	0.00374808	0.00346439
221	0.00339262	0.001539	0.00177607	0.00136759
222	0.00356615	0.00160291	0.0018418	0.0014084
223	0.00304277	0.00142833	0.0016692	0.00124973
224	0.00324907	0.00156308	0.00181004	0.00141957
225	0.00275538	0.00132879	0.00155375	0.00110044
226	0.00291396	0.00139076	0.001636	0.00112686
227	0.00292564	0.00146047	0.00172506	0.00126488
228	0.00325046	0.00162576	0.00192381	0.00143928
229	0.00340401	0.0016621	0.0019411	0.00148922
230	0.00368256	0.00180601	0.00211266	0.0016531
231	0.0033096	0.00164322	0.0018831	0.00144675
232	0.00363292	0.00184456	0.00205449	0.00162078
233	0.0036532	0.0018134	0.00205456	0.00167678
234	0.00374963	0.00181284	0.00207487	0.0016525
235	0.00267164	0.00128839	0.00144858	0.00101303
236	0.00298919	0.00143459	0.00155796	0.0011576
237	0.00268996	0.00127794	0.00143423	0.000967143
238	0.00282595	0.00134379	0.00152677	0.00102172
239	0.00293618	0.00136547	0.00147401	0.00101215
240	0.00317455	0.00149606	0.0015763	0.00113847
241	0.00363313	0.00163018	0.001719	0.00119053
242	0.0040842	0.00184234	0.00190252	0.00135083
243	0.00380877	0.00169422	0.00181004	0.00123988
244	0.00426757	0.00190157	0.00195255	0.00140398
245	0.0047775	0.00213892	0.00217473	0.00160799
246	0.00441813	0.00198045	0.00203248	0.00148296
247	0.00491749	0.00221725	0.00224294	0.00168971
248	0.00528057	0.00239366	0.00239943	0.00185111
249	0.00526341	0.00234717	0.00238756	0.00186301
250	0.00583344	0.00266734	0.00265693	0.00209718
251	0.00643576	0.00290918	0.00289575	0.00229315
252	0.00623839	0.00288748	0.00284772	0.00232231
253	0.00652799	0.00304429	0.00301348	0.00250285
254	0.00701651	0.00330339	0.00322891	0.00274376
255	0.00689592	0.0032781	0.00324798	0.00277474
256	0.00713518	0.00327373	0.0032403	0.0027519
257	0.00273091	0.00128291	0.00139384	0.000930144
258	0.00295191	0.00140633	0.00150157	0.000969181
259	0.00267163	0.00127388	0.00139291	0.0009856
260	0.00284211	0.00137306	0.00149762	0.00111719
261	0.00271719	0.00132193	0.00143547	0.00104733
262	0.00294957	0.0014423	0.00153375	0.00111484
263	0.00319158	0.00161059	0.00171776	0.00133835
264	0.00347239	0.0017631	0.00187842	0.00149827
265	0.00345595	0.00177555	0.00185762	0.00148983
266	0.00423886	0.00213366	0.00228626	0.00192616
267	0.0036852	0.00188451	0.00199955	0.00203004
268	0.00496432	0.0025343	0.00271594	0.0016025
269	0.00582246	0.00295314	0.00315713	0.00237401
270	0.00504637	0.0026131	0.00276422	0.00287671
271	0.00587437	0.00304204	0.00319771	0.00240142
272	0.00430495	0.00222938	0.00233919	0.00196503
273	0.00460747	0.00238662	0.0024813	0.00216794
274	0.00249215	0.00121718	0.001336	0.000976596
275	0.00277125	0.00132551	0.0014771	0.00110546
276	0.0023093	0.00119606	0.00128216	0.000946177
277	0.00241247	0.00129941	0.00137893	0.00101018
278	0.00228128	0.001204	0.00128791	0.000971493
279	0.00254744	0.00130462	0.00142655	0.00108709
280	0.00265002	0.00142315	0.00153005	0.00116489
281	0.00298094	0.00159011	0.00172406	0.00134626
282	0.00311535	0.00165387	0.00174796	0.00138579
283	0.00340865	0.00180565	0.00188304	0.00156194
284	0.00296772	0.00163811	0.00175881	0.00135915
285	0.00332957	0.00180431	0.00195255	0.00151635
286	0.00330873	0.00183901	0.00195252	0.00155324
287	0.00328858	0.00181927	0.00192847	0.00154555
288	0.00205222	0.00109869	0.00114237	0.00087434
289	0.00204809	0.0011796	0.00120852	0.00093899
290	0.0021599	0.00111054	0.00115357	0.000884327
291	0.00244298	0.00121344	0.00127644	0.000979187
292	0.00216903	0.00114243	0.00116045	0.000900038
293	0.002222	0.00122244	0.00125261	0.000963751
294	0.00272478	0.00140537	0.00140319	0.00114536
295	0.00303492	0.00155823	0.00153462	0.00127385
296	0.00299704	0.0015336	0.00151357	0.00126391
297	0.00326527	0.00170186	0.00169361	0.00143012
298	0.00339444	0.00177657	0.00172298	0.00151083
299	0.00396345	0.0020771	0.00205827	0.00180628
300	0.00439238	0.00228271	0.0022686	0.00206076
301	0.00440652	0.00230716	0.00227444	0.00208474
302	0.00439113	0.00231092	0.0022711	0.00206222
303	0.00387402	0.00200915	0.001995	0.00172029
304	0.0042813	0.00223625	0.00219806	0.00193718
305	0.00427477	0.00220657	0.00220098	0.001966
306	0.00432908	0.0022283	0.00221218	0.00199043
307	0.0019911	0.00106047	0.00105152	0.000815805
308	0.00225033	0.00118788	0.00115964	0.000919647
309	0.00175594	0.00102003	0.00099696	0.000788
310	0.00180049	0.00110079	0.00108209	0.000876291
311	0.00168676	0.00102942	0.000982558	0.000803417
312	0.00194721	0.00112164	0.0010757	0.000889338
313	0.00197266	0.00125725	0.00119699	0.00100767
314	0.0022932	0.00143529	0.0013533	0.00117037
315	0.00226226	0.00146225	0.00139237	0.00123889
316	0.00250874	0.00159628	0.00151152	0.00137184
317	0.00226114	0.00147865	0.00141185	0.00124213
318	0.00258115	0.00167583	0.0015803	0.00140604
319	0.00252084	0.00166761	0.00156909	0.00142039
320	0.00255332	0.00164257	0.00158604	0.00144276
321	0.00141582	0.000900817	0.000852735	0.000678448
322	0.00141108	0.00095017	0.000913841	0.00071515
323	0.00144494	0.00089321	0.000810617	0.000652526
324	0.00167876	0.00100273	0.000899804	0.000754506
325	0.00139449	0.000876118	0.00077048	0.000608443
326	0.00144193	0.000925336	0.00082409	0.000671574
327	0.00180986	0.00107974	0.000960725	0.000779093
328	0.00202861	0.00118452	0.00106095	0.000858446
329	0.00208189	0.00121812	0.00110036	0.000913704
330	0.00212503	0.00128674	0.00114914	0.000958499
331	0.00228224	0.00138223	0.00124044	0.00105322
332	0.00121006	0.000788896	0.000654832	0.000512304
333	0.00135652	0.000869715	0.00071911	0.000563927
334	0.00110814	0.000755101	0.000610601	0.000496308
335	0.00118255	0.000807921	0.000676209	0.000574366
336	0.00109108	0.000768301	0.000601146	0.000488935
337	0.00123597	0.000855594	0.000682818	0.000545531
338	0.00130245	0.000959055	0.000756853	0.000657666
339	0.00144445	0.00106973	0.000843935	0.000761742
340	0.00138518	0.00101024	0.000806679	0.000724571
341	0.00167603	0.00122023	0.00097271	0.000860219
342	0.00182882	0.00130424	0.00105439	0.000942956
343	0.00185757	0.00132511	0.0010648	0.000947706
344	0.00210461	0.0015249	0.00123504	0.0011414
345	0.00245173	0.00175519	0.00146284	0.00137367
346	0.00250606	0.00178665	0.00144044	0.00137553
347	0.000943352	0.000658964	0.000500523	0.000408686
348	0.00102596	0.000735072	0.00054443	0.000466698
349	0.000907322	0.000597806	0.000467956	0.00036759
350	0.00101075	0.000658589	0.000533412	0.000419535
351	0.000899445	0.000574621	0.000439013	0.000338012
352	0.000993575	0.000648541	0.000476034	0.000387619
353	0.00112202	0.00070681	0.000558537	0.000426117
354	0.00126403	0.000779729	0.000626261	0.000463105
355	0.00122903	0.000775119	0.000613179	0.000467661
356	0.0013851	0.000901279	0.000707243	0.000596954
357	0.00150504	0.000989185	0.000777755	0.000697424
358	0.00153991	0.00101486	0.000791835	0.00068352
359	0.00177011	0.00111531	0.000905394	0.000738966
360	0.00212008	0.00132869	0.00108215	0.000913398
361	0.00209931	0.00131553	0.00108194	0.000903981
362	0.000826801	0.0005011	0.000386789	0.000286169
363	0.000958076	0.00057556	0.000453334	0.000326927
364	0.00077795	0.000468814	0.000354305	0.000283018
365	0.000826552	0.000516331	0.000390528	0.000321706
366	0.000788747	0.000456095	0.000351941	0.00029178
367	0.000928223	0.000543364	0.000426139	0.000356173
368	0.000956529	0.000569338	0.000447903	0.000393204
369	0.00104507	0.000619986	0.000493673	0.00044324
370	0.000976939	0.000587741	0.000458486	0.000405254
371	0.00128032	0.000795503	0.000640959	0.000570674
372	0.00150503	0.000933762	0.000763899	0.000715446
373	0.00138573	0.000875803	0.00070699	0.000623673
374	0.00155201	0.000961389	0.000777171	0.000712229
375	0.00178667	0.00109194	0.000893529	0.000861347
376	0.00185883	0.0011744	0.000959901	0.00090553
377	0.00196381	0.00130104	0.00103378	0.000971589
378	0.00218525	0.00131705	0.00112378	0.0011058
379	0.000623596	0.000347621	0.000265428	0.000214692
380	0.000557422	0.000313435	0.000233058	0.000186074
381	0.000688686	0.000385225	0.000293849	0.00024561
382	0.000968059	0.000541493	0.000426688	0.000377976
383	0.0010815	0.00061546	0.00048781	0.00043072
384	0.00109604	0.000614372	0.00049705	0.000451422
385	0.000647875	0.000363055	0.000263426	0.000222363
386	0.000674815	0.000383014	0.000270514	0.000225403
387	0.000925446	0.000506526	0.000382859	0.000348508
388	0.00109268	0.00059734	0.000451749	0.00041576
389	0.00102819	0.000554245	0.00042846	0.000403608
390	0.0011275	0.000622809	0.000488021	0.000450959
391	0.00130914	0.000728635	0.00057446	0.000538636
392	0.00139864	0.000771608	0.000619214	0.000593484
393	0.000524451	0.000295705	0.000206996	0.000178249
394	0.000607296	0.000343112	0.000250353	0.000225306
395	0.000476167	0.000269092	0.000175686	0.000150843
396	0.000554295	0.00031353	0.000205908	0.000183602
397	0.000438016	0.000254355	0.000160002	0.000147562
398	0.000503502	0.0002876	0.000188932	0.00018334
399	0.000628675	0.000344497	0.000227611	0.000216779
400	0.000733946	0.000400692	0.000277461	0.000259057
401	0.000785645	0.000424865	0.000288871	0.000279683
402	0.000826369	0.000438672	0.000300879	0.000307264
403	0.00092959	0.00049746	0.00034331	0.000368816
404	0.000319402	0.000201382	0.000123187	0.000110781
405	0.000341068	0.000222245	0.000139561	0.00012716
406	0.000314681	0.000187507	0.000114184	0.000105798
407	0.00040329	0.000226933	0.000145597	0.000141541
408	0.000294751	0.000175102	0.000102143	9.30157e-05
409	0.000335777	0.000194247	0.000114378	0.000104087
410	0.000444647	0.000248286	0.000143434	0.000141681
411	0.000537089	0.000289338	0.00017312	0.000162499
412	0.000520902	0.000292471	0.000178842	0.000177341
413	0.000614512	0.000330043	0.000203417	0.000204099
414	0.000815207	0.000434396	0.000273575	0.000284741
415	0.000821785	0.000430861	0.000280425	0.000292232
416	0.000232617	0.000135581	8.03614e-05	7.29064e-05
417	0.000299359	0.000162127	0.000101675	9.36116e-05
418	0.000204792	0.000122549	6.79739e-05	6.13789e-05
419	0.000254155	0.000150086	8.31814e-05	7.73581e-05
420	0.000209306	0.000114086	6.54681e-05	5.74913e-05
421	0.000242527	0.000130426	7.72079e-05	6.70648e-05
422	0.000323657	0.000169551	9.65809e-05	8.58439e-05
423	0.000402216	0.000205011	0.000118029	0.000111484
424	0.000408389	0.000213719	0.000126186	0.000110335
425	0.00053414	0.000267401	0.000164968	0.000154733
426	0.000639308	0.000317538	0.000210638	0.000209812
427	0.00016483	8.93325e-05	5.25189e-05	4.71012e-05
428	0.000200658	0.000112154	6.82194e-05	6.71967e-05
429	0.000148893	7.64014e-05	4.70641e-05	3.97808e-05
430	0.000183739	9.69233e-05	6.17201e-05	5.60875e-05
431	0.000137073	6.84968e-05	4.19525e-05	3.56686e-05
432	0.00016358	8.03421e-05	4.79136e-05	3.91985e-05
433	0.000194785	8.94371e-05	5.54394e-05	4.91934e-05
434	0.000260932	0.00011381	7.2601e-05	6.50638e-05
435	0.000277293	0.000118355	7.67563e-05	7.30809e-05
436	0.000252374	0.000121167	7.50316e-05	6.12056e-05
437	0.000362944	0.000167987	0.000111884	9.64018e-05
438	0.000375407	0.000171772	0.000111769	9.65047e-05
439	0.000100848	5.53863e-05	3.41602e-05	2.97292e-05
440	0.000115001	6.33409e-05	4.21636e-05	3.78656e-05
441	9.17566e-05	5.09877e-05	3.0106e-05	2.4177e-05
442	0.000120896	6.37705e-05	3.71248e-05	2.94156e-05
443	7.66561e-05	4.42555e-05	2.6715e-05	2.03572e-05
444	7.59646e-05	4.60524e-05	2.79716e-05	2.0562e-05
445	0.000109001	6.26362e-05	3.52175e-05	2.55688e-05
446	0.000166161	8.74524e-05	5.30545e-05	4.02315e-05
447	0.00014994	8.84015e-05	5.06063e-05	3.92848e-05
448	0.000228313	0.000121518	7.49683e-05	6.44338e-05
449	0.000218284	0.000123522	7.62857e-05	6.68969e-05
450	0.000225945	0.000123415	7.61371e-05	6.43013e-05
451	0.000169689	0.000100639	6.00286e-05	4.34645e-05
452	0.000245959	0.000138142	8.86924e-05	7.29574e-05
453	0.000246815	0.000141304	8.98564e-05	7.29075e-05
454	0.000248581	0.000137325	8.93391e-05	7.29265e-05
455	6.53294e-05	3.51583e-05	2.41887e-05	1.9059e-05
456	8.27312e-05	4.46366e-05	2.89874e-05	2.40742e-05
457	5.66548e-05	3.01078e-05	2.33659e-05	1.85132e-05
458	6.27054e-05	3.53374e-05	2.69913e-05	2.05246e-05
459	5.49741e-05	2.98433e-05	2.42897e-05	1.99657e-05
460	6.55895e-05	3.55867e-05	2.70952e-05	2.26136e-05
461	7.05601e-05	4.25153e-05	3.52702e-05	2.85197e-05
462	0.000104301	5.62646e-05	4.77325e-05	4.19716e-05
463	9.498e-05	5.36263e-05	4.56289e-05	3.65474e-05
464	9.5539e-05	5.72082e-05	4.61628e-05	3.92834e-05
465	0.000149579	8.1973e-05	6.93626e-05	6.28345e-05
466	0.000145829	7.67296e-05	6.57296e-05	5.62058e-05
467	0.00013895	7.65524e-05	6.07775e-05	5.43842e-05
468	0.000201767	0.000103496	8.55529e-05	8.15373e-05
469	0.000201874	0.000105898	8.49102e-05	8.0907e-05
470	0.000195667	0.000107223	8.1455e-05	7.32809e-05
471	0.000271481	0.000145178	0.000114337	0.000105876
472	0.00028441	0.000144275	0.000112128	0.000103253
473	0.000277893	0.000137682	0.00010552	9.41875e-05
474	0.000372886	0.000179502	0.000137018	0.000131657
475	0.000370628	0.000177508	0.00014428	0.000134449
476	0.000374305	0.000180269	0.000140808	0.000136728
477	4.66781e-05	2.48856e-05	2.16981e-05	1.76828e-05
478	5.6503e-05	3.14672e-05	2.80892e-05	2.35798e-05
479	4.53457e-05	2.23233e-05	1.9154e-05	1.64925e-05
480	5.74361e-05	2.66641e-05	2.22916e-05	1.98938e-05
481	4.68215e-05	2.3139e-05	1.96986e-05	1.72695e-05
482	4.92883e-05	2.58655e-05	2.1835e-05	1.92312e-05
483	6.63734e-05	3.41668e-05	2.64809e-05	2.29562e-05
484	9.64238e-05	5.20309e-05	3.95222e-05	3.61699e-05
485	0.000104397	5.64754e-05	4.54875e-05	4.04413e-05
486	0.000160293	8.73039e-05	7.22849e-05	6.86776e-05
487	0.000165368	8.71249e-05	7.22795e-05	6.87842e-05
488	0.000171859	8.4965e-05	7.08639e-05	6.7388e-05
489	0.000104187	5.42644e-05	4.03878e-05	3.4951e-05
490	0.000166539	7.85122e-05	6.21661e-05	5.53369e-05
491	0.000148428	7.7205e-05	5.94606e-05	5.53156e-05
492	0.00014832	8.32591e-05	5.81733e-05	5.15389e-05
493	0.000219233	0.000119847	8.76489e-05	8.38503e-05
494	0.000223001	0.000118113	8.57333e-05	8.51745e-05
495	0.000221382	0.000120565	8.71612e-05	8.41825e-05
496	4.45547e-05	2.03405e-05	1.80373e-05	1.63788e-05
497	5.46709e-05	2.4223e-05	1.98316e-05	1.65295e-05
498	4.22227e-05	2.01794e-05	1.87178e-05	1.73838e-05
499	4.5133e-05	2.28858e-05	2.06743e-05	1.97695e-05
500	4.54478e-05	2.23762e-05	2.01283e-05	1.88257e-05
501	5.491e-05	2.56677e-05	2.23952e-05	2.0587e-05
502	6.02523e-05	3.11501e-05	2.81319e-05	2.52807e-05
503	9.2356e-05	4.83618e-05	4.14969e-05	3.97744e-05
504	8.59351e-05	4.3981e-05	3.8209e-05	3.72493e-05
505	0.000104279	5.52478e-05	4.95862e-05	4.4201e-05
506	0.000159179	8.41532e-05	7.41994e-05	7.14335e-05
507	0.000154123	7.93782e-05	7.10633e-05	6.80204e-05
508	0.000199471	0.00010616	9.84931e-05	9.21632e-05
509	0.000304707	0.000161478	0.000147582	0.00014736
510	0.000426465	0.000216479	0.000200812	0.000206189
511	0.000427339	0.000221828	0.000203908	0.00021145
512	0.000416312	0.000216616	0.000202311	0.00021124
513	3.85083e-05	2.0296e-05	1.7722e-05	1.71201e-05
514	4.42597e-05	2.24082e-05	1.89267e-05	1.7881e-05
515	3.58717e-05	1.97781e-05	1.808e-05	1.76417e-05
516	3.92363e-05	2.08628e-05	1.97599e-05	1.92748e-05
517	3.74702e-05	2.11138e-05	1.95966e-05	1.94012e-05
518	4.34665e-05	2.43899e-05	2.26574e-05	2.25792e-05
519	4.65089e-05	2.71083e-05	2.60258e-05	2.59676e-05
520	6.99651e-05	3.82218e-05	3.68162e-05	3.61246e-05
521	7.74387e-05	4.32485e-05	4.30532e-05	4.49055e-05
522	0.000100583	5.65321e-05	5.59756e-05	5.91323e-05
523	8.72564e-05	4.51538e-05	4.49662e-05	4.6599e-05
524	0.0001347	6.97817e-05	6.94845e-05	7.51984e-05
525	0.000135214	6.99373e-05	6.89454e-05	7.59463e-05
526	0.000137474	6.91591e-05	6.95216e-05	7.64051e-05
527	3.35118e-05	1.82132e-05	1.66294e-05	1.62237e-05
528	3.86782e-05	2.05293e-05	1.90382e-05	1.83196e-05
529	3.01168e-05	1.5916e-05	1.40324e-05	1.36579e-05
530	3.15414e-05	1.68699e-05	1.46901e-05	1.46278e-05
531	3.09767e-05	1.49813e-05	1.28457e-05	1.23447e-05
532	3.4751e-05	1.70822e-05	1.49524e-05	1.41026e-05
533	3.72473e-05	1.75021e-05	1.46002e-05	1.42544e-05
534	5.56604e-05	2.73885e-05	2.21269e-05	2.12045e-05
535	4.96423e-05	2.66838e-05	2.19716e-05	2.29767e-05
536	4.59517e-05	2.19842e-05	1.96458e-05	1.95106e-05
537	7.62985e-05	3.6198e-05	3.26769e-05	3.46515e-05
538	7.90539e-05	3.75112e-05	3.37077e-05	3.27177e-05
539	0.000131001	6.18069e-05	5.56664e-05	5.75344e-05
540	0.000134201	6.28767e-05	5.50561e-05	5.77024e-05
541	0.000131116	6.16774e-05	5.62278e-05	5.92507e-05
542	7.22718e-05	3.53538e-05	3.05306e-05	3.02379e-05
543	0.000121028	5.71856e-05	5.07032e-05	5.34264e-05
544	0.000121261	5.84982e-05	5.13884e-05	5.44347e-05
545	0.000118385	5.8072e-05	5.1734e-05	5.54777e-05
546	3.05672e-05	1.35097e-05	1.14527e-05	1.10567e-05
547	3.35979e-05	1.47207e-05	1.25194e-05	1.1696e-05
548	3.2142e-05	1.3296e-05	1.16749e-05	1.1361e-05
549	3.48083e-05	1.48212e-05	1.27821e-05	1.26265e-05
550	3.56116e-05	1.35381e-05	1.25726e-05	1.19132e-05
551	4.03389e-05	1.46555e-05	1.32906e-05	1.23855e-05
552	4.53577e-05	1.68464e-05	1.59656e-05	1.53883e-05
553	6.94332e-05	2.59332e-05	2.40606e-05	2.36749e-05
554	6.44027e-05	2.43827e-05	2.29177e-05	2.28118e-05
555	7.00515e-05	2.7362e-05	2.50986e-05	2.43108e-05
556	9.6904e-05	3.88489e-05	3.60078e-05	3.69527e-05
557	3.30654e-05	1.27926e-05	1.21588e-05	1.16796e-05
558	3.56903e-05	1.31253e-05	1.25002e-05	1.20707e-05
559	3.44787e-05	1.35963e-05	1.30673e-05	1.26452e-05
560	3.68996e-05	1.49492e-05	1.46291e-05	1.37574e-05
561	3.88333e-05	1.43792e-05	1.36626e-05	1.38001e-05
562	4.28027e-05	1.5535e-05	1.48574e-05	1.52068e-05
563	4.7411e-05	1.82127e-05	1.72759e-05	1.78136e-05
564	6.56712e-05	2.66107e-05	2.465e-05	2.57003e-05
565	8.2049e-05	3.04435e-05	2.88997e-05	3.03762e-05
566	0.00013192	5.24356e-05	4.87995e-05	5.36578e-05
567	0.000133115	5.12613e-05	4.90745e-05	5.32421e-05
568	0.00013567	5.18843e-05	4.88152e-05	5.46685e-05
569	7.55366e-05	3.16766e-05	2.9586e-05	2.96304e-05
570	0.000119496	5.21443e-05	4.96388e-05	5.28227e-05
571	0.000115866	4.83313e-05	4.49104e-05	4.62166e-05
572	0.000117815	5.36307e-05	4.91006e-05	5.12648e-05
573	0.000185285	8.19851e-05	7.78496e-05	8.41817e-05
574	0.000178927	8.3062e-05	7.76379e-05	8.4404e-05
575	0.000178945	8.20906e-05	7.82851e-05	8.42005e-05
576	3.70109e-05	1.28135e-05	1.18701e-05	1.26102e-05
577	4.04163e-05	1.34252e-05	1.23951e-05	1.3676e-05
578	3.57685e-05	1.20019e-05	1.11339e-05	1.17598e-05
579	3.72057e-05	1.26598e-05	1.19922e-05	1.22941e-05
580	3.76718e-05	1.13405e-05	1.06908e-05	1.14642e-05
581	4.54761e-05	1.29595e-05	1.24888e-05	1.35697e-05
582	4.40657e-05	1.2459e-05	1.26233e-05	1.26102e-05
583	6.43321e-05	2.01315e-05	2.15633e-05	2.19654e-05
584	6.69287e-05	1.97694e-05	2.05894e-05	2.12456e-05
585	5.85747e-05	1.65993e-05	1.86261e-05	1.80125e-05
586	9.43003e-05	3.07827e-05	3.2832e-05	3.43865e-05
587	9.51495e-05	2.84234e-05	3.10698e-05	3.19903e-05
588	9.77618e-05	3.03693e-05	3.56583e-05	3.20285e-05
589	0.000147878	4.92013e-05	5.97032e-05	5.72386e-05
590	0.000217354	7.82687e-05	9.13389e-05	9.21618e-05
591	0.000224718	7.72528e-05	9.12397e-05	9.50729e-05
592	0.000216223	7.7959e-05	9.1069e-05	9.19256e-05
593	3.21745e-05	9.8936e-06	8.8215e-06	9.68525e-06
594	3.5275e-05	1.05475e-05	9.35856e-06	1.05673e-05
595	2.9592e-05	9.26749e-06	7.94077e-06	8.48455e-06
596	3.08063e-05	9.96276e-06	8.53035e-06	8.99168e-06
597	3.13848e-05	9.23824e-06	7.57155e-06	7.79938e-06
598	3.376e-05	9.31951e-06	7.62492e-06	7.8658e-06
599	3.77226e-05	1.03896e-05	8.24999e-06	8.21347e-06
600	4.59749e-05	1.26034e-05	9.66698e-06	9.27661e-06
601	4.30603e-05	1.242e-05	1.01964e-05	9.80184e-06
602	4.50561e-05	1.14173e-05	8.51853e-06	8.7868e-06
603	5.51908e-05	1.53452e-05	1.14169e-05	1.15402e-05
604	6.76728e-05	1.60303e-05	1.27506e-05	1.27259e-05
605	0.000108338	2.872e-05	2.42225e-05	2.37207e-05
606	0.000114093	2.91249e-05	2.42809e-05	2.48121e-05
607	0.00010736	2.79724e-05	2.35137e-05	2.33875e-05
608	5.6407e-05	1.48847e-05	9.65086e-06	9.74616e-06
609	8.59086e-05	2.62306e-05	1.91803e-05	2.07031e-05
610	9.24942e-05	2.69657e-05	1.88922e-05	2.05613e-05
611	9.29258e-05	2.69876e-05	1.95294e-05	2.03868e-05
612	3.18503e-05	9.89769e-06	8.51848e-06	8.55892e-06
613	3.6573e-05	1.08209e-05	9.37146e-06	9.30205e-06
614	3.152e-05	1.08643e-05	9.59347e-06	9.5664e-06
615	3.19061e-05	1.15282e-05	1.00702e-05	1.02599e-05
616	3.54093e-05	1.24623e-05	1.11756e-05	1.10305e-05
617	3.96166e-05	1.34056e-05	1.21352e-05	1.15571e-05
618	4.10567e-05	1.50529e-05	1.36214e-05	1.36995e-05
619	5.78746e-05	2.21252e-05	1.94102e-05	1.88444e-05
620	5.54988e-05	2.03645e-05	1.83793e-05	1.67192e-05
621	5.80797e-05	2.20735e-05	1.96384e-05	1.62641e-05
622	8.90877e-05	3.56203e-05	3.24096e-05	2.57883e-05
623	8.70045e-05	3.4431e-05	2.9896e-05	2.41418e-05
624	0.000115651	4.43978e-05	3.86906e-05	3.02418e-05
625	0.000118544	4.89751e-05	4.28002e-05	3.2414e-05
626	3.89029e-05	1.2907e-05	1.16322e-05	1.19126e-05
627	4.65577e-05	1.48881e-05	1.32551e-05	1.3582e-05
628	4.04795e-05	1.29852e-05	1.17121e-05	1.22916e-05
629	3.93932e-05	1.31366e-05	1.18421e-05	1.25738e-05
630	5.06073e-05	1.47891e-05	1.33283e-05	1.42761e-05
631	6.06766e-05	1.74085e-05	1.57449e-05	1.71792e-05
632	5.87492e-05	1.75802e-05	1.56321e-05	1.73427e-05
633	8.975e-05	2.90742e-05	2.74884e-05	3.02926e-05
634	9.39645e-05	2.92737e-05	2.74419e-05	3.04086e-05
635	9.33224e-05	2.9884e-05	2.71483e-05	3.12153e-05
636	5.31114e-05	1.40342e-05	1.21304e-05	1.28276e-05
637	6.94545e-05	1.73208e-05	1.47679e-05	1.58127e-05
638	4.52951e-05	1.18316e-05	9.97925e-06	1.04705e-05
639	4.03112e-05	1.15157e-05	9.67431e-06	1.03134e-05
640	5.17765e-05	1.23289e-05	9.87385e-06	1.03433e-05
641	6.35203e-05	1.53058e-05	1.17796e-05	1.27649e-05
642	5.13443e-05	1.26302e-05	9.80647e-06	1.08821e-05
643	8.21401e-05	2.16718e-05	1.69252e-05	2.06204e-05
644	8.02363e-05	2.12256e-05	1.67169e-05	2.05035e-05
645	8.014e-05	2.17419e-05	1.69049e-05	2.02909e-05
646	5.49725e-05	1.28067e-05	1.01709e-05	1.01508e-05
647	7.04818e-05	1.67662e-05	1.27833e-05	1.30468e-05
648	5.05878e-05	1.26298e-05	1.0412e-05	1.00638e-05
649	4.90751e-05	1.36877e-05	1.14204e-05	1.14709e-05
650	5.91477e-05	1.45633e-05	1.217e-05	1.11312e-05
651	6.18655e-05	1.72049e-05	1.41966e-05	1.35325e-05
652	7.40267e-05	1.81963e-05	1.43542e-05	1.31696e-05
653	5.71922e-05	1.37923e-05	1.15623e-05	1.00498e-05
654	7.52699e-05	1.85564e-05	1.5152e-05	1.27195e-05
655	4.86155e-05	1.33211e-05	9.60607e-06	8.66247e-06
656	4.50961e-05	1.41842e-05	9.5809e-06	9.22194e-06
657	5.59348e-05	1.63394e-05	1.00794e-05	9.02432e-06
658	6.75315e-05	1.84653e-05	1.18156e-05	1.05175e-05
659	5.46903e-05	1.96361e-05	9.10419e-06	8.91589e-06
660	7.18433e-05	2.70556e-05	1.26488e-05	1.27173e-05
661	5.96423e-05	2.40781e-05	1.12291e-05	1.23546e-05
662	5.92426e-05	2.53343e-05	9.12665e-06	8.21319e-06
663	8.36211e-05	3.2163e-05	1.5447e-05	1.28545e-05
664	8.29193e-05	3.69196e-05	1.31894e-05	1.35185e-05
665	0.000134305	5.64758e-05	2.49969e-05	2.77505e-05
666	0.000132439	5.41814e-05	2.59677e-05	2.80449e-05
667	0.000131535	5.54178e-05	2.50668e-05	2.87028e-05
668	9.65463e-05	3.84165e-05	1.52141e-05	1.37869e-05
669	0.000149438	5.70761e-05	2.79455e-05	2.77686e-05
670	0.000153112	5.82929e-05	2.92677e-05	2.84032e-05
671	0.000149511	5.94691e-05	2.87675e-05	2.79583e-05
672	6.13433e-05	1.96328e-05	1.17348e-05	1.02634e-05
673	8.36832e-05	2.7165e-05	1.59216e-05	1.36953e-05
674	5.46279e-05	2.0461e-05	1.18511e-05	1.05468e-05
675	5.26218e-05	2.14664e-05	1.28017e-05	1.14323e-05
676	6.29868e-05	2.56762e-05	1.41873e-05	1.21012e-05
677	7.71624e-05	3.05452e-05	1.67791e-05	1.47088e-05
678	6.68999e-05	3.30941e-05	1.5962e-05	1.34707e-05
679	9.48044e-05	4.7861e-05	2.57894e-05	2.16202e-05
680	8.08103e-05	4.09656e-05	2.2126e-05	1.79992e-05
681	8.55309e-05	4.56428e-05	2.12561e-05	1.90998e-05
682	0.000122816	5.99679e-05	3.41592e-05	3.18112e-05
683	0.000110966	6.15815e-05	2.95343e-05	2.67549e-05
684	0.000162921	8.9328e-05	4.91127e-05	4.91669e-05
685	0.000169693	8.8503e-05	4.94153e-05	4.8125e-05
686	0.000164373	8.83229e-05	4.9694e-05	4.99088e-05
687	0.000134011	6.58632e-05	3.18306e-05	2.82499e-05
688	0.000191009	9.50976e-05	5.39187e-05	5.10529e-05
689	0.000202651	9.53031e-05	5.29247e-05	5.30878e-05
690	0.000198023	9.73123e-05	5.28866e-05	5.21234e-05
691	6.58061e-05	2.67461e-05	1.56059e-05	1.36508e-05
692	6.76755e-05	2.82782e-05	1.73617e-05	1.5433e-05
693	7.99073e-05	3.24498e-05	1.86111e-05	1.67782e-05
694	0.000102533	4.22192e-05	2.34187e-05	2.14231e-05
695	0.000119276	4.62048e-05	2.69998e-05	2.40219e-05
696	0.00010916	4.88183e-05	2.64184e-05	2.54105e-05
697	9.14827e-05	3.8574e-05	2.18728e-05	2.03872e-05
698	0.000100149	4.18349e-05	2.42365e-05	2.24076e-05
699	0.000119316	5.12981e-05	2.74363e-05	2.68056e-05
700	0.000155347	6.49216e-05	3.73779e-05	3.80678e-05
701	0.000142763	6.10237e-05	3.39923e-05	3.34876e-05
702	0.000133951	5.70081e-05	3.12723e-05	3.05081e-05
703	0.000177948	7.13451e-05	4.24764e-05	4.25232e-05
704	0.000171403	7.68406e-05	4.1427e-05	4.32284e-05
705	9.58621e-05	4.1457e-05	2.43798e-05	2.40721e-05
706	0.000100665	4.53166e-05	2.66209e-05	2.69109e-05
707	0.000116398	5.10838e-05	3.01407e-05	3.06134e-05
708	0.000151467	6.27597e-05	3.6661e-05	3.70973e-05
709	0.000154616	6.26945e-05	3.74614e-05	3.68e-05
710	0.000168244	7.00255e-05	4.08783e-05	4.12292e-05
711	0.000141105	6.29891e-05	3.85455e-05	4.09519e-05
712	0.000145701	6.6503e-05	4.18733e-05	4.36533e-05
713	0.000191302	8.32491e-05	5.03329e-05	5.3871e-05
714	0.00024457	0.000107828	7.06561e-05	7.39707e-05
715	0.000220973	9.45147e-05	5.73259e-05	6.20425e-05
716	0.000209828	8.57986e-05	5.22691e-05	5.31806e-05
717	0.000261191	0.000103086	6.76946e-05	6.85573e-05
718	0.00026627	0.000108443	6.74837e-05	6.80433e-05
719	0.000166099	6.78997e-05	4.03143e-05	4.65085e-05
720	0.00018154	6.9078e-05	4.07855e-05	4.83907e-05
721	0.000206862	8.44798e-05	5.00947e-05	5.93662e-05
722	0.000224896	9.46316e-05	5.80177e-05	6.52785e-05
723	0.00026887	0.000103806	5.90392e-05	7.57181e-05
724	0.000296013	0.000109782	6.26194e-05	8.13755e-05
725	0.000345382	0.000139336	8.00195e-05	0.000101697
726	0.00043762	0.000184255	0.000110186	0.000138101
727	0.000424884	0.000181453	0.00010946	0.000138498
728	0.000442262	0.00018179	0.000111535	0.000136864
729	0.000291531	0.000111647	6.34359e-05	8.73301e-05
730	0.000368541	0.000137939	7.83847e-05	0.000116911
731	0.000288334	0.00011202	6.64383e-05	9.11197e-05
732	0.000295664	0.000116906	7.3553e-05	9.42939e-05
733	0.000337473	0.000130061	7.80137e-05	0.00011482
734	0.000406518	0.00014963	9.06792e-05	0.000137342
735	0.00044846	0.000172246	0.000109626	0.000158019
736	0.000559055	0.000207448	0.000138201	0.000202824
737	0.000500849	0.000191844	0.000124056	0.000183824
738	0.000611554	0.000228549	0.000151527	0.000207157
739	0.000747575	0.0002882	0.000197918	0.000261312
740	0.000715437	0.000269193	0.000190268	0.000260704
741	0.000811223	0.000301761	0.000212706	0.000282573
742	0.00095993	0.000355845	0.000255289	0.000332402
743	0.000968178	0.000370441	0.000261696	0.000354169
744	0.00109658	0.000414142	0.000308426	0.000409054
745	0.00129037	0.00048628	0.00036763	0.000506513
746	0.00126301	0.000493436	0.000370825	0.000498622
747	0.00138777	0.000530105	0.000406253	0.000522779
748	0.00161877	0.000613038	0.000480242	0.000619121
749	0.0015656	0.00062468	0.000480004	0.000623171
750	0.0015961	0.000622223	0.00047864	0.000626511
751	0.000318384	0.000121829	7.20782e-05	0.000114379
752	0.000382973	0.000149633	0.000100677	0.00014701
753	0.000369876	0.000127146	7.94166e-05	0.000139082
754	0.000450186	0.000152969	9.9066e-05	0.000170074
755	0.000424229	0.000137837	9.48854e-05	0.00016391
756	0.000439108	0.000148962	0.000107444	0.000180723
757	0.000605242	0.000177602	0.000141979	0.000229102
758	0.000743241	0.000215854	0.000176623	0.000278169
759	0.000723407	0.000213089	0.000169832	0.000272201
760	0.000749247	0.000224676	0.000189057	0.000281757
761	0.000847062	0.000257422	0.000220587	0.000325715
762	0.000415381	0.00013054	8.46293e-05	0.000154301
763	0.000545594	0.00016243	0.000107061	0.000179142
764	0.000373938	0.000120903	7.67649e-05	0.000152522
765	0.000396684	0.000135598	9.19628e-05	0.000174938
766	0.000430802	0.000119346	7.43048e-05	0.000156583
767	0.000506776	0.00013993	8.56526e-05	0.000188079
768	0.000552899	0.000139486	9.43738e-05	0.000208385
769	0.000634778	0.000169123	0.000127575	0.000245398
770	0.000663107	0.000175015	0.000123135	0.000263637
771	0.000737984	0.000186628	0.000132582	0.000275711
772	0.000836589	0.000225997	0.000159728	0.000324796
773	0.000396782	0.00010095	6.42521e-05	0.000137364
774	0.0004031	8.88657e-05	5.87361e-05	0.000149663
775	0.000430009	0.000110726	7.0281e-05	0.00015503
776	0.000472327	0.000128629	7.99353e-05	0.000181702
777	0.000461288	0.000109362	7.34712e-05	0.000178718
778	0.000484577	0.00011635	8.24428e-05	0.000192494
779	0.000596417	0.000141724	9.71136e-05	0.000254452
780	0.000727372	0.000179894	0.000131062	0.000294828
781	0.000704942	0.000184075	0.000129601	0.000302689
782	0.00077273	0.000197681	0.000142554	0.000341209
783	0.000877862	0.000237085	0.000173569	0.000396027
784	0.00041425	9.50132e-05	6.38076e-05	0.000160684
785	0.000436155	9.05065e-05	6.51111e-05	0.000178961
786	0.000404294	0.000101307	6.49743e-05	0.000150576
787	0.000436864	0.000115007	7.2111e-05	0.000163236
788	0.000414856	0.000101126	6.64319e-05	0.000156002
789	0.000472068	0.00010575	7.01365e-05	0.000180439
790	0.000517089	0.000129055	8.44191e-05	0.000208637
791	0.000600769	0.000158765	0.000104529	0.000237259
792	0.000592666	0.000155487	0.000105316	0.000241119
793	0.000726343	0.000186785	0.00012715	0.000300058
794	0.00082723	0.000232092	0.000162547	0.00034241
795	0.000963295	0.000258666	0.000181602	0.000403166
796	0.00117317	0.000323192	0.000234625	0.000484047
797	0.00115699	0.000325368	0.000232659	0.000494218
798	0.00115375	0.000326651	0.000242007	0.00049568
799	0.000931161	0.000246628	0.000170099	0.000390289
800	0.00112054	0.000315223	0.000225886	0.000483406
801	0.00113725	0.000317897	0.000224319	0.000480139
802	0.00114082	0.000315464	0.000227743	0.000485046
803	0.000334334	8.63334e-05	5.79502e-05	0.000125062
804	0.000354381	8.40693e-05	5.74886e-05	0.000133689
805	0.000289012	8.33829e-05	5.51143e-05	0.000110361
806	0.000310315	9.08333e-05	5.8806e-05	0.000127007
807	0.000256031	7.72175e-05	5.17233e-05	9.44259e-05
808	0.000287388	8.46246e-05	5.68838e-05	0.000106014
809	0.000295932	9.07774e-05	6.15873e-05	0.000121132
810	0.000337725	9.90138e-05	6.99214e-05	0.000141308
811	0.000309869	0.000105065	7.38608e-05	0.000161494
812	0.000405292	0.000137508	0.000102515	0.00020733
813	0.000394573	0.00013752	0.000102293	0.000209351
814	0.000390859	0.000141523	0.000102049	0.000207446
815	0.000421181	0.000128956	9.19151e-05	0.000178813
816	0.00052303	0.000166965	0.000121506	0.00021793
817	0.000511379	0.000159409	0.00011978	0.000221159
818	0.000568172	0.000177234	0.00012973	0.000247266
819	0.000695469	0.00022787	0.000172371	0.000310776
820	0.000710216	0.000229973	0.000172909	0.000310033
821	0.000701955	0.000227285	0.000171362	0.000322681
822	0.000195042	6.02471e-05	4.05554e-05	6.99217e-05
823	0.000185668	5.5533e-05	3.75845e-05	7.6209e-05
824	0.000188942	5.86431e-05	3.926e-05	6.53723e-05
825	0.000220059	6.61476e-05	4.43376e-05	7.96255e-05
826	0.000180861	5.33004e-05	3.68078e-05	6.55294e-05
827	0.000177007	5.12483e-05	3.58354e-05	6.93363e-05
828	0.000243411	6.54961e-05	4.64111e-05	9.31289e-05
829	0.000292803	8.60862e-05	6.32158e-05	0.00011278
830	0.000293695	8.41394e-05	6.03813e-05	0.00011116
831	0.000305011	7.99746e-05	6.04825e-05	0.000116575
832	0.000384061	0.000109235	8.69227e-05	0.000157338
833	0.00037784	0.000102172	7.917e-05	0.000139646
834	0.000411953	0.000110229	8.5112e-05	0.000143237
835	0.000497131	0.000139665	0.000109274	0.000172184
836	0.000513718	0.00014511	0.000119429	0.000188792
837	0.000532514	0.000153708	0.000114237	0.000202489
838	0.000588175	0.000184256	0.000136523	0.000246118
839	0.000734345	0.000217688	0.000165863	0.000288616
840	0.000877289	0.000258171	0.000208239	0.0004106
841	0.000832805	0.000242736	0.000199928	0.000436796
842	0.00113637	0.000345049	0.000280976	0.000525688
843	0.000967711	0.000306503	0.000232597	0.000346926
844	0.00100865	0.000331512	0.000248968	0.0003194
845	0.00121113	0.000389313	0.000301938	0.000467543
846	0.000164535	4.99691e-05	3.50216e-05	5.61055e-05
847	0.00017201	4.71473e-05	3.42553e-05	5.7798e-05
848	0.000168316	5.59892e-05	3.79791e-05	5.3221e-05
849	0.000190312	6.28315e-05	4.16971e-05	5.80072e-05
850	0.000174017	5.83354e-05	4.02018e-05	5.33446e-05
851	0.000195209	6.23942e-05	4.3874e-05	5.81888e-05
852	0.000225666	7.33602e-05	5.00645e-05	6.62433e-05
853	0.000271139	8.79919e-05	6.06289e-05	7.93977e-05
854	0.000265243	8.97558e-05	6.13496e-05	8.10415e-05
855	0.000337776	0.000110963	7.55256e-05	0.000102811
856	0.000408901	0.000140756	9.85744e-05	0.000135493
857	0.00046007	0.000161011	0.000113588	0.000148096
858	0.000585167	0.000211728	0.000154636	0.000199575
859	0.000582753	0.000213005	0.000155992	0.000204997
860	0.000569239	0.000210958	0.000154021	0.000201873
861	0.000457097	0.000148942	0.000107399	0.000138094
862	0.000582659	0.000202045	0.000145612	0.00019375
863	0.000575759	0.00019997	0.000151318	0.000197794
864	0.000596769	0.000198515	0.000150704	0.000193808
865	0.000142857	5.07481e-05	3.53835e-05	4.45124e-05
866	0.000150799	5.01922e-05	3.57958e-05	4.48778e-05
867	0.000131429	5.11565e-05	3.52738e-05	4.29321e-05
868	0.00014632	5.63658e-05	3.86389e-05	4.79055e-05
869	0.000123439	5.10155e-05	3.48946e-05	4.06134e-05
870	0.000143664	5.58868e-05	3.77939e-05	4.22992e-05
871	0.000152631	6.3724e-05	4.3843e-05	5.20272e-05
872	0.000223157	9.34017e-05	6.65081e-05	7.93939e-05
873	0.000214087	9.24932e-05	6.76772e-05	8.01524e-05
874	0.000232788	9.38279e-05	6.61898e-05	8.21099e-05
875	9.52325e-05	4.06602e-05	2.84219e-05	3.37775e-05
876	9.30052e-05	3.98308e-05	2.76875e-05	3.26674e-05
877	8.42408e-05	3.64263e-05	2.61414e-05	3.2984e-05
878	9.30543e-05	4.00317e-05	2.86995e-05	3.70335e-05
879	7.00749e-05	3.0524e-05	2.30421e-05	2.90252e-05
880	7.00048e-05	3.1812e-05	2.40223e-05	2.99753e-05
881	7.75216e-05	3.4306e-05	2.62421e-05	3.32528e-05
882	0.000104133	4.2778e-05	3.37532e-05	3.99749e-05
883	9.34554e-05	4.30435e-05	3.18522e-05	4.13368e-05
884	7.77329e-05	3.4717e-05	2.6768e-05	3.24252e-05
885	0.000133148	5.6275e-05	4.42883e-05	4.97556e-05
886	0.000186552	7.93974e-05	6.28211e-05	7.15392e-05
887	0.000180562	7.42551e-05	5.85318e-05	6.11633e-05
888	0.000280083	0.000114914	9.09458e-05	9.16773e-05
889	0.000169477	6.87519e-05	5.46261e-05	5.78246e-05
890	0.000266326	0.000102693	8.24519e-05	8.49214e-05
891	0.000314392	0.00011955	9.96689e-05	9.90425e-05
892	0.00012655	5.81191e-05	4.48327e-05	5.62011e-05
893	0.000178792	8.24636e-05	6.56314e-05	8.55172e-05
894	0.000171834	7.40602e-05	5.88808e-05	6.98144e-05
895	0.000264243	0.00011412	9.15015e-05	0.000111892
896	6.88178e-05	2.70391e-05	2.09879e-05	2.50199e-05
897	6.63965e-05	2.47988e-05	2.03483e-05	2.31117e-05
898	8.04896e-05	3.07918e-05	2.37026e-05	2.739e-05
899	8.72147e-05	3.50531e-05	2.60591e-05	3.08662e-05
900	9.36344e-05	3.4128e-05	2.68196e-05	2.84516e-05
901	0.000101492	3.6524e-05	2.89869e-05	2.95708e-05
902	0.000121693	4.64314e-05	3.53426e-05	3.68402e-05
903	0.000162268	6.34783e-05	4.87471e-05	5.25297e-05
904	0.000152808	6.20235e-05	4.93864e-05	5.17531e-05
905	0.000177559	7.30488e-05	5.57399e-05	5.88108e-05
906	0.000261609	0.000107201	8.28856e-05	8.92501e-05
907	0.00025796	0.00010537	8.21556e-05	8.65827e-05
908	0.000287999	0.000119187	9.20095e-05	0.000100954
909	0.000389765	0.000159671	0.000122935	0.000141939
910	0.000370134	0.000159502	0.000121912	0.000134872
911	0.000408336	0.00017019	0.000134069	0.000148503
912	0.000528799	0.000224275	0.000176687	0.000206405
913	0.000519616	0.00022029	0.000175119	0.000195293
914	0.000570396	0.000237159	0.000183125	0.000209308
915	0.000692583	0.000295607	0.000228094	0.000273536
916	0.000693003	0.00030008	0.000231111	0.000270069
917	0.000706068	0.000293294	0.000232151	0.000274059
918	8.89086e-05	3.12401e-05	2.50415e-05	2.50912e-05
919	0.000101018	3.51321e-05	2.85169e-05	2.57187e-05
920	8.78169e-05	3.07481e-05	2.39957e-05	2.4786e-05
921	9.35201e-05	3.3763e-05	2.56072e-05	2.70033e-05
922	9.49097e-05	3.27718e-05	2.4485e-05	2.34397e-05
923	0.000106158	3.83246e-05	2.81184e-05	2.60074e-05
924	0.000119242	4.12353e-05	2.95617e-05	2.7894e-05
925	0.000151996	5.77689e-05	3.95077e-05	3.57099e-05
926	0.000174302	5.79334e-05	4.6718e-05	3.57824e-05
927	0.000263015	9.04437e-05	7.58503e-05	6.56832e-05
928	0.000249719	9.25761e-05	7.63356e-05	6.46081e-05
929	0.000256538	9.27625e-05	7.51207e-05	6.09743e-05
930	0.000155668	6.32163e-05	4.5929e-05	4.26693e-05
931	0.000229683	9.67621e-05	7.10154e-05	7.26306e-05
932	0.000229437	9.6089e-05	7.29139e-05	7.05292e-05
933	0.000229861	9.68463e-05	7.13441e-05	6.89654e-05
934	8.09883e-05	2.79282e-05	2.08519e-05	1.96232e-05
935	8.54865e-05	2.97643e-05	2.19545e-05	1.89513e-05
936	7.13901e-05	2.49093e-05	1.96183e-05	1.95889e-05
937	7.41117e-05	2.68807e-05	2.15382e-05	2.19677e-05
938	6.49541e-05	2.25206e-05	1.85429e-05	1.77232e-05
939	7.32411e-05	2.56494e-05	2.09485e-05	1.86378e-05
940	7.3524e-05	2.58662e-05	2.20744e-05	2.1527e-05
941	8.79359e-05	3.04105e-05	2.57408e-05	2.50074e-05
942	9.32981e-05	3.12426e-05	2.75537e-05	2.66879e-05
943	7.80942e-05	2.85925e-05	2.35892e-05	2.17539e-05
944	0.00012268	4.6431e-05	3.92786e-05	3.3584e-05
945	0.000163704	6.57552e-05	5.60866e-05	4.98689e-05
946	0.000166884	5.84381e-05	5.10514e-05	4.08745e-05
947	0.000251179	9.0441e-05	7.83682e-05	6.51774e-05
948	0.000158318	5.22998e-05	4.52893e-05	3.41445e-05
949	0.000210164	6.87353e-05	6.04072e-05	4.3604e-05
950	0.000125176	4.65535e-05	3.73854e-05	3.16385e-05
951	0.000166077	6.59716e-05	5.31118e-05	4.67721e-05
952	0.000171085	6.00154e-05	4.92565e-05	3.72407e-05
953	0.000256567	9.22295e-05	7.57473e-05	5.71506e-05
954	5.2777e-05	1.81754e-05	1.49504e-05	1.45642e-05
955	5.27568e-05	1.73965e-05	1.46643e-05	1.35509e-05
956	5.09373e-05	1.79105e-05	1.45395e-05	1.50838e-05
957	5.7173e-05	2.02644e-05	1.64037e-05	1.76351e-05
958	4.79768e-05	1.69449e-05	1.39317e-05	1.43229e-05
959	4.6396e-05	1.67546e-05	1.37133e-05	1.4074e-05
960	5.92399e-05	2.17087e-05	1.75711e-05	1.83917e-05
961	9.02528e-05	3.32368e-05	2.78667e-05	3.05391e-05
962	8.97132e-05	3.49914e-05	2.90698e-05	3.162e-05
963	0.00014233	5.8402e-05	4.85365e-05	5.48661e-05
964	0.000147827	5.8389e-05	4.95958e-05	5.74766e-05
965	0.000144916	5.78708e-05	4.8328e-05	5.51562e-05
966	8.69373e-05	3.50927e-05	2.74914e-05	2.74536e-05
967	0.0001467	5.73195e-05	4.76115e-05	5.08182e-05
968	0.000140126	5.64232e-05	4.79678e-05	5.05604e-05
969	0.000140477	5.91352e-05	4.65149e-05	4.96658e-05
970	4.62887e-05	1.61758e-05	1.3404e-05	1.32505e-05
971	4.58237e-05	1.66797e-05	1.37383e-05	1.25042e-05
972	4.99148e-05	1.75257e-05	1.41065e-05	1.4642e-05
973	5.44152e-05	1.92949e-05	1.52745e-05	1.60347e-05
974	5.08928e-05	1.80588e-05	1.4662e-05	1.45846e-05
975	5.62351e-05	2.01862e-05	1.65529e-05	1.60605e-05
976	6.05446e-05	2.2275e-05	1.76833e-05	1.81122e-05
977	6.83257e-05	2.52153e-05	2.11777e-05	2.30122e-05
978	7.9197e-05	3.13917e-05	2.3454e-05	2.33937e-05
979	0.000132331	5.40727e-05	4.0725e-05	4.16513e-05
980	0.000134053	5.34552e-05	4.20744e-05	4.29691e-05
981	0.000137289	5.33777e-05	4.13476e-05	4.35359e-05
982	8.82606e-05	3.38109e-05	2.67476e-05	2.70748e-05
983	0.000141783	5.69173e-05	4.58443e-05	4.83814e-05
984	0.000147507	5.69264e-05	4.45057e-05	4.78575e-05
985	0.000144363	5.5978e-05	4.53133e-05	4.76387e-05
986	4.2971e-05	1.54558e-05	1.25617e-05	1.2065e-05
987	4.39813e-05	1.63394e-05	1.32979e-05	1.23459e-05
988	4.0536e-05	1.4468e-05	1.18274e-05	1.18479e-05
989	4.52891e-05	1.61086e-05	1.32568e-05	1.34216e-05
990	3.73483e-05	1.3563e-05	1.158e-05	1.11608e-05
991	3.99402e-05	1.46874e-05	1.25579e-05	1.20746e-05
992	4.468e-05	1.64738e-05	1.41937e-05	1.36634e-05
993	5.68378e-05	2.09387e-05	1.77197e-05	1.66577e-05
994	5.48221e-05	2.15191e-05	1.82036e-05	1.64534e-05
995	5.72297e-05	2.02521e-05	1.87126e-05	1.63273e-05
996	0.000103964	3.66158e-05	3.53052e-05	3.08314e-05
997	0.000141876	5.41434e-05	5.02204e-05	4.73972e-05
998	0.000151011	5.29148e-05	5.19746e-05	4.11097e-05
999	0.00023654	8.47709e-05	8.53116e-05	6.72681e-05
1000	0.000142676	5.03279e-05	4.81378e-05	3.44428e-05
1001	0.00019678	7.04538e-05	6.87265e-05	4.65546e-05
1002	0.000103648	3.7176e-05	3.50301e-05	2.72153e-05
1003	0.000145353	5.38216e-05	4.925e-05	4.08064e-05
1004	0.000148742	5.34691e-05	5.11872e-05	3.65115e-05
1005	0.000235133	8.61221e-05	8.33304e-05	5.87811e-05
1006	3.21371e-05	1.1403e-05	1.00889e-05	9.53513e-06
1007	3.18039e-05	1.13335e-05	1.03541e-05	9.79468e-06
1008	3.04233e-05	1.05643e-05	9.61712e-06	8.744e-06
1009	3.33123e-05	1.16844e-05	1.04608e-05	9.71731e-06
1010	2.71358e-05	9.24175e-06	8.88344e-06	7.88871e-06
1011	2.84376e-05	1.00278e-05	9.71635e-06	8.98109e-06
1012	2.92893e-05	1.02458e-05	9.86365e-06	8.90403e-06
1013	4.13065e-05	1.68077e-05	1.61154e-05	1.48826e-05
1014	4.55316e-05	1.83129e-05	1.75467e-05	1.77302e-05
1015	7.89866e-05	3.38424e-05	3.24444e-05	3.50314e-05
1016	8.34205e-05	3.43823e-05	3.22828e-05	3.53011e-05
1017	8.33409e-05	3.41766e-05	3.21922e-05	3.49859e-05
1018	4.74361e-05	1.80705e-05	1.77258e-05	1.6402e-05
1019	8.0771e-05	3.18614e-05	3.03067e-05	3.26196e-05
1020	8.164e-05	3.12228e-05	3.00435e-05	2.98284e-05
1021	7.1506e-05	2.95599e-05	2.7743e-05	2.95188e-05
1022	0.000119933	5.1454e-05	4.7762e-05	5.25554e-05
1023	0.000121586	5.12274e-05	4.75972e-05	5.58748e-05
1024	0.00012237	5.0153e-05	4.82023e-05	5.38608e-05
1025	2.58107e-05	8.13838e-06	8.0615e-06	6.93532e-06
1026	2.47743e-05	7.67706e-06	7.87811e-06	6.79802e-06
1027	2.95157e-05	9.15901e-06	8.71062e-06	7.74933e-06
1028	3.24492e-05	1.06841e-05	9.72249e-06	9.17842e-06
1029	3.27639e-05	9.5471e-06	9.25749e-06	8.2772e-06
1030	3.28092e-05	9.5556e-06	9.43456e-06	8.29322e-06
1031	4.26363e-05	1.2488e-05	1.16192e-05	1.08825e-05
1032	5.71659e-05	1.72809e-05	1.57997e-05	1.52412e-05
1033	5.84165e-05	1.67155e-05	1.52578e-05	1.42999e-05
1034	9.55277e-05	3.00102e-05	2.53613e-05	2.48256e-05
1035	5.99221e-05	1.7443e-05	1.56446e-05	1.40233e-05
1036	0.000121343	3.86469e-05	3.27355e-05	3.12766e-05
1037	0.000185447	6.18884e-05	5.06374e-05	5.17604e-05
1038	0.000127297	3.98387e-05	3.32401e-05	3.22919e-05
1039	0.000189444	6.04903e-05	5.06763e-05	5.04395e-05
1040	0.000110151	3.29746e-05	2.74516e-05	2.69448e-05
1041	0.000170289	5.21882e-05	4.37571e-05	4.5011e-05
1042	3.21769e-05	9.04013e-06	8.8129e-06	8.23635e-06
1043	3.38942e-05	9.64593e-06	9.31397e-06	9.04823e-06
1044	3.25492e-05	9.31547e-06	8.98043e-06	8.41941e-06
1045	3.46026e-05	1.02932e-05	9.74168e-06	9.30309e-06
1046	3.3461e-05	9.4071e-06	9.17996e-06	8.78592e-06
1047	3.79396e-05	1.07247e-05	1.04387e-05	1.00952e-05
1048	3.85924e-05	1.1388e-05	1.07794e-05	1.06327e-05
1049	4.86873e-05	1.60363e-05	1.51791e-05	1.57848e-05
1050	5.51631e-05	1.65831e-05	1.58014e-05	1.70276e-05
1051	9.96769e-05	3.33331e-05	3.14081e-05	3.61244e-05
1052	0.000100666	3.24441e-05	3.03122e-05	3.44163e-05
1053	0.000100408	3.31605e-05	3.1255e-05	3.50331e-05
1054	5.9943e-05	1.96772e-05	1.75136e-05	1.74497e-05
1055	0.000104393	3.64938e-05	3.28146e-05	3.45409e-05
1056	9.49913e-05	3.21821e-05	2.97395e-05	3.12473e-05
1057	0.000104833	3.66089e-05	3.18264e-05	3.42033e-05
1058	0.000169373	6.15457e-05	5.46482e-05	6.38356e-05
1059	0.000172561	6.27675e-05	5.62508e-05	6.34379e-05
1060	0.000174102	6.36956e-05	5.49343e-05	6.43305e-05
1061	2.90968e-05	8.07996e-06	8.25609e-06	7.74662e-06
1062	3.02488e-05	8.44697e-06	8.70399e-06	8.62316e-06
1063	2.73377e-05	7.58472e-06	7.94597e-06	7.19012e-06
1064	2.93641e-05	8.55638e-06	8.65062e-06	7.76017e-06
1065	2.53728e-05	7.01757e-06	7.61364e-06	6.88144e-06
1066	2.76367e-05	7.60551e-06	8.44969e-06	7.97956e-06
1067	2.8112e-05	8.27074e-06	8.7454e-06	8.17736e-06
1068	4.07313e-05	1.3153e-05	1.30447e-05	1.2736e-05
1069	4.53413e-05	1.41645e-05	1.42978e-05	1.32657e-05
1070	3.92562e-05	1.39922e-05	1.38644e-05	1.386e-05
1071	6.59846e-05	2.44053e-05	2.39268e-05	2.46947e-05
1072	6.30829e-05	2.2125e-05	2.19923e-05	2.11481e-05
1073	0.000109015	4.00759e-05	3.966e-05	4.20519e-05
1074	0.000107278	3.98866e-05	3.87744e-05	4.12214e-05
1075	0.000108727	4.03998e-05	3.91772e-05	4.15031e-05
1076	6.39868e-05	2.2697e-05	2.17566e-05	2.27813e-05
1077	0.000111452	3.96847e-05	3.85134e-05	4.46668e-05
1078	0.000110846	4.08878e-05	3.92704e-05	4.33667e-05
1079	0.000110141	4.03429e-05	3.80546e-05	4.26234e-05
1080	2.21713e-05	5.96673e-06	6.68016e-06	5.85004e-06
1081	2.26774e-05	6.02922e-06	6.99182e-06	6.1486e-06
1082	2.0926e-05	5.77867e-06	6.26142e-06	5.369e-06
1083	2.27302e-05	6.51458e-06	6.79192e-06	5.89956e-06
1084	1.90016e-05	5.36461e-06	5.77721e-06	4.97103e-06
1085	1.85703e-05	5.20541e-06	5.75791e-06	5.04746e-06
1086	2.03127e-05	6.32527e-06	6.29889e-06	5.47737e-06
1087	2.64953e-05	9.26386e-06	8.71428e-06	7.65979e-06
1088	2.73553e-05	8.98046e-06	8.09935e-06	7.32371e-06
1089	1.59268e-05	5.06713e-06	5.5825e-06	4.53414e-06
1090	3.12957e-05	1.05603e-05	1.03453e-05	8.93119e-06
1091	5.89575e-05	1.97767e-05	1.79798e-05	1.67291e-05
1092	3.73886e-05	1.32595e-05	1.2922e-05	1.14135e-05
1093	7.12327e-05	2.55881e-05	2.37988e-05	2.22672e-05
1094	2.64925e-05	9.89845e-06	9.37153e-06	8.15639e-06
1095	3.75492e-05	1.4734e-05	1.33682e-05	1.1805e-05
1096	3.09689e-05	1.00044e-05	9.64088e-06	9.12156e-06
1097	5.92712e-05	1.83114e-05	1.69286e-05	1.71122e-05
1098	3.78422e-05	1.32745e-05	1.19478e-05	1.13282e-05
1099	7.37315e-05	2.56642e-05	2.18718e-05	2.19934e-05
1100	2.00058e-05	5.63005e-06	6.18095e-06	5.42212e-06
1101	1.98554e-05	5.70497e-06	6.4054e-06	5.59474e-06
1102	2.32423e-05	6.56505e-06	7.07812e-06	6.30986e-06
1103	2.55332e-05	7.19765e-06	7.66568e-06	6.8796e-06
1104	2.67968e-05	7.40611e-06	8.17911e-06	7.41407e-06
1105	2.817e-05	8.16924e-06	8.89872e-06	8.22276e-06
1106	3.39796e-05	9.49577e-06	1.01319e-05	9.38704e-06
1107	4.41573e-05	1.31929e-05	1.39697e-05	1.29603e-05
1108	5.14694e-05	1.53378e-05	1.53348e-05	1.34689e-05
1109	8.90125e-05	2.98762e-05	2.94217e-05	2.81708e-05
1110	9.16884e-05	3.03368e-05	2.9054e-05	2.78271e-05
1111	8.98316e-05	2.99902e-05	2.91762e-05	2.74693e-05
1112	4.78399e-05	1.48786e-05	1.48136e-05	1.39951e-05
1113	8.45013e-05	2.87787e-05	2.77466e-05	2.85085e-05
1114	8.57197e-05	2.91139e-05	2.81748e-05	2.82277e-05
1115	8.9016e-05	2.83143e-05	2.85711e-05	2.94388e-05
1116	2.63108e-05	7.02942e-06	8.08084e-06	7.18809e-06
1117	2.81045e-05	7.69273e-06	8.89474e-06	7.82952e-06
1118	2.5956e-05	6.78914e-06	7.9088e-06	7.06054e-06
1119	2.70964e-05	7.17077e-06	8.27411e-06	7.44453e-06
1120	2.68324e-05	6.98628e-06	8.23756e-06	7.32418e-06
1121	3.0499e-05	8.26572e-06	9.53668e-06	8.62133e-06
1122	3.04544e-05	8.16948e-06	9.63508e-06	8.71243e-06
1123	4.80518e-05	1.32284e-05	1.5924e-05	1.25896e-05
1124	4.21633e-05	1.22497e-05	1.40956e-05	1.11667e-05
1125	4.47868e-05	1.29697e-05	1.46191e-05	1.18806e-05
1126	6.97059e-05	2.11567e-05	2.4835e-05	1.7147e-05
1127	7.06389e-05	2.19323e-05	2.43998e-05	1.73517e-05
1128	0.000126339	4.00166e-05	4.43423e-05	3.49886e-05
1129	0.000121856	4.07253e-05	4.51494e-05	3.50148e-05
1130	0.00011864	4.04044e-05	4.45391e-05	3.39622e-05
1131	7.55397e-05	2.25137e-05	2.65501e-05	1.79701e-05
1132	0.000131232	4.20196e-05	4.77963e-05	3.6792e-05
1133	0.000127287	4.19083e-05	4.77944e-05	3.61857e-05
1134	0.000129796	4.24819e-05	4.76604e-05	3.59915e-05
1135	2.39441e-05	6.13504e-06	7.37708e-06	6.44585e-06
1136	2.63473e-05	6.90055e-06	8.27744e-06	7.19261e-06
1137	2.08374e-05	5.3225e-06	6.42707e-06	5.60578e-06
1138	2.15269e-05	5.63388e-06	6.63758e-06	5.75395e-06
1139	1.89234e-05	4.87283e-06	5.86557e-06	5.15659e-06
1140	2.13118e-05	5.356e-06	6.51982e-06	5.73728e-06
1141	1.86744e-05	4.69138e-06	5.47887e-06	4.75409e-06
1142	2.41092e-05	6.95971e-06	7.34397e-06	6.69686e-06
1143	2.60711e-05	7.40291e-06	8.05097e-06	7.29051e-06
1144	3.18773e-05	9.9958e-06	1.0244e-05	1.01109e-05
1145	2.15773e-05	6.0521e-06	7.16672e-06	7.5482e-06
1146	4.3315e-05	1.36636e-05	1.56222e-05	1.64625e-05
1147	4.1323e-05	1.3746e-05	1.55898e-05	1.77067e-05
1148	4.33403e-05	1.36114e-05	1.53799e-05	1.73138e-05
1149	1.86855e-05	5.14117e-06	6.04861e-06	5.29867e-06
1150	2.05716e-05	5.77999e-06	6.74906e-06	6.19152e-06
1151	1.91046e-05	5.42974e-06	6.24869e-06	5.46814e-06
1152	1.98363e-05	5.70264e-06	6.59585e-06	5.80868e-06
1153	2.02141e-05	6.14686e-06	6.964e-06	6.27429e-06
1154	1.99672e-05	6.29337e-06	7.02245e-06	6.61387e-06
1155	2.29826e-05	7.12528e-06	7.95072e-06	7.5392e-06
1156	3.72104e-05	1.1361e-05	1.30042e-05	1.39934e-05
1157	3.42965e-05	1.0527e-05	1.19636e-05	1.22514e-05
1158	3.04725e-05	9.68062e-06	1.08652e-05	1.06945e-05
1159	5.52342e-05	1.87163e-05	2.03556e-05	2.20347e-05
1160	4.83841e-05	1.5786e-05	1.64582e-05	1.85513e-05
1161	8.60933e-05	3.06295e-05	3.13788e-05	3.87004e-05
1162	8.70645e-05	3.04447e-05	3.091e-05	3.72947e-05
1163	8.75023e-05	3.07873e-05	3.09786e-05	3.79114e-05
1164	5.18989e-05	1.82001e-05	1.91933e-05	2.03169e-05
1165	8.97375e-05	3.43676e-05	3.51864e-05	4.04937e-05
1166	9.23198e-05	3.40579e-05	3.58624e-05	4.04204e-05
1167	9.09989e-05	3.38475e-05	3.48154e-05	4.06182e-05
1168	2.29197e-05	7.1628e-06	8.06772e-06	7.25933e-06
1169	2.51229e-05	8.19897e-06	9.07816e-06	8.44506e-06
1170	2.51485e-05	7.71398e-06	8.70246e-06	7.66463e-06
1171	2.57715e-05	7.74006e-06	8.72155e-06	7.6537e-06
1172	2.90486e-05	9.10993e-06	1.02181e-05	9.00786e-06
1173	3.23908e-05	1.06384e-05	1.1762e-05	1.04687e-05
1174	3.4268e-05	1.05902e-05	1.18599e-05	1.05524e-05
1175	5.186e-05	1.35109e-05	1.57661e-05	1.32502e-05
1176	5.88058e-05	1.79521e-05	2.06367e-05	1.77179e-05
1177	0.000102513	3.37063e-05	3.76612e-05	3.30321e-05
1178	0.000100407	3.43797e-05	3.71986e-05	3.45434e-05
1179	0.000101778	3.39102e-05	3.71465e-05	3.49763e-05
1180	5.92808e-05	1.67753e-05	1.88551e-05	1.38083e-05
1181	9.44801e-05	3.0367e-05	3.36799e-05	2.60573e-05
1182	9.31474e-05	2.87669e-05	3.15233e-05	2.50747e-05
1183	9.84987e-05	2.81214e-05	3.27384e-05	2.6531e-05
1184	0.000162081	5.0475e-05	5.5828e-05	5.16829e-05
1185	0.000159381	5.0395e-05	5.60455e-05	5.04528e-05
1186	0.000159897	5.03317e-05	5.52833e-05	4.96564e-05
1187	2.83846e-05	8.81413e-06	9.8978e-06	8.90573e-06
1188	3.21479e-05	1.04555e-05	1.15547e-05	1.06822e-05
1189	2.64025e-05	7.79716e-06	8.80004e-06	8.03718e-06
1190	2.61982e-05	7.65651e-06	8.75387e-06	7.90218e-06
1191	2.80371e-05	8.05323e-06	9.05535e-06	8.41797e-06
1192	3.28677e-05	9.72738e-06	1.09178e-05	1.01188e-05
1193	3.01691e-05	8.22724e-06	9.43374e-06	8.82308e-06
1194	2.58165e-05	7.72146e-06	8.38562e-06	8.22148e-06
1195	2.9697e-05	9.14459e-06	9.70591e-06	9.79436e-06
1196	2.30759e-05	7.0215e-06	7.61408e-06	7.63739e-06
1197	2.31202e-05	6.99475e-06	7.74757e-06	7.57801e-06
1198	2.28646e-05	7.45511e-06	7.79724e-06	8.16028e-06
1199	2.47773e-05	7.71578e-06	8.18245e-06	8.64733e-06
1200	2.23095e-05	7.44391e-06	7.75767e-06	8.33186e-06
1201	2.59772e-05	8.89204e-06	8.79142e-06	9.74763e-06
1202	2.56359e-05	9.00496e-06	9.47729e-06	1.02596e-05
1203	2.33753e-05	7.12285e-06	7.60059e-06	8.67312e-06
1204	4.07937e-05	1.01091e-05	1.0949e-05	1.47134e-05
1205	3.55178e-05	9.43841e-06	1.02681e-05	1.32527e-05
1206	2.54578e-05	6.99111e-06	7.64527e-06	8.71946e-06
1207	4.76198e-05	9.94229e-06	1.1273e-05	1.38298e-05
1208	3.83861e-05	8.72809e-06	1.10693e-05	1.49963e-05
1209	5.29586e-05	1.07903e-05	1.597e-05	2.26132e-05
1210	5.83372e-05	1.15378e-05	1.49491e-05	2.21996e-05
1211	2.5654e-05	9.11552e-06	9.2202e-06	9.83367e-06
1212	2.97383e-05	1.0524e-05	1.05697e-05	1.16955e-05
1213	2.75037e-05	1.01755e-05	1.03171e-05	1.06941e-05
1214	2.74728e-05	9.92094e-06	1.0431e-05	1.0541e-05
1215	3.28544e-05	1.27502e-05	1.27538e-05	1.35386e-05
1216	3.66413e-05	1.39536e-05	1.39452e-05	1.52997e-05
1217	3.76447e-05	1.50038e-05	1.5267e-05	1.64465e-05
1218	5.16064e-05	2.04809e-05	2.17019e-05	2.51774e-05
1219	5.60398e-05	2.27314e-05	2.38342e-05	2.97077e-05
1220	9.50201e-05	3.90408e-05	4.07556e-05	5.14033e-05
1221	9.4464e-05	3.72423e-05	4.01963e-05	5.00468e-05
1222	9.39982e-05	3.85363e-05	4.05129e-05	5.2106e-05
1223	5.92173e-05	2.15763e-05	2.27823e-05	2.50549e-05
1224	9.86117e-05	3.6669e-05	3.83501e-05	4.55621e-05
1225	8.32854e-05	3.25887e-05	3.38088e-05	3.85713e-05
1226	8.65394e-05	3.4655e-05	3.45789e-05	4.18668e-05
1227	0.000137754	5.67836e-05	5.71819e-05	7.31954e-05
1228	0.000140437	5.69391e-05	5.64882e-05	7.1117e-05
1229	0.000140479	5.83745e-05	5.69504e-05	7.07628e-05
1230	3.53422e-05	1.38028e-05	1.36987e-05	1.45596e-05
1231	4.14285e-05	1.6307e-05	1.62607e-05	1.77663e-05
1232	3.43835e-05	1.31834e-05	1.32154e-05	1.35183e-05
1233	3.34213e-05	1.25443e-05	1.2721e-05	1.25003e-05
1234	3.98488e-05	1.49626e-05	1.52815e-05	1.54512e-05
1235	4.48188e-05	1.732e-05	1.75337e-05	1.81618e-05
1236	4.63978e-05	1.69732e-05	1.78021e-05	1.74962e-05
1237	6.90338e-05	2.72346e-05	2.89046e-05	2.96829e-05
1238	5.93565e-05	2.41528e-05	2.70342e-05	2.80855e-05
1239	6.64936e-05	2.42416e-05	2.61799e-05	2.81512e-05
1240	0.000102132	3.92359e-05	4.22332e-05	4.84497e-05
1241	0.000100123	3.9014e-05	4.32816e-05	4.78658e-05
1242	0.000124266	4.53085e-05	4.93729e-05	5.9917e-05
1243	0.000206716	7.45451e-05	8.10282e-05	9.97415e-05
1244	0.00029098	0.000110909	0.000119757	0.000149189
1245	0.000302069	0.000111939	0.000118761	0.000153503
1246	0.000298736	0.000113675	0.000120948	0.000152415
1247	4.17351e-05	1.50422e-05	1.55592e-05	1.61501e-05
1248	4.9791e-05	1.81273e-05	1.87652e-05	1.98317e-05
1249	3.89333e-05	1.32939e-05	1.39765e-05	1.4674e-05
1250	3.61e-05	1.2229e-05	1.28593e-05	1.33863e-05
1251	4.32893e-05	1.48704e-05	1.5309e-05	1.68079e-05
1252	5.14652e-05	1.81082e-05	1.86144e-05	2.01708e-05
1253	4.32035e-05	1.48067e-05	1.5129e-05	1.67583e-05
1254	6.95278e-05	2.51429e-05	2.46144e-05	2.7922e-05
1255	6.81141e-05	2.48292e-05	2.43672e-05	2.85646e-05
1256	6.70287e-05	2.38153e-05	2.56757e-05	2.86752e-05
1257	4.49062e-05	1.60058e-05	1.60727e-05	1.85881e-05
1258	5.47309e-05	2.08717e-05	2.04949e-05	2.35105e-05
1259	4.30389e-05	1.52071e-05	1.55037e-05	1.78898e-05
1260	4.18075e-05	1.46895e-05	1.54199e-05	1.74531e-05
1261	4.89339e-05	1.83775e-05	1.84746e-05	2.11444e-05
1262	5.42475e-05	2.04072e-05	2.07356e-05	2.42024e-05
1263	5.55912e-05	2.13899e-05	2.16563e-05	2.40792e-05
1264	8.61518e-05	3.59116e-05	3.49923e-05	4.25694e-05
1265	8.97246e-05	3.82259e-05	3.75577e-05	4.29561e-05
1266	0.000142447	6.16717e-05	5.97879e-05	7.18018e-05
1267	0.00014085	6.17856e-05	5.97867e-05	7.13886e-05
1268	0.000141918	6.06074e-05	5.98875e-05	6.8372e-05
1269	7.92022e-05	3.3873e-05	3.30438e-05	3.75415e-05
1270	0.000126057	5.65648e-05	5.29812e-05	6.35408e-05
1271	0.000123652	5.57487e-05	5.36285e-05	6.52001e-05
1272	0.000128139	5.64624e-05	5.38379e-05	6.41293e-05
1273	5.56791e-05	2.21607e-05	2.17853e-05	2.43732e-05
1274	6.78903e-05	2.70346e-05	2.68515e-05	2.93961e-05
1275	5.65304e-05	2.36543e-05	2.33204e-05	2.50886e-05
1276	5.45263e-05	2.27645e-05	2.26512e-05	2.37367e-05
1277	7.07263e-05	3.12648e-05	3.07062e-05	3.23751e-05
1278	8.09539e-05	3.52618e-05	3.47164e-05	3.7847e-05
1279	8.78138e-05	3.94193e-05	3.92768e-05	3.8697e-05
1280	0.000109852	5.44521e-05	5.52038e-05	5.16586e-05
1281	0.000136947	5.98776e-05	6.14539e-05	6.05732e-05
1282	0.0002	9.0337e-05	9.0391e-05	9.45111e-05
1283	0.000199994	8.90616e-05	9.10252e-05	9.50277e-05
1284	0.000198451	8.96113e-05	9.10293e-05	9.31521e-05
1285	0.00012944	5.49844e-05	5.75363e-05	5.5161e-05
1286	0.000187642	8.05197e-05	8.45974e-05	8.53249e-05
1287	0.000189991	8.34153e-05	8.36029e-05	8.62624e-05
1288	0.000184054	8.14281e-05	8.53521e-05	8.7986e-05
1289	7.38581e-05	3.40746e-05	3.31457e-05	3.48969e-05
1290	9.27364e-05	4.38768e-05	4.22794e-05	4.28141e-05
1291	7.13403e-05	3.15836e-05	3.13003e-05	3.41165e-05
1292	6.88197e-05	2.8905e-05	2.8756e-05	3.1741e-05
1293	8.94026e-05	3.92355e-05	3.95838e-05	4.23508e-05
1294	0.000102077	4.77478e-05	4.75346e-05	4.96912e-05
1295	0.00011685	4.68958e-05	4.8595e-05	5.28254e-05
1296	0.000141231	6.12058e-05	6.27329e-05	6.08531e-05
1297	0.000164132	6.2743e-05	6.58777e-05	8.1287e-05
1298	0.000230578	9.16509e-05	9.64382e-05	0.000119009
1299	0.000238188	9.25228e-05	9.7144e-05	0.000118124
1300	0.000232355	9.28395e-05	9.61562e-05	0.000119567
1301	0.00015467	6.65765e-05	6.86673e-05	7.72859e-05
1302	0.000219605	9.94723e-05	9.8336e-05	0.000111355
1303	0.000226099	9.85317e-05	0.000100471	0.000110839
1304	0.000219342	9.76678e-05	9.96877e-05	0.000112758
1305	9.07992e-05	3.86687e-05	3.92888e-05	4.24627e-05
1306	0.000115768	4.93491e-05	4.98462e-05	5.29557e-05
1307	8.55211e-05	3.27361e-05	3.45789e-05	3.88579e-05
1308	8.74013e-05	3.01747e-05	3.23427e-05	3.82243e-05
1309	9.86432e-05	3.6992e-05	4.03131e-05	4.31618e-05
1310	0.000114626	4.54475e-05	4.81885e-05	5.01137e-05
1311	0.000132109	4.64125e-05	5.07037e-05	6.36554e-05
1312	0.000166466	5.24974e-05	5.83668e-05	7.12314e-05
1313	0.000147003	5.55348e-05	6.03355e-05	8.61268e-05
1314	0.000179157	6.69461e-05	6.71493e-05	8.68912e-05
1315	0.000263688	0.000106855	0.000101547	0.000124633
1316	0.00031344	0.000127187	0.000121897	0.000148012
1317	0.000372984	0.0001557	0.000140999	0.000181722
1318	0.000516808	0.000224159	0.000199527	0.000255443
1319	0.000398659	0.000157431	0.000144922	0.000198739
1320	0.000587408	0.000235882	0.000214605	0.000296845
1321	0.00066755	0.000274249	0.000248334	0.000342758
1322	0.000268747	0.000105337	9.9192e-05	0.000132007
1323	0.000317198	0.000124704	0.000117918	0.000158373
1324	0.000381703	0.000152407	0.000142002	0.000188134
1325	0.000533292	0.000216184	0.000201413	0.000268121
1326	9.44309e-05	3.37553e-05	3.62469e-05	3.41562e-05
1327	0.000142579	5.37225e-05	5.58088e-05	4.99429e-05
1328	9.36186e-05	3.36987e-05	3.68446e-05	3.86372e-05
1329	0.000121162	4.87319e-05	5.02334e-05	5.36464e-05
1330	0.000105766	3.43942e-05	4.00048e-05	4.06838e-05
1331	0.000127972	3.95189e-05	4.76987e-05	4.62609e-05
1332	0.000145232	4.52057e-05	5.19683e-05	5.57138e-05
1333	0.000164016	5.44852e-05	5.94182e-05	6.52238e-05
1334	0.000176075	5.8698e-05	6.39642e-05	6.66907e-05
1335	0.000198475	5.82738e-05	6.94749e-05	7.90273e-05
1336	0.000276772	8.38893e-05	0.000101044	0.000124335
1337	0.000323756	0.000103626	0.00012429	0.000151757
1338	0.000383095	0.00011497	0.000138153	0.000171071
1339	0.000509924	0.000157924	0.000190362	0.000237826
1340	0.000383038	0.000111739	0.000136829	0.000157007
1341	0.000275374	8.18944e-05	9.88572e-05	0.000107133
1342	0.000346511	0.000108811	0.000129653	0.000135281
1343	0.000331424	0.000105839	0.000124486	0.000131966
1344	0.000526586	0.000173097	0.000204957	0.000213155
1345	0.000663129	0.000228126	0.000266204	0.000278571
1346	0.000561628	0.00016987	0.000206781	0.00023349
1347	0.000712514	0.000220056	0.00026689	0.000307969
1348	0.000636984	0.000203695	0.000244788	0.000261176
1349	0.000855778	0.00028656	0.000339656	0.000359764
1350	9.45342e-05	3.41778e-05	3.98034e-05	3.9999e-05
1351	0.000137874	5.49062e-05	6.31784e-05	6.32261e-05
1352	9.17063e-05	3.23435e-05	3.8492e-05	4.00835e-05
1353	0.000126037	4.21729e-05	4.97923e-05	5.14257e-05
1354	9.94786e-05	3.53333e-05	4.39052e-05	4.50684e-05
1355	0.000137536	4.65015e-05	5.87942e-05	6.23736e-05
1356	0.000125451	4.51775e-05	5.70803e-05	5.79367e-05
1357	7.26005e-05	2.57229e-05	3.2628e-05	3.10327e-05
1358	8.6457e-05	2.90092e-05	3.95024e-05	3.72037e-05
1359	6.06498e-05	2.36975e-05	2.63455e-05	2.58325e-05
1360	7.62535e-05	3.03514e-05	3.35648e-05	3.35645e-05
1361	5.09588e-05	2.03942e-05	2.18327e-05	2.15275e-05
1362	5.83958e-05	2.25694e-05	2.46759e-05	2.3761e-05
1363	6.57217e-05	2.56513e-05	2.85492e-05	2.86814e-05
1364	7.96752e-05	3.26204e-05	3.47469e-05	3.43594e-05
1365	9.62099e-05	3.72489e-05	3.94166e-05	3.87943e-05
1366	9.69491e-05	3.8917e-05	4.38009e-05	4.4841e-05
1367	0.000153624	6.35177e-05	6.82463e-05	7.12997e-05
1368	0.000157161	6.29772e-05	6.84675e-05	7.55799e-05
1369	4.01056e-05	1.55705e-05	1.64552e-05	1.66979e-05
1370	3.6229e-05	1.41577e-05	1.45025e-05	1.56337e-05
1371	4.10776e-05	1.50935e-05	1.62689e-05	1.61608e-05
1372	4.90565e-05	1.75192e-05	1.93172e-05	1.88218e-05
1373	3.79957e-05	1.30226e-05	1.4371e-05	1.45816e-05
1374	3.905e-05	1.29038e-05	1.4599e-05	1.57892e-05
1375	4.99267e-05	1.5648e-05	1.7898e-05	1.73979e-05
1376	5.8824e-05	1.93953e-05	2.14859e-05	2.01844e-05
1377	5.96277e-05	1.93569e-05	2.19927e-05	2.11869e-05
1378	9.70388e-05	3.41636e-05	3.62636e-05	3.70621e-05
1379	0.000100668	3.405e-05	3.70765e-05	3.8406e-05
1380	9.80123e-05	3.47134e-05	3.73188e-05	3.81717e-05
1381	7.5762e-05	2.28928e-05	2.68019e-05	2.47916e-05
1382	0.000116349	3.68351e-05	4.38648e-05	4.09724e-05
1383	0.000104126	3.35268e-05	3.84067e-05	3.62224e-05
1384	0.00011824	4.01607e-05	4.47172e-05	4.24637e-05
1385	0.000178871	6.47773e-05	6.9286e-05	6.7926e-05
1386	0.000176515	6.49252e-05	7.07298e-05	6.95527e-05
1387	0.000180683	6.29678e-05	6.91176e-05	7.13109e-05
1388	3.13306e-05	1.13631e-05	1.22567e-05	1.19022e-05
1389	2.87365e-05	1.03477e-05	1.10989e-05	1.1422e-05
1390	3.3137e-05	1.27351e-05	1.34623e-05	1.22732e-05
1391	4.10496e-05	1.64297e-05	1.7598e-05	1.50821e-05
1392	4.9582e-05	1.89547e-05	2.13589e-05	1.7892e-05
1393	4.68593e-05	1.97187e-05	2.03261e-05	1.83951e-05
1394	3.2353e-05	1.28517e-05	1.34684e-05	1.22802e-05
1395	3.3226e-05	1.32536e-05	1.36008e-05	1.24953e-05
1396	4.28407e-05	1.77244e-05	1.82455e-05	1.63408e-05
1397	5.2767e-05	2.26754e-05	2.23959e-05	2.07878e-05
1398	5.44008e-05	2.20243e-05	2.2623e-05	2.13424e-05
1399	4.9714e-05	2.06026e-05	2.17411e-05	1.85747e-05
1400	6.71967e-05	2.67421e-05	2.90599e-05	2.50726e-05
1401	7.09041e-05	3.0817e-05	3.09133e-05	2.73157e-05
1402	2.79143e-05	1.11438e-05	1.16526e-05	1.14324e-05
1403	2.89721e-05	1.17329e-05	1.20503e-05	1.22818e-05
1404	2.76885e-05	1.12781e-05	1.17619e-05	1.18424e-05
1405	3.11803e-05	1.29082e-05	1.3238e-05	1.33232e-05
1406	2.6601e-05	1.08953e-05	1.13226e-05	1.21238e-05
1407	2.9437e-05	1.1895e-05	1.24958e-05	1.33523e-05
1408	3.27638e-05	1.36378e-05	1.41589e-05	1.55885e-05
1409	4.46026e-05	1.99672e-05	2.05074e-05	2.06718e-05
1410	4.59697e-05	2.00369e-05	2.05275e-05	2.18887e-05
1411	5.77963e-05	2.41619e-05	2.48618e-05	2.72305e-05
1412	9.61082e-05	3.93942e-05	4.02877e-05	4.51154e-05
1413	0.000105426	4.33317e-05	4.4614e-05	5.11717e-05
1414	0.000163817	6.90723e-05	7.12064e-05	8.42518e-05
1415	0.00016637	6.84406e-05	7.05427e-05	8.34013e-05
1416	0.000169241	6.80599e-05	7.01124e-05	8.63755e-05
1417	0.000106083	4.34543e-05	4.11354e-05	5.0348e-05
1418	0.000168819	6.93933e-05	6.648e-05	8.07304e-05
1419	0.000168993	6.90948e-05	6.65204e-05	8.38602e-05
1420	0.00017518	7.0021e-05	6.69313e-05	8.10214e-05
1421	2.24296e-05	9.14382e-06	9.12918e-06	1.01669e-05
1422	2.31556e-05	9.54286e-06	9.22691e-06	1.10977e-05
1423	2.1745e-05	8.58348e-06	8.73116e-06	9.74951e-06
1424	2.42935e-05	9.49778e-06	9.86882e-06	1.0793e-05
1425	2.08947e-05	8.19355e-06	8.20356e-06	9.74578e-06
1426	2.24291e-05	9.17393e-06	8.85381e-06	1.07278e-05
1427	2.58864e-05	1.01602e-05	1.01805e-05	1.24531e-05
1428	3.47752e-05	1.24678e-05	1.37879e-05	1.72928e-05
1429	3.5562e-05	1.30281e-05	1.4417e-05	2.11577e-05
1430	6.83803e-05	2.4767e-05	2.77772e-05	4.10177e-05
1431	6.86744e-05	2.52798e-05	2.74314e-05	4.09739e-05
1432	6.79674e-05	2.56974e-05	2.73675e-05	4.02116e-05
1433	3.94974e-05	1.49348e-05	1.61365e-05	1.85819e-05
1434	7.04136e-05	2.66708e-05	2.93627e-05	3.52339e-05
1435	6.09409e-05	2.26314e-05	2.58629e-05	2.95636e-05
1436	7.15422e-05	2.48926e-05	2.80024e-05	3.68725e-05
1437	0.00012021	4.26232e-05	4.65232e-05	6.51178e-05
1438	0.000122395	4.34523e-05	4.69453e-05	6.54541e-05
1439	0.000119608	4.23421e-05	4.71415e-05	6.51738e-05
1440	1.86914e-05	7.03984e-06	7.08136e-06	8.3534e-06
1441	1.82461e-05	6.9282e-06	6.94518e-06	8.48296e-06
1442	1.91337e-05	7.23134e-06	7.17488e-06	8.27649e-06
1443	2.14291e-05	8.17958e-06	8.13096e-06	9.27215e-06
1444	1.8761e-05	7.08225e-06	7.03138e-06	7.91861e-06
1445	2.05351e-05	7.87047e-06	7.74684e-06	8.92504e-06
1446	2.27213e-05	8.68346e-06	8.76217e-06	9.43009e-06
1447	4.36968e-05	1.72145e-05	1.70979e-05	1.83904e-05
1448	4.31701e-05	1.69715e-05	1.70307e-05	1.82877e-05
1449	4.25768e-05	1.70151e-05	1.6931e-05	1.83741e-05
1450	1.59747e-05	6.19555e-06	6.17543e-06	6.85204e-06
1451	1.54838e-05	6.28702e-06	6.25405e-06	6.97302e-06
1452	1.57273e-05	6.16214e-06	6.10519e-06	6.77466e-06
1453	1.7608e-05	6.95982e-06	6.93968e-06	7.72869e-06
1454	1.47215e-05	5.8355e-06	5.73501e-06	6.44992e-06
1455	1.56575e-05	6.34092e-06	6.11833e-06	7.0967e-06
1456	1.77671e-05	7.06317e-06	6.9109e-06	7.91295e-06
1457	2.99527e-05	1.23236e-05	1.15786e-05	1.31511e-05
1458	3.12817e-05	1.28928e-05	1.26126e-05	1.49847e-05
1459	4.72098e-05	1.95882e-05	1.95453e-05	2.38283e-05
1460	2.96173e-05	1.34109e-05	1.22936e-05	1.39144e-05
1461	5.95596e-05	2.6602e-05	2.45077e-05	2.9645e-05
1462	6.05284e-05	2.67548e-05	2.41545e-05	2.81775e-05
1463	5.9152e-05	2.73389e-05	2.51832e-05	2.7518e-05
1464	1.2797e-05	5.11189e-06	5.0437e-06	5.70943e-06
1465	1.2744e-05	5.15843e-06	5.09326e-06	5.76034e-06
1466	1.3133e-05	5.21846e-06	5.21144e-06	5.95531e-06
1467	1.48064e-05	5.95391e-06	6.01613e-06	6.81791e-06
1468	1.30535e-05	5.20289e-06	5.30208e-06	5.95061e-06
1469	1.35457e-05	5.46355e-06	5.49058e-06	6.17253e-06
1470	1.56523e-05	6.3935e-06	6.54685e-06	7.2914e-06
1471	2.19945e-05	8.97476e-06	9.85787e-06	1.12227e-05
1472	2.49291e-05	9.51375e-06	9.77456e-06	1.05899e-05
1473	3.73963e-05	1.47685e-05	1.48397e-05	1.87042e-05
1474	2.37248e-05	9.01659e-06	9.02678e-06	9.78027e-06
1475	5.06698e-05	1.8599e-05	1.8848e-05	2.11728e-05
1476	4.98828e-05	1.89368e-05	1.87487e-05	2.06279e-05
1477	4.8027e-05	1.88605e-05	1.86564e-05	2.12762e-05
1478	1.2438e-05	5.01465e-06	5.14235e-06	5.84311e-06
1479	1.2343e-05	5.13359e-06	5.34602e-06	5.99821e-06
1480	1.32744e-05	5.30944e-06	5.37483e-06	6.40678e-06
1481	1.45652e-05	5.80015e-06	5.89578e-06	7.01457e-06
1482	1.36192e-05	5.61821e-06	5.53232e-06	7.05603e-06
1483	1.47441e-05	6.2824e-06	6.16758e-06	8.0149e-06
1484	1.64695e-05	6.97065e-06	6.64431e-06	8.98406e-06
1485	2.13552e-05	1.07592e-05	9.78429e-06	1.30504e-05
1486	2.24981e-05	1.15099e-05	1.15789e-05	1.66855e-05
1487	4.778e-05	2.46122e-05	2.44628e-05	3.66808e-05
1488	4.63316e-05	2.44235e-05	2.42255e-05	3.54542e-05
1489	4.66903e-05	2.44686e-05	2.43443e-05	3.49283e-05
1490	2.63336e-05	1.35211e-05	1.23204e-05	1.47309e-05
1491	5.29794e-05	2.67971e-05	2.48055e-05	2.9973e-05
1492	4.41877e-05	2.38031e-05	2.2177e-05	2.74928e-05
1493	5.04772e-05	2.69292e-05	2.2839e-05	3.11182e-05
1494	9.0868e-05	4.84314e-05	4.15192e-05	5.5891e-05
1495	9.14671e-05	4.85305e-05	4.11617e-05	5.72198e-05
1496	9.15572e-05	4.76768e-05	4.13136e-05	5.56854e-05
1497	1.22582e-05	5.11632e-06	4.96434e-06	6.37819e-06
1498	1.24655e-05	5.53913e-06	5.32971e-06	7.28279e-06
1499	1.21317e-05	4.88904e-06	4.70245e-06	5.8546e-06
1500	1.33348e-05	5.33727e-06	5.18405e-06	6.28379e-06
1501	1.17976e-05	4.7246e-06	4.51822e-06	5.65408e-06
1502	1.33071e-05	5.2927e-06	5.0446e-06	6.55501e-06
1503	1.40153e-05	5.47673e-06	5.30115e-06	6.61763e-06
1504	2.15267e-05	8.15835e-06	8.48682e-06	1.24108e-05
1505	2.30546e-05	8.62705e-06	8.20976e-06	1.20302e-05
1506	2.35776e-05	8.76761e-06	8.33439e-06	1.19032e-05
1507	3.69799e-05	1.29602e-05	1.24322e-05	2.02015e-05
1508	1.01752e-05	4.07473e-06	4.02332e-06	5.01347e-06
1509	1.0458e-05	4.29144e-06	4.17978e-06	5.59535e-06
1510	9.78365e-06	3.82259e-06	3.8499e-06	4.61371e-06
1511	1.08537e-05	4.27093e-06	4.31853e-06	4.97267e-06
1512	9.07715e-06	3.53808e-06	3.66217e-06	4.38447e-06
1513	9.60956e-06	3.77515e-06	3.85764e-06	4.9777e-06
1514	1.04141e-05	3.95686e-06	4.23632e-06	4.7299e-06
1515	1.73155e-05	5.85548e-06	6.28438e-06	7.26976e-06
1516	1.63973e-05	5.98648e-06	7.01189e-06	6.97059e-06
1517	1.41984e-05	4.70026e-06	4.99846e-06	6.36603e-06
1518	2.82859e-05	9.52501e-06	1.05612e-05	1.36059e-05
1519	2.83498e-05	8.90766e-06	1.00861e-05	1.24136e-05
1520	5.86128e-05	2.06337e-05	2.22924e-05	2.74109e-05
1521	6.05133e-05	2.06346e-05	2.21478e-05	2.77543e-05
1522	5.94303e-05	2.03481e-05	2.18745e-05	2.77408e-05
1523	2.6186e-05	7.96194e-06	8.94516e-06	1.10182e-05
1524	5.49549e-05	1.81188e-05	1.92848e-05	2.55864e-05
1525	5.30963e-05	1.80703e-05	1.97177e-05	2.5631e-05
1526	5.51126e-05	1.75763e-05	1.94954e-05	2.57861e-05
1527	8.86803e-06	3.50199e-06	3.67256e-06	4.35319e-06
1528	9.48303e-06	3.62085e-06	3.90018e-06	4.75427e-06
1529	9.54003e-06	3.98923e-06	4.11362e-06	4.88134e-06
1530	1.05681e-05	4.45113e-06	4.55066e-06	5.40464e-06
1531	1.05931e-05	4.58243e-06	4.80394e-06	5.63625e-06
1532	1.16568e-05	4.96864e-06	5.4234e-06	6.14576e-06
1533	1.3715e-05	6.29187e-06	6.35634e-06	7.73945e-06
1534	2.61481e-05	1.29917e-05	1.23639e-05	1.60062e-05
1535	2.32621e-05	1.19194e-05	1.19101e-05	1.56513e-05
1536	2.11773e-05	1.04796e-05	1.06089e-05	1.3189e-05
1537	4.08978e-05	2.04236e-05	2.03018e-05	2.53569e-05
1538	4.1259e-05	2.02514e-05	1.98012e-05	2.53927e-05
1539	3.86798e-05	2.05015e-05	1.93521e-05	2.48892e-05
1540	5.41201e-05	2.9365e-05	2.68001e-05	3.57615e-05
1541	0.000101128	5.20486e-05	4.72122e-05	6.51034e-05
1542	9.80148e-05	5.21997e-05	4.78162e-05	6.47564e-05
1543	9.40238e-05	5.20383e-05	4.76506e-05	6.48737e-05
1544	1.0252e-05	4.56565e-06	4.79001e-06	5.80881e-06
1545	1.11025e-05	4.92653e-06	5.38796e-06	6.30594e-06
1546	1.07066e-05	4.81528e-06	4.81341e-06	6.10915e-06
1547	1.13589e-05	5.28493e-06	5.16786e-06	6.60225e-06
1548	1.16423e-05	5.18469e-06	5.07895e-06	6.65181e-06
1549	1.31218e-05	6.05944e-06	5.94051e-06	7.85665e-06
1550	1.42937e-05	6.55648e-06	6.16367e-06	8.60063e-06
1551	2.50125e-05	1.16818e-05	1.07012e-05	1.48591e-05
1552	2.50344e-05	1.06132e-05	1.05853e-05	1.30884e-05
1553	3.73234e-05	1.68267e-05	1.65689e-05	2.23589e-05
1554	2.69642e-05	1.19984e-05	1.18137e-05	1.573e-05
1555	5.40274e-05	2.50817e-05	2.46457e-05	3.35418e-05
1556	5.61013e-05	2.48071e-05	2.46273e-05	3.35352e-05
1557	5.72022e-05	2.53028e-05	2.39615e-05	3.30298e-05
1558	1.05221e-05	4.57265e-06	4.52895e-06	5.91162e-06
1559	1.16672e-05	5.20232e-06	4.97421e-06	6.47105e-06
1560	9.78306e-06	4.14015e-06	4.21576e-06	5.508e-06
1561	1.02992e-05	4.54826e-06	4.58662e-06	6.01112e-06
1562	9.55598e-06	3.96928e-06	4.10999e-06	5.45916e-06
1563	1.12585e-05	4.70999e-06	4.82066e-06	6.47055e-06
1564	1.08094e-05	4.45588e-06	4.56929e-06	6.61528e-06
1565	1.79866e-05	7.24861e-06	7.00571e-06	1.20378e-05
1566	1.75255e-05	7.47665e-06	7.71651e-06	1.16368e-05
1567	2.15303e-05	9.73058e-06	9.52808e-06	1.32123e-05
1568	3.88779e-05	1.7268e-05	1.6802e-05	2.16111e-05
1569	8.69635e-06	3.61488e-06	3.78648e-06	4.54668e-06
1570	9.63107e-06	4.08677e-06	4.18868e-06	5.06185e-06
1571	8.56568e-06	3.45587e-06	3.76145e-06	4.10802e-06
1572	9.03748e-06	3.76271e-06	4.11238e-06	4.56265e-06
1573	9.17053e-06	3.57489e-06	3.98718e-06	4.06728e-06
1574	1.00493e-05	3.89369e-06	4.29603e-06	4.35202e-06
1575	1.08818e-05	3.97975e-06	4.53508e-06	4.53526e-06
1576	1.75403e-05	6.10604e-06	6.95959e-06	6.39643e-06
1577	1.72458e-05	5.81588e-06	6.47755e-06	6.03481e-06
1578	1.44863e-05	4.61212e-06	5.14421e-06	4.74415e-06
1579	2.85508e-05	9.08505e-06	9.61842e-06	9.13703e-06
1580	3.06091e-05	9.80441e-06	1.04438e-05	8.62478e-06
1581	6.13361e-05	2.1656e-05	2.2578e-05	2.14314e-05
1582	6.20575e-05	2.20576e-05	2.22453e-05	2.02981e-05
1583	6.15788e-05	2.14246e-05	2.2524e-05	1.96591e-05
1584	2.68957e-05	7.76047e-06	9.08222e-06	8.05134e-06
1585	5.59814e-05	1.76116e-05	1.9224e-05	1.92167e-05
1586	5.44728e-05	1.85648e-05	2.02606e-05	1.9226e-05
1587	5.59753e-05	1.7503e-05	1.94051e-05	1.9514e-05
1588	9.35235e-06	3.89865e-06	4.22086e-06	4.42884e-06
1589	1.02399e-05	4.40197e-06	4.7019e-06	4.9742e-06
1590	9.84611e-06	4.27055e-06	4.46234e-06	4.97395e-06
1591	1.03049e-05	4.52865e-06	4.67432e-06	5.42e-06
1592	1.10725e-05	5.05138e-06	5.13251e-06	5.81833e-06
1593	1.26469e-05	5.73152e-06	5.88354e-06	6.58975e-06
1594	1.35817e-05	6.63389e-06	6.50717e-06	7.62896e-06
1595	2.36661e-05	1.24582e-05	1.2085e-05	1.33279e-05
1596	2.48796e-05	1.32415e-05	1.24416e-05	1.39714e-05
1597	5.12734e-05	2.63659e-05	2.55601e-05	2.90972e-05
1598	5.1801e-05	2.60966e-05	2.48856e-05	2.94101e-05
1599	5.23416e-05	2.63023e-05	2.50216e-05	2.92504e-05
1600	2.74677e-05	1.28727e-05	1.23303e-05	1.39572e-05
1601	5.50131e-05	2.47771e-05	2.39779e-05	2.85264e-05
1602	4.49223e-05	2.09969e-05	2.05076e-05	2.41145e-05
1603	4.94743e-05	2.42611e-05	2.35065e-05	2.81174e-05
1604	9.43869e-05	4.48401e-05	4.25876e-05	5.18046e-05
1605	9.25706e-05	4.45074e-05	4.33733e-05	5.17594e-05
1606	9.49605e-05	4.4623e-05	4.15662e-05	5.2346e-05
1607	1.08981e-05	4.91508e-06	4.946e-06	5.58475e-06
1608	1.22506e-05	5.59008e-06	5.56857e-06	6.3809e-06
1609	1.06447e-05	4.69393e-06	4.70214e-06	5.53695e-06
1610	1.10503e-05	4.92388e-06	4.89198e-06	5.93229e-06
1611	1.15252e-05	4.9745e-06	4.9461e-06	5.93948e-06
1612	1.39006e-05	5.91204e-06	5.8154e-06	6.96049e-06
1613	1.32899e-05	5.77657e-06	5.62355e-06	7.17506e-06
1614	1.02599e-05	4.45674e-06	4.5205e-06	5.32961e-06
1615	1.15643e-05	4.98387e-06	5.04062e-06	5.94065e-06
1616	9.4555e-06	4.12735e-06	4.23263e-06	4.84699e-06
1617	9.99519e-06	4.30975e-06	4.46443e-06	5.06133e-06
1618	9.51951e-06	4.31499e-06	4.30577e-06	4.7413e-06
1619	1.05155e-05	4.93664e-06	4.8168e-06	5.538e-06
1620	1.0625e-05	4.9244e-06	4.80305e-06	5.17171e-06
1621	1.8425e-05	9.67152e-06	9.13154e-06	8.26158e-06
1622	1.97598e-05	9.81142e-06	9.73079e-06	9.23234e-06
1623	1.97117e-05	9.18327e-06	8.04823e-06	8.21796e-06
1624	3.39487e-05	1.5522e-05	1.37163e-05	1.53544e-05
1625	9.59149e-06	4.45838e-06	4.42586e-06	4.65612e-06
1626	1.07124e-05	5.22676e-06	5.04764e-06	5.12851e-06
1627	9.74514e-06	4.51643e-06	4.6099e-06	4.73253e-06
1628	1.02281e-05	4.739e-06	4.8322e-06	5.05377e-06
1629	1.09579e-05	5.36026e-06	5.31505e-06	5.33954e-06
1630	1.28847e-05	6.10128e-06	6.00279e-06	5.82315e-06
1631	1.3537e-05	6.6709e-06	6.48148e-06	6.59976e-06
1632	2.77809e-05	1.30854e-05	1.25643e-05	1.33773e-05
1633	2.37628e-05	1.19394e-05	1.13457e-05	1.18672e-05
1634	2.35404e-05	1.05041e-05	1.04808e-05	1.09774e-05
1635	4.61111e-05	2.11797e-05	2.05764e-05	2.19805e-05
1636	4.64307e-05	2.10052e-05	2.00242e-05	2.22702e-05
1637	5.07786e-05	2.17695e-05	2.1371e-05	2.31513e-05
1638	8.85338e-05	3.61436e-05	3.5156e-05	3.7286e-05
1639	0.00014736	5.93194e-05	5.88488e-05	6.73752e-05
1640	0.000149032	6.07244e-05	5.84295e-05	6.64876e-05
1641	0.000150521	6.01125e-05	5.79639e-05	6.69528e-05
1642	1.10494e-05	5.71515e-06	5.46981e-06	5.65772e-06
1643	1.26901e-05	6.79041e-06	6.38801e-06	6.70063e-06
1644	1.13432e-05	5.67984e-06	5.39244e-06	5.95014e-06
1645	1.15851e-05	5.71186e-06	5.50184e-06	6.25421e-06
1646	1.31903e-05	6.52687e-06	6.08139e-06	6.84604e-06
1647	1.4811e-05	7.67352e-06	6.97006e-06	7.87176e-06
1648	1.65801e-05	7.872e-06	7.31448e-06	8.15238e-06
1649	3.16636e-05	1.54434e-05	1.42736e-05	1.4011e-05
1650	3.11823e-05	1.44106e-05	1.3197e-05	1.42942e-05
1651	3.38546e-05	1.65976e-05	1.49731e-05	1.66756e-05
1652	5.30168e-05	2.71995e-05	2.42675e-05	2.86858e-05
1653	1.28302e-05	6.2421e-06	5.88188e-06	6.42833e-06
1654	1.44191e-05	7.32103e-06	6.77652e-06	7.44392e-06
1655	1.20031e-05	5.63389e-06	5.47639e-06	5.89266e-06
1656	1.21407e-05	5.58967e-06	5.54288e-06	6.0891e-06
1657	1.26417e-05	5.90637e-06	5.74919e-06	5.98069e-06
1658	1.50028e-05	6.93898e-06	6.84861e-06	7.11544e-06
1659	1.3973e-05	6.74264e-06	6.78895e-06	7.02904e-06
1660	2.48582e-05	1.22148e-05	1.19468e-05	1.22353e-05
1661	2.53444e-05	1.25888e-05	1.17705e-05	1.24093e-05
1662	2.33402e-05	1.18253e-05	1.06235e-05	1.18308e-05
1663	3.78208e-05	1.83636e-05	1.645e-05	1.87266e-05
1664	1.18399e-05	5.95551e-06	5.49965e-06	5.54054e-06
1665	1.31995e-05	6.72646e-06	6.18216e-06	6.30917e-06
1666	1.15471e-05	5.99192e-06	5.51933e-06	5.17052e-06
1667	1.19068e-05	6.00961e-06	5.61968e-06	5.35534e-06
1668	1.27183e-05	6.93553e-06	6.31935e-06	5.47704e-06
1669	1.45411e-05	8.05851e-06	7.17652e-06	6.40013e-06
1670	1.52044e-05	8.11677e-06	7.61018e-06	6.30995e-06
1671	2.77782e-05	1.28057e-05	1.2917e-05	9.29505e-06
1672	2.59244e-05	1.22873e-05	1.2241e-05	9.74539e-06
1673	2.64215e-05	1.20008e-05	1.09015e-05	7.48452e-06
1674	4.13981e-05	1.7815e-05	1.70585e-05	1.24914e-05
1675	1.23338e-05	7.12789e-06	6.45731e-06	5.61234e-06
1676	1.42541e-05	8.48696e-06	7.47893e-06	6.71595e-06
1677	1.19908e-05	6.9068e-06	6.37115e-06	5.85419e-06
1678	1.23807e-05	6.93947e-06	6.50738e-06	6.21483e-06
1679	1.30927e-05	7.84665e-06	7.21688e-06	6.93139e-06
1680	1.48725e-05	9.02369e-06	8.19913e-06	7.96477e-06
1681	1.64495e-05	9.72003e-06	8.89374e-06	8.64175e-06
1682	2.57707e-05	1.55717e-05	1.43169e-05	1.64951e-05
1683	3.09429e-05	1.75165e-05	1.51351e-05	1.93939e-05
1684	6.18892e-05	3.2295e-05	2.81691e-05	3.9548e-05
1685	6.0229e-05	3.32668e-05	2.86234e-05	3.91575e-05
1686	6.02552e-05	3.34892e-05	2.86925e-05	3.85439e-05
1687	3.04369e-05	1.72544e-05	1.63029e-05	1.62808e-05
1688	5.61236e-05	3.11833e-05	2.94801e-05	3.3534e-05
1689	5.19036e-05	2.79169e-05	2.67038e-05	2.83986e-05
1690	5.60444e-05	3.03304e-05	2.87052e-05	3.36394e-05
1691	0.000105827	5.37445e-05	5.03485e-05	6.2884e-05
1692	0.000102797	5.19162e-05	5.02058e-05	6.12069e-05
1693	0.000101131	5.3446e-05	5.00772e-05	5.97741e-05
1694	1.32296e-05	7.75483e-06	7.07445e-06	7.09932e-06
1695	1.46715e-05	8.72712e-06	7.91401e-06	8.2506e-06
1696	1.329e-05	7.41287e-06	6.81888e-06	7.06637e-06
1697	1.35049e-05	7.3352e-06	6.85584e-06	7.30514e-06
1698	1.49018e-05	8.04213e-06	7.29416e-06	7.90895e-06
1699	1.75471e-05	9.606e-06	8.44562e-06	9.14626e-06
1700	1.81346e-05	9.23022e-06	8.52073e-06	9.60207e-06
1701	2.87063e-05	1.42785e-05	1.31173e-05	1.61853e-05
1702	2.19408e-05	1.16617e-05	1.0906e-05	1.26508e-05
1703	3.28421e-05	1.73727e-05	1.60335e-05	1.89183e-05
1704	6.30036e-05	3.06296e-05	2.87811e-05	3.34059e-05
1705	5.80465e-05	3.07063e-05	2.77316e-05	3.27869e-05
1706	7.54169e-05	4.0438e-05	3.90683e-05	4.21701e-05
1707	9.14552e-05	4.43431e-05	3.88351e-05	4.84782e-05
1708	1.40557e-05	7.33697e-06	6.69873e-06	7.24194e-06
1709	1.66569e-05	8.47686e-06	7.76398e-06	8.68387e-06
1710	1.31396e-05	6.8355e-06	6.21375e-06	6.45053e-06
1711	1.34696e-05	7.1481e-06	6.34157e-06	6.62158e-06
1712	1.35572e-05	7.27722e-06	6.47568e-06	6.52154e-06
1713	1.50706e-05	7.75943e-06	6.91368e-06	7.24762e-06
1714	1.54977e-05	8.65068e-06	7.02869e-06	7.06991e-06
1715	1.91902e-05	1.03504e-05	8.783e-06	7.78213e-06
1716	1.92038e-05	1.02059e-05	8.27664e-06	8.58617e-06
1717	1.96606e-05	1.03819e-05	7.81229e-06	7.95352e-06
1718	3.10909e-05	1.56697e-05	1.12383e-05	9.5619e-06
1719	4.44499e-05	2.04834e-05	1.46238e-05	1.15501e-05
1720	4.5137e-05	2.16577e-05	1.51419e-05	1.25924e-05
1721	7.1862e-05	3.20966e-05	2.21011e-05	1.63738e-05
1722	4.6907e-05	2.19861e-05	1.51438e-05	1.52938e-05
1723	6.70222e-05	3.03919e-05	2.07727e-05	2.09011e-05
1724	3.15781e-05	1.46307e-05	1.02225e-05	1.17075e-05
1725	4.43638e-05	1.85163e-05	1.28756e-05	1.45519e-05
1726	4.6179e-05	2.04234e-05	1.34618e-05	1.59831e-05
1727	7.27654e-05	2.92235e-05	1.84867e-05	2.32037e-05
1728	1.41878e-05	8.09716e-06	7.26266e-06	7.02478e-06
1729	1.66271e-05	9.43676e-06	8.40235e-06	8.40314e-06
1730	1.45529e-05	8.60445e-06	7.77846e-06	7.22131e-06
1731	1.48878e-05	8.63166e-06	7.85885e-06	7.14966e-06
1732	1.7056e-05	1.05925e-05	9.33386e-06	8.74953e-06
1733	2.07353e-05	1.28862e-05	1.11441e-05	1.04386e-05
1734	2.00083e-05	1.27553e-05	1.09722e-05	1.05029e-05
1735	3.19978e-05	2.00783e-05	1.70909e-05	1.62403e-05
1736	2.695e-05	1.59054e-05	1.46603e-05	1.23809e-05
1737	3.65766e-05	2.30078e-05	1.95074e-05	1.73422e-05
1738	6.09866e-05	3.65114e-05	3.10164e-05	2.91103e-05
1739	6.13864e-05	3.67077e-05	3.21493e-05	2.93257e-05
1740	0.000106175	6.05706e-05	5.39794e-05	5.24928e-05
1741	0.000107444	6.13731e-05	5.36314e-05	5.16852e-05
1742	0.000105642	6.13142e-05	5.37172e-05	5.41277e-05
1743	5.99705e-05	3.77319e-05	3.05989e-05	3.08559e-05
1744	0.000107367	6.3313e-05	5.26815e-05	5.71356e-05
1745	0.000105131	6.40281e-05	5.25268e-05	5.70105e-05
1746	0.000102869	6.37229e-05	5.29623e-05	5.72395e-05
1747	1.64775e-05	1.02259e-05	9.10592e-06	8.80742e-06
1748	1.97316e-05	1.24396e-05	1.093e-05	1.11e-05
1749	1.5404e-05	9.38882e-06	8.53649e-06	8.18407e-06
1750	1.54562e-05	9.44761e-06	8.6333e-06	8.18517e-06
1751	1.83664e-05	1.10458e-05	9.68762e-06	9.43349e-06
1752	2.10965e-05	1.31893e-05	1.13177e-05	1.11826e-05
1753	2.3902e-05	1.48095e-05	1.26595e-05	1.20032e-05
1754	4.43984e-05	2.66029e-05	2.23499e-05	2.29298e-05
1755	3.41543e-05	2.12366e-05	1.78893e-05	1.78456e-05
1756	4.21725e-05	2.62439e-05	2.22981e-05	2.38363e-05
1757	6.86764e-05	4.06399e-05	3.52313e-05	4.07351e-05
1758	6.53655e-05	4.21635e-05	3.50081e-05	4.10948e-05
1759	0.000110058	6.83756e-05	5.6994e-05	7.11065e-05
1760	0.000113539	6.74735e-05	5.74648e-05	7.06226e-05
1761	0.000113517	6.75097e-05	5.76516e-05	7.02677e-05
1762	6.85862e-05	4.07898e-05	3.56036e-05	4.02235e-05
1763	0.000119271	6.75236e-05	5.91093e-05	7.20138e-05
1764	0.000117636	6.79041e-05	5.93336e-05	7.01358e-05
1765	0.000122065	6.82727e-05	5.93664e-05	7.00726e-05
1766	1.84339e-05	1.07213e-05	9.41103e-06	9.11343e-06
1767	2.32316e-05	1.3385e-05	1.16274e-05	1.13925e-05
1768	1.63692e-05	9.21309e-06	8.2869e-06	7.97133e-06
1769	1.55088e-05	8.84868e-06	8.00103e-06	7.89301e-06
1770	1.71246e-05	9.71736e-06	8.66995e-06	8.43366e-06
1771	2.01515e-05	1.18022e-05	1.02409e-05	1.00136e-05
1772	1.99852e-05	1.09346e-05	9.48495e-06	9.71654e-06
1773	2.35531e-05	1.34784e-05	1.16304e-05	1.15411e-05
1774	2.07444e-05	1.12037e-05	9.26951e-06	9.72214e-06
1775	2.79256e-05	1.47968e-05	1.20675e-05	1.31385e-05
1776	4.87748e-05	2.67406e-05	2.2075e-05	2.50697e-05
1777	4.67832e-05	2.62048e-05	2.10279e-05	2.33264e-05
1778	6.37007e-05	3.67265e-05	3.01167e-05	3.38683e-05
1779	6.67032e-05	3.47222e-05	2.69162e-05	2.88861e-05
1780	1.50544e-05	8.76441e-06	8.05529e-06	7.69009e-06
1781	1.54986e-05	8.96195e-06	8.13469e-06	8.05924e-06
1782	1.55234e-05	9.63239e-06	8.95413e-06	8.19193e-06
1783	1.82662e-05	1.14675e-05	1.03919e-05	9.59128e-06
1784	1.62412e-05	1.04462e-05	9.70647e-06	8.70613e-06
1785	1.72174e-05	1.08279e-05	9.89795e-06	9.05455e-06
1786	2.12572e-05	1.41674e-05	1.28377e-05	1.17012e-05
1787	3.46386e-05	2.40651e-05	2.0803e-05	1.86642e-05
1788	3.58587e-05	2.31797e-05	2.05397e-05	1.79075e-05
1789	3.55363e-05	2.25503e-05	2.06798e-05	2.14192e-05
1790	6.26601e-05	3.80664e-05	3.41201e-05	3.67906e-05
1791	6.10259e-05	3.80752e-05	3.40633e-05	3.60015e-05
1792	5.60793e-05	3.46915e-05	3.2127e-05	3.46082e-05
1793	8.75376e-05	5.33927e-05	4.88842e-05	4.76453e-05
1794	8.69825e-05	5.37741e-05	4.93897e-05	5.24729e-05
1795	7.79157e-05	5.09221e-05	4.52151e-05	5.0205e-05
1796	0.000105014	7.04196e-05	6.27653e-05	6.42967e-05
1797	0.000126389	8.17927e-05	7.12787e-05	8.2441e-05
1798	0.000195489	0.00011624	0.000102367	0.000120537
1799	0.000191024	0.000113227	0.000105138	0.000124315
1800	0.000292373	0.000170544	0.000148523	0.000176712
1801	0.000190313	0.000121196	0.000105525	0.000122945
1802	0.000208507	0.000133598	0.000116419	0.000119358
1803	0.00028321	0.000172597	0.000151048	0.000184444
1804	1.6103e-05	1.03539e-05	9.72027e-06	8.81764e-06
1805	1.74452e-05	1.13762e-05	1.07255e-05	9.43758e-06
1806	1.6789e-05	1.08339e-05	1.00504e-05	9.42066e-06
1807	1.87036e-05	1.18955e-05	1.08386e-05	1.04852e-05
1808	1.79047e-05	1.14206e-05	1.06893e-05	1.00525e-05
1809	2.03426e-05	1.3289e-05	1.24092e-05	1.17884e-05
1810	2.22001e-05	1.38017e-05	1.30381e-05	1.26904e-05
1811	3.76941e-05	2.27012e-05	2.09104e-05	2.08267e-05
1812	3.66956e-05	2.14471e-05	1.93182e-05	1.94613e-05
1813	4.46477e-05	2.79699e-05	2.55642e-05	2.78093e-05
1814	8.11578e-05	5.00334e-05	4.40959e-05	4.95692e-05
1815	8.05505e-05	4.75768e-05	4.3606e-05	4.75535e-05
1816	7.71639e-05	4.6558e-05	4.34636e-05	4.80931e-05
1817	0.000127375	7.37959e-05	6.93473e-05	7.87535e-05
1818	0.000130306	7.61386e-05	6.82903e-05	8.11806e-05
1819	0.000143474	7.97184e-05	7.3152e-05	8.48941e-05
1820	0.000212619	0.000118046	0.000107466	0.000128097
1821	0.000206822	0.000115829	0.000106288	0.000127505
1822	0.000225186	0.000119507	0.0001134	0.00013515
1823	0.00031323	0.0001699	0.000154648	0.000192555
1824	0.000311629	0.000166407	0.000157751	0.000190642
1825	0.000313632	0.000166439	0.000156963	0.000192521
1826	1.61445e-05	1.01011e-05	9.68144e-06	8.85201e-06
1827	1.74606e-05	1.10896e-05	1.06358e-05	9.80855e-06
1828	1.56485e-05	9.50189e-06	8.84606e-06	8.17559e-06
1829	1.73625e-05	1.05438e-05	9.71629e-06	9.35557e-06
1830	1.49996e-05	9.06653e-06	8.29563e-06	7.58206e-06
1831	1.67739e-05	1.01646e-05	9.39474e-06	8.58223e-06
1832	1.82708e-05	1.08455e-05	9.43704e-06	8.9969e-06
1833	2.7968e-05	1.76608e-05	1.52723e-05	1.27812e-05
1834	2.9328e-05	1.81367e-05	1.64394e-05	1.32972e-05
1835	3.29431e-05	1.96263e-05	1.67801e-05	1.53253e-05
1836	6.38622e-05	3.5707e-05	3.11264e-05	2.86498e-05
1837	5.97026e-05	3.55176e-05	3.00843e-05	2.7955e-05
1838	5.14883e-05	3.03218e-05	2.57937e-05	2.3246e-05
1839	8.59672e-05	4.70247e-05	4.12527e-05	4.05044e-05
1840	8.47954e-05	4.83372e-05	4.1741e-05	3.9626e-05
1841	7.34884e-05	4.23303e-05	3.50079e-05	3.32654e-05
1842	0.000117939	6.67444e-05	5.62055e-05	5.78372e-05
1843	0.000121037	6.5262e-05	5.59455e-05	5.52377e-05
1844	8.92563e-05	5.24176e-05	4.47193e-05	4.53372e-05
1845	0.000134351	7.60331e-05	6.71482e-05	7.54809e-05
1846	0.000136979	7.71648e-05	6.76305e-05	7.1891e-05
1847	0.000134492	7.79054e-05	6.71893e-05	7.34956e-05
1848	1.26419e-05	7.70642e-06	7.14243e-06	6.61737e-06
1849	1.32162e-05	8.18339e-06	7.62711e-06	7.04043e-06
1850	1.18298e-05	7.2094e-06	6.69492e-06	6.19313e-06
1851	1.27143e-05	7.71842e-06	7.18129e-06	6.66626e-06
1852	1.1662e-05	7.08357e-06	6.64735e-06	6.26114e-06
1853	1.2018e-05	7.05643e-06	6.48012e-06	6.34859e-06
1854	1.24069e-05	7.53228e-06	7.10315e-06	6.69908e-06
1855	1.54832e-05	9.52092e-06	8.9502e-06	8.5826e-06
1856	1.43622e-05	8.52341e-06	8.28487e-06	7.55065e-06
1857	1.17458e-05	6.61628e-06	6.22762e-06	5.96689e-06
1858	2.04319e-05	1.1414e-05	1.06133e-05	7.94373e-06
1859	3.44639e-05	1.96191e-05	1.82596e-05	1.22221e-05
1860	2.43498e-05	1.21522e-05	1.17849e-05	9.00979e-06
1861	4.24297e-05	2.09021e-05	2.0436e-05	1.39569e-05
1862	1.96381e-05	8.29838e-06	8.02859e-06	8.27682e-06
1863	2.82423e-05	1.13549e-05	1.12161e-05	1.15931e-05
1864	3.20607e-05	1.39907e-05	1.40543e-05	1.48045e-05
1865	2.25581e-05	1.13384e-05	1.03741e-05	8.43664e-06
1866	3.80009e-05	1.9762e-05	1.80635e-05	1.23993e-05
1867	2.73903e-05	1.24499e-05	1.13296e-05	9.83869e-06
1868	4.7743e-05	2.18491e-05	2.00446e-05	1.52371e-05
1869	1.30054e-05	8.02149e-06	7.53808e-06	7.04054e-06
1870	1.37647e-05	8.57652e-06	7.90744e-06	7.74e-06
1871	1.45835e-05	9.1339e-06	8.6774e-06	8.07687e-06
1872	1.55191e-05	9.59277e-06	9.1994e-06	8.49506e-06
1873	1.68262e-05	1.07276e-05	1.01897e-05	9.59877e-06
1874	1.91289e-05	1.23446e-05	1.15154e-05	1.09338e-05
1875	2.14427e-05	1.36507e-05	1.30831e-05	1.2777e-05
1876	2.87407e-05	1.7468e-05	1.71031e-05	1.7736e-05
1877	2.35689e-05	1.47562e-05	1.38335e-05	1.50014e-05
1878	3.32477e-05	2.12885e-05	2.06315e-05	2.0154e-05
1879	5.77352e-05	3.61213e-05	3.48716e-05	3.58692e-05
1880	5.2741e-05	3.34225e-05	3.31819e-05	3.32097e-05
1881	7.48278e-05	4.78768e-05	4.65132e-05	4.98373e-05
1882	0.000125533	7.59326e-05	7.16658e-05	8.59086e-05
1883	0.00019326	0.000112875	0.000106186	0.00013202
1884	0.000194818	0.000113916	0.000107337	0.000137437
1885	0.00019784	0.00011482	0.00010793	0.000133625
1886	1.57311e-05	9.94446e-06	9.3021e-06	8.85058e-06
1887	1.72974e-05	1.10127e-05	1.02076e-05	9.7744e-06
1888	1.51161e-05	9.41966e-06	8.79176e-06	8.42811e-06
1889	1.56884e-05	1.00807e-05	9.31675e-06	8.92695e-06
1890	1.54013e-05	9.38406e-06	8.753e-06	8.31091e-06
1891	1.79613e-05	1.07719e-05	9.97163e-06	9.53385e-06
1892	1.78607e-05	1.08634e-05	1.03501e-05	9.63105e-06
1893	3.06998e-05	1.86681e-05	1.72816e-05	1.56239e-05
1894	2.99955e-05	1.78055e-05	1.81294e-05	1.66706e-05
1895	3.25799e-05	2.02087e-05	1.81856e-05	1.71744e-05
1896	6.19979e-05	3.46133e-05	3.08428e-05	3.13372e-05
1897	6.26897e-05	3.55565e-05	3.24868e-05	3.04463e-05
1898	6.01615e-05	3.44418e-05	2.98526e-05	2.97497e-05
1899	0.000104259	5.56178e-05	4.96761e-05	5.12795e-05
1900	0.000103564	5.64963e-05	4.94708e-05	4.99993e-05
1901	0.000101745	5.50649e-05	4.76954e-05	4.68278e-05
1902	0.000132086	7.10431e-05	6.27037e-05	6.17216e-05
1903	0.000182605	9.28687e-05	8.12359e-05	8.59989e-05
1904	0.000243329	0.000121126	0.000110686	0.000139267
1905	0.000218101	0.000108904	0.000121227	0.000148354
1906	0.000372468	0.00017917	0.000149492	0.000204823
1907	0.000296046	0.000149021	0.000128668	0.000118669
1908	0.000311277	0.000159014	0.000137678	0.000107609
1909	0.00041774	0.000207922	0.000181311	0.000181328
1910	1.3834e-05	8.34215e-06	7.76494e-06	7.3618e-06
1911	1.5181e-05	8.96122e-06	8.45766e-06	7.95867e-06
1912	1.23524e-05	7.55713e-06	6.90532e-06	6.47321e-06
1913	1.27032e-05	7.69992e-06	7.01974e-06	6.53895e-06
1914	1.21971e-05	7.09015e-06	6.55938e-06	6.07054e-06
1915	1.38163e-05	7.87038e-06	7.3926e-06	6.66398e-06
1916	1.23929e-05	7.02401e-06	6.40453e-06	6.07141e-06
1917	1.5493e-05	8.70235e-06	7.77513e-06	7.21963e-06
1918	1.38407e-05	8.10031e-06	7.25739e-06	6.78466e-06
1919	1.398e-05	7.69065e-06	7.16143e-06	6.34374e-06
1920	1.95462e-05	1.0863e-05	1.01994e-05	8.12982e-06
1921	2.04041e-05	1.1884e-05	1.03497e-05	8.96219e-06
1922	4.14581e-05	2.31737e-05	2.06607e-05	1.89615e-05
1923	4.22429e-05	2.33003e-05	2.02756e-05	1.92986e-05
1924	4.01303e-05	2.33933e-05	2.09206e-05	1.92605e-05
1925	2.0854e-05	1.16288e-05	1.03289e-05	8.93132e-06
1926	3.96023e-05	2.19413e-05	1.93036e-05	1.89894e-05
1927	4.16344e-05	2.14655e-05	1.999e-05	1.89239e-05
1928	4.00022e-05	2.20576e-05	1.99863e-05	1.86745e-05
1929	1.2e-05	7.11576e-06	6.5409e-06	6.26656e-06
1930	1.31763e-05	7.64292e-06	7.14489e-06	6.71869e-06
1931	1.22688e-05	7.59301e-06	6.96918e-06	6.82331e-06
1932	1.30679e-05	8.00873e-06	7.42912e-06	7.30136e-06
1933	1.37473e-05	8.74492e-06	8.0491e-06	7.79873e-06
1934	1.47888e-05	9.17898e-06	8.50013e-06	8.33927e-06
1935	1.67467e-05	1.07851e-05	9.96684e-06	9.6312e-06
1936	3.23188e-05	1.85562e-05	1.81665e-05	1.81359e-05
1937	3.16447e-05	1.86273e-05	1.78176e-05	1.88526e-05
1938	3.24845e-05	1.86543e-05	1.83216e-05	1.89011e-05
1939	1.45404e-05	9.13748e-06	8.45101e-06	8.1066e-06
1940	1.66157e-05	1.01815e-05	9.51474e-06	9.25077e-06
1941	1.52613e-05	9.43999e-06	8.66296e-06	8.21309e-06
1942	1.62475e-05	9.74387e-06	9.0629e-06	8.58839e-06
1943	1.72067e-05	1.05577e-05	9.56449e-06	9.25972e-06
1944	1.99254e-05	1.20604e-05	1.09313e-05	1.07306e-05
1945	2.08705e-05	1.25329e-05	1.13287e-05	1.12422e-05
1946	3.36191e-05	1.84504e-05	1.6944e-05	1.7192e-05
1947	2.59939e-05	1.60707e-05	1.4294e-05	1.49127e-05
1948	3.06018e-05	1.85273e-05	1.65383e-05	1.77021e-05
1949	5.5354e-05	3.1955e-05	2.88041e-05	3.13899e-05
1950	5.5311e-05	3.28341e-05	2.92302e-05	3.06008e-05
1951	1.65199e-05	9.98393e-06	9.05074e-06	8.5355e-06
1952	1.86758e-05	1.11144e-05	9.97068e-06	9.43974e-06
1953	1.57304e-05	9.47802e-06	8.63026e-06	7.83189e-06
1954	1.61632e-05	9.83257e-06	9.03234e-06	8.23713e-06
1955	1.70318e-05	9.67667e-06	9.02706e-06	7.84674e-06
1956	1.95866e-05	1.10387e-05	1.03328e-05	9.00727e-06
1957	1.971e-05	1.10686e-05	1.02853e-05	8.74448e-06
1958	3.3807e-05	1.80726e-05	1.62471e-05	1.44597e-05
1959	3.37457e-05	1.80926e-05	1.62539e-05	1.37829e-05
1960	5.10974e-05	2.79184e-05	2.43906e-05	2.25505e-05
1961	3.09422e-05	1.66763e-05	1.57523e-05	1.4925e-05
1962	5.91679e-05	3.05543e-05	2.90264e-05	3.00341e-05
1963	6.11223e-05	3.1479e-05	2.89798e-05	2.80839e-05
1964	5.74532e-05	3.10618e-05	2.93582e-05	3.11914e-05
1965	1.57345e-05	8.86808e-06	8.41218e-06	7.07671e-06
1966	1.76181e-05	9.7721e-06	9.38464e-06	7.78556e-06
1967	1.42684e-05	8.22401e-06	7.84886e-06	6.78928e-06
1968	1.40361e-05	8.30907e-06	7.86319e-06	7.28324e-06
1969	1.51068e-05	8.63891e-06	8.36175e-06	7.41654e-06
1970	1.66084e-05	9.22924e-06	8.97071e-06	7.84487e-06
1971	1.63618e-05	9.76703e-06	9.39502e-06	8.86093e-06
1972	2.63176e-05	1.51851e-05	1.46497e-05	1.4782e-05
1973	2.75236e-05	1.59744e-05	1.57833e-05	1.6147e-05
1974	2.04009e-05	1.17103e-05	1.06491e-05	1.0422e-05
1975	3.9414e-05	2.11779e-05	1.92301e-05	1.96127e-05
1976	3.75825e-05	2.20329e-05	1.82663e-05	1.84307e-05
1977	7.2219e-05	4.04458e-05	3.4427e-05	3.60163e-05
1978	7.13973e-05	4.08853e-05	3.45552e-05	3.7762e-05
1979	7.16956e-05	4.04237e-05	3.44855e-05	3.74617e-05
1980	3.6504e-05	2.0832e-05	1.89845e-05	1.98544e-05
1981	6.97304e-05	3.90729e-05	3.51211e-05	4.00532e-05
1982	7.01961e-05	3.87479e-05	3.48533e-05	3.92402e-05
1983	7.24386e-05	3.80275e-05	3.49466e-05	4.0705e-05
1984	1.72634e-05	1.00237e-05	9.49481e-06	8.70621e-06
1985	2.10508e-05	1.20525e-05	1.13351e-05	1.04966e-05
1986	1.77345e-05	1.07053e-05	1.00877e-05	9.20388e-06
1987	1.73503e-05	1.07148e-05	1.01522e-05	9.37035e-06
1988	2.2295e-05	1.36974e-05	1.23229e-05	1.13755e-05
1989	2.66808e-05	1.6438e-05	1.43686e-05	1.38905e-05
1990	2.69556e-05	1.64847e-05	1.46585e-05	1.36456e-05
1991	4.65667e-05	2.58931e-05	2.3077e-05	2.07183e-05
1992	4.39724e-05	2.58132e-05	2.30577e-05	2.2284e-05
1993	4.53559e-05	2.45723e-05	2.12525e-05	1.96395e-05
1994	7.28402e-05	3.92603e-05	3.43539e-05	3.45367e-05
1995	7.66387e-05	4.18728e-05	3.46951e-05	3.4005e-05
1996	7.86498e-05	3.85485e-05	3.33332e-05	3.24231e-05
1997	0.000125733	6.1205e-05	5.31593e-05	5.63577e-05
[truncated: 5,529 more rows]
