# Supplementary material for: Identification of the trail-following pheromone receptor in termites
Source: eLife. 2025 Aug 19;13:RP101814. doi: 10.7554/eLife.101814 (PMC12364489; doi:10.7554/eLife.101814)
Supplement: Figure 7—source data 1. [file elife-101814-fig7-data1.xlsx]

## Sheet: Sheet1
	DESeq2			edgeR
OR	log2 fold change (worker vs soldier)	lfcSE	p-value	log2 fold change (worker vs soldier)	p-value
PsimOR1	-0.5905	0.3426	0.0848	-0.6679	0.0186
PsimOR10	-0.4006	0.9211	0.6636	-0.4375	0.5905
PsimOR11	0.3565	0.5005	0.4763	0.262	0.5589
PsimOR12	-0.2703	1.2658	0.8309	-0.4127	0.8431
PsimOR13	0.1677	0.6478	0.7957	0.0539	1
PsimOR14	-1.8565	0.8841	0.0357	-1.8989	0.0036
PsimOR15	-0.578	0.8735	0.5082	-0.6829	0.4084
PsimOR16	-0.4973	1.1753	0.6722	-0.5878	0.613
PsimOR17	-0.7328	3.7695	0.8459	-0.5892	1
PsimOR18	1.2163	1.6983	0.4739	1.0486	0.5486
PsimOR19	0.6517	1.0553	0.5369	0.5408	0.5589
PsimOR2	1.2943	0.7769	0.0957	1.1238	0.1342
PsimOR20	-2.9803	0.7045	0	-3.0603	0
PsimOR22	0.5913	1.1359	0.6027	0.5019	0.7071
PsimOR23	-0.0816	1.3315	0.9511	-0.1249	1
PsimOR24	-1.3934	0.8105	0.0856	-1.4649	0.025
PsimOR25	0.9132	1.4392	0.5257	0.6897	0.6457
PsimOR26	-0.879	0.1926	0	-0.9787	0
PsimOR27	0.2988	1.1656	0.7977	0.2	1
PsimOR28	0.3981	1.1226	0.7229	0.3443	0.722
PsimOR29	-0.4531	1.3799	0.7426	-0.45	0.6812
PsimOR3	-0.037	1.156	0.9744	-0.1663	0.8475
PsimOR30	0.7053	1.184	0.5514	0.5977	0.6758
PsimOR31	0.1924	0.5699	0.7357	0.0691	0.9348
PsimOR32	-0.2186	1.4043	0.8763	-0.288	1
PsimOR34	-0.4167	0.4244	0.3261	-0.5383	0.1738
PsimOR35	-1.0587	2.6395	0.6883	-0.8036	0.5553
PsimOR36	-0.3664	0.9102	0.6873	-0.5093	0.5249
PsimOR37	0.3495	1.2265	0.7756	0.2614	0.8477
PsimOR39	-0.0669	0.6154	0.9135	-0.1886	0.7502
PsimOR4	0.0586	0.7043	0.9336	-0.0669	1
PsimOR40	-0.5383	0.34	0.1134	-0.6076	0.0395
PsimOR41	-0.3886	0.2793	0.164	-0.5129	0.0916
PsimOR42	NA	NA	NA	0	1
PsimOR43	-0.5866	1.4600	0.6878	-0.5596	0.7796
PsimOR44	0.1981	1.6775	0.906	0.128	1
PsimOR45	-1.5455	1.331	0.2456	-1.4406	0.1817
PsimOR46	-3.0579	1.863	0.1007	-2.9	0.0445
PsimOR47	2.375	1.7303	0.1699	2.2464	0.1134
PsimOR48	0.0016	1.2033	0.9989	-0.0757	1
PsimOR49	-1.0692	1.6425	0.5151	-0.9962	0.3814
PsimOR5	0.4942	0.6163	0.4227	0.4152	0.4609
PsimOR50	0.229	4.0805	0.9553	1.6045	1
PsimOR6	-0.0086	0.5823	0.9882	-0.0515	1
PsimOR7	0.161	0.4781	0.7363	0.1071	0.8517
PsimOR8	0.4963	0.6856	0.4692	0.3467	0.6466
PsimOR9	2.0761	0.9969	0.0373	1.8932	0.0303
