# Supplementary material for: Identification of the trail-following pheromone receptor in termites
Source: eLife. 2025 Aug 19;13:RP101814. doi: 10.7554/eLife.101814 (PMC12364489; doi:10.7554/eLife.101814)
Supplement: Figure 7—source data 2. [file elife-101814-fig7-data2.xlsx]

## Sheet: Sheet1
EAG response normalized to air stimulation (%)		log2 value
worker	soldier	worker	soldier
199.52	92.67	7.64	6.53
322.81	116.73	8.33	6.87
132.44	136.93	7.05	7.10
142.77	78.81	7.16	6.30
124.07	120.01	6.96	6.91
135.73	120.49	7.08	6.91
192.41	136.59	7.59	7.09
146.41	116.43	7.19	6.86
122.17	176.51	6.93	7.46
201.83	122.48	7.66	6.94
123.71	110.96	6.95	6.79
142.15	139.64	7.15	7.13
115.99	138.32	6.86	7.11
164.7	132.45	7.36	7.05
167.08	152.31	7.38	7.25
